# Supplementary material for: Morbidity and mortality outcomes of patients requiring isolated tricuspid valve surgery: a retrospective cohort study of 537 patients in New South Wales between 2002 and 2018
Source: PubMed Central journal article supplement — BMJ Open. 2024 May 7;14(5):e080804. doi: 10.1136/bmjopen-2023-080804 (PMC11086187; doi:10.1136/bmjopen-2023-080804), 2024-05-07
Supplement: bmjopen-2023-080804.draft_revisions.pdf [file bmjopen-2023-080804.draft_revisions.pdf]

# BMJ Open

BMJ Open is committed to open peer review. As part of this commitment we make the peer review history of every article we publish publicly available.

When an article is published we post the peer reviewers' comments and the authors' responses online. We also post the versions of the paper that were used during peer review. These are the versions that the peer review comments apply to.

The versions of the paper that follow are the versions that were submitted during the peer review process. They are not the versions of record or the final published versions. They should not be cited or distributed as the published version of this manuscript.

BMJ Open is an open access journal and the full, final, typeset and author-corrected version of record of the manuscript is available on our site with no access controls, subscription charges or pay-per-view fees (<http://bmjopen.bmj.com>).

If you have any questions on BMJ Open's open peer review process please email [info.bmjopen@bmj.com](mailto:info.bmjopen@bmj.com)

# BMJ Open

## Morbidity and Mortality Outcomes of Patients requiring Isolated Tricuspid Valve Surgery

|                               |                                                                                                                                                                                                                                                                                                                      |
|-------------------------------|----------------------------------------------------------------------------------------------------------------------------------------------------------------------------------------------------------------------------------------------------------------------------------------------------------------------|
| Journal:                      | <i>BMJ Open</i>                                                                                                                                                                                                                                                                                                      |
| Manuscript ID                 | bmjopen-2023-080804                                                                                                                                                                                                                                                                                                  |
| Article Type:                 | Original research                                                                                                                                                                                                                                                                                                    |
| Date Submitted by the Author: | 11-Oct-2023                                                                                                                                                                                                                                                                                                          |
| Complete List of Authors:     | Harvey, Gregory; Concord Hospital, Cardiology<br>Chow, Vincent; Concord Hospital, Cardiology<br>Rubenis, Imants; Concord Hospital, Cardiology<br>Brieger, David; Concord Hospital, Cardiology<br>Kritharides, Leonard; Concord Hospital, Cardiology<br>Ng, Austin; Concord Repatriation General Hospital, Cardiology |
| Keywords:                     | Cardiothoracic surgery < SURGERY, CARDIOLOGY, Valvular heart disease < CARDIOLOGY                                                                                                                                                                                                                                    |
|                               |                                                                                                                                                                                                                                                                                                                      |

SCHOLARONE™  
Manuscripts

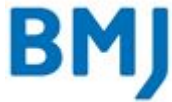

I, the Submitting Author has the right to grant and does grant on behalf of all authors of the Work (as defined in the below author licence), an exclusive licence and/or a non-exclusive licence for contributions from authors who are: i) UK Crown employees; ii) where BMJ has agreed a CC-BY licence shall apply, and/or iii) in accordance with the terms applicable for US Federal Government officers or employees acting as part of their official duties; on a worldwide, perpetual, irrevocable, royalty-free basis to BMJ Publishing Group Ltd ("BMJ") its licensees and where the relevant Journal is co-owned by BMJ to the co-owners of the Journal, to publish the Work in this journal and any other BMJ products and to exploit all rights, as set out in our [licence](#).

The Submitting Author accepts and understands that any supply made under these terms is made by BMJ to the Submitting Author unless you are acting as an employee on behalf of your employer or a postgraduate student of an affiliated institution which is paying any applicable article publishing charge ("APC") for Open Access articles. Where the Submitting Author wishes to make the Work available on an Open Access basis (and intends to pay the relevant APC), the terms of reuse of such Open Access shall be governed by a Creative Commons licence – details of these licences and which [Creative Commons](#) licence will apply to this Work are set out in our licence referred to above.

Other than as permitted in any relevant BMJ Author's Self Archiving Policies, I confirm this Work has not been accepted for publication elsewhere, is not being considered for publication elsewhere and does not duplicate material already published. I confirm all authors consent to publication of this Work and authorise the granting of this licence.

1  
2  
3 **Morbidity and Mortality Outcomes of Patients requiring Isolated Tricuspid Valve**  
4  
5 **Surgery**  
6

7 Harvey; Outcomes following Isolated Tricuspid Valve Surgery  
8  
9

10  
11  
12 Gregory Harvey (MD)<sup>a\*</sup>, Vincent Chow (MBBS, PhD)<sup>a</sup>, Imants Rubenis (MD)<sup>a</sup>, David  
13  
14 Brieger (MBBS, PhD)<sup>a</sup>, Leonard Kritharides (MBBS, PhD)<sup>a</sup>, Austin Chin Chwan Ng  
15  
16 (MBBS, BSc, MMed)<sup>a</sup>.  
17  
18

19 <sup>a</sup> Department of Cardiology, Concord Hospital, The University of Sydney, 1 Hospital  
20  
21 Road, Concord 2139, NSW, Australia  
22  
23

24  
25  
26 \* Contact information for corresponding author  
27

28 Dr Gregory Harvey  
29

30 Cardiology Department, Concord Hospital, The University of Sydney  
31

32 1 Hospital Road, Concord NSW 2139 Australia  
33  
34

35 Fax: (612) 9767 6994 Phone: (612) 9767 5000  
36  
37

38 Email: gmharvy@gmail.com  
39  
40  
41

42 **Funding:** This research received no specific grant from any funding agency in the public,  
43  
44 commercial or not-for-profit sectors.  
45  
46  
47  
48

49 **Competing interests:** All authors declare: no support from any organization for the  
50  
51 submitted work; no financial relationships with any organizations that might have an interest  
52  
53  
54  
55  
56  
57  
58  
59  
60

1  
2  
3 in the submitted work in the previous three years; no other relationships or activities that  
4  
5 could appear to have influenced the submitted work.  
6  
7  
8  
9

10 **Patient and Public involvement:** Patients and/or the public were involved in the design, or  
11  
12 conduct, or reporting or dissemination plans of this research. Refer to the Methods section for  
13  
14 further details.  
15  
16  
17  
18

19 **Ethical approval:** The study protocol was approved by the New South Wales Population  
20  
21 and Health Services Research Ethics Committee, reference number: 2013/09/479. The Ethics  
22  
23 Committees granted a waiver of the usual requirement for the consent of the individual to the  
24  
25 use of their health information. All patient data were de-identified and analysed  
26  
27 anonymously.  
28  
29  
30  
31  
32

33 **Data sharing:** No additional data available.  
34  
35  
36  
37

38 **Transparency:** The senior author affirms that the manuscript is an honest, accurate and  
39  
40 transparent account of the study being reported; that no important aspects of the study have  
41  
42 been omitted; and that any discrepancies from the study as planned (and, if relevant,  
43  
44 registered) have been explained.  
45  
46  
47  
48

49 **Word Count:** 3405 words  
50  
51  
52  
53  
54  
55  
56  
57  
58  
59  
60

## ABSTRACT

**Objectives:** The aim of the study was to evaluate mortality and morbidity outcomes following open-heart isolated tricuspid valve surgery (TVSx) with medium-long term follow up.

**Design:** Retrospective cohort study.

**Setting:** New South Wales (NSW) public and private hospital admissions between 1-Jan-2002 and 30-Jun-2018

**Participants:** A total of 537 patients underwent open isolated-TVX during the study period.

**Primary and Secondary outcome measures:** Primary outcome was all-cause mortality tracked from the death registry to 31-Dec-2018. Secondary morbidity outcomes including admission for congestive cardiac failure (CCF), new atrial fibrillation (AF), infective endocarditis (IE), pulmonary embolism (PE), and insertion of a permanent pacemaker (PPM) or implantable-cardioverter-defibrillator (ICD), were tracked from the Admitted Patient Data Collection (APDC) data base. Independent mortality associations were determined using the Cox regression method.

**Results:** A total of 537 patients underwent open isolated-TVX (46% male): median age (interquartile-range) was 63.5yo (43.9-73.8yo) with median length-of-stay 16days (10-31days). Main cardiovascular comorbidities were AF (54%) and CCF (42%); 67% had rheumatic TV. In-hospital and total mortality were 7.4% and 39.3% respectively (mean follow-up: 4.8yrs). Cause-specific deaths were evenly split between cardiovascular and noncardiovascular causes. Predictors of mortality included a history of congestive cardiac failure (hazard ratio [HR]=1.78, 95% confidence interval [CI]=1.33-2.38, p<0.001) and chronic pulmonary disease (HR=2.66, 95%CI=1.63-4.33, p<0.001). In-hospital PPM rate

1  
2  
3 was 10.0%. At 180days, 53 (9.9%) patients were admitted for CCF, 25 (10.1%) had new AF,  
4  
5 7 (1.5%) had new IE, and <1% had PE, post-discharge PPM or ICD insertion.  
6  
7

8 **Conclusion:** Open isolated-TVSx carries significant mortality risk, with decompensated CCF  
9  
10 and new AF the most common morbidities encountered post-surgery. This report forms a  
11  
12 benchmark to compare outcomes with newer percutaneous tricuspid interventions.  
13  
14

15  
16  
17 **Key Words:** Outcomes, tricuspid valve surgery, isolated cardiac valve surgery  
18  
19  
20  
21  
22  
23  
24  
25  
26  
27  
28  
29  
30  
31  
32  
33  
34  
35  
36  
37  
38  
39  
40  
41  
42  
43  
44  
45  
46  
47  
48  
49  
50  
51  
52  
53  
54  
55  
56  
57  
58  
59  
60

## STRENGTHS AND LIMITATIONS OF THIS STUDY

- A relatively large cohort of patients for an infrequently performed set of procedures.
- Study cohort was derived from a statewide unselected population from all public and private healthcare facilities that performed cardiothoracic surgery
- The use of a death registry with cause-specific data analysis adds detail to all-cause mortality figures.
- Comprises a heterogeneous group of procedures: TVSx annuloplasty, repair, replacement.
- Dataset lacks granular details such as echocardiographic data (e.g., RV size and function) or aetiology of TV dysfunction



## INTRODUCTION

The burden of tricuspid valve (TV) disease is expected to increase with the increasing age of the Australian population. The prevalence of moderate or severe TV regurgitation of any cause in developed countries is 4.0% in those over the age of 75, and 1.1% in those 65-74 (1). The prevalence of tricuspid valve stenosis, rare in developed countries, is not known.

The presence of tricuspid regurgitation (TR) is an independent predictor of increased mortality, both by itself (isolated functional TR) and for secondary aetiologies including left-sided valvular disease, heart failure, arrhythmogenic right ventricular cardiomyopathy, and pulmonary arterial hypertension (2-10).

TV surgery (TVSx) is largely performed in combination with other cardiac procedures, most frequently left-sided valve surgery (11). Society guidelines have consistently recommended isolated TVSx for patients with severe primary TR as their sole valvular lesion (12, 13). More recently the 2020 American Heart Association (AHA) and 2021 European Society of Cardiology (ESC) Valvular Heart Disease guidelines have recommended TVSx for select patients with severe secondary TR regardless of the presence of an indication for concurrent left-sided valve surgery or a history of prior left-sided valve surgery (14, 15).

Isolated open-heart TVSx (open-TVX) has traditionally been associated with high mortality rates. Reported in-hospital mortality rates have varied over time from 8.8-19.0% in small (n<500) older studies (16, 17), to 8.8-9.7% in larger studies (n=1364 in Alqahtani et al, and n=5005 in Zack et al) over the last twenty years (11, 18), to as low as 3.2% in a recent single-

1  
2  
3 centre study (n=95) involving carefully selected patients (19). However longer-term  
4 morbidity outcomes, including re-admission for heart failure, permanent pacemaker (PPM)  
5 requirement, pulmonary embolism (PE) or new-onset atrial fibrillation (AF), are not well-  
6 described. Moreover, while an association between TVSx and PE has not been described,  
7 worsening TR has been numerically (although not statistically) associated with pulmonary  
8 embolism, TR may result from chronic thromboembolic disease, and PE is a plausible  
9 complication of TVSx given the association between left-sided valvular intervention and  
10 stroke (20-22).  
11  
12  
13  
14  
15  
16  
17  
18  
19  
20  
21  
22  
23

24 The primary aim of this study was to determine the incidence and temporal trends of open-  
25 heart isolated-TVSx in an Australian statewide cohort and examine their mortality outcomes.  
26  
27

28 The secondary aim was to characterize morbidity events after isolated-TVSx.  
29  
30  
31  
32  
33  
34  
35  
36  
37  
38  
39  
40  
41  
42  
43  
44  
45  
46  
47  
48  
49  
50  
51  
52  
53  
54  
55  
56  
57  
58  
59  
60

## METHODS

### Study population

The Centre for Health Record Linkage (CHeReL), established in 2006, holds one of the largest data linkage systems in Australia containing high-quality linked health data of residents in the state of New South Wales (NSW) (23). From its Admission-Patient-Data-Collection (APDC) database, which includes  $\geq 97\%$  of all healthcare facilities in the state, we identified consecutive admissions that involved open-heart surgery (excluding percutaneous approach) for tricuspid valve pathology (see Supplementary Table 1 for relevant ACHI procedure codes) either as primary or secondary procedures coded under the Australian Classification of Health Interventions (ACHI) coding system between 1-July-2001 and 31-December-2018. Our research group has published detailed outcomes studies using data obtained from the APDC database (24-29).

### Data sources

Variables obtained from the APDC database for each hospital admission that involved TV5x include admission date, age, gender, country of birth, admission referral source, length of admission, and in-hospital mortality.

The primary and all secondary diagnoses (potentially up to 50 secondary diagnoses) associated with each admission were retrieved from the APDC database. Each diagnosis was

1  
2  
3 coded in the APDC database according to the International Classification of Diseases, Tenth  
4  
5 Revision Australian Modification (ICD-10AM). For this study, we pre-specified the  
6  
7 indication for cardiac valve surgery during admission as either for endocarditis (as primary or  
8  
9 secondary diagnosis) or as non-endocarditis valve surgery, and if concomitant coronary  
10  
11 secondary diagnosis) or as non-endocarditis valve surgery, and if concomitant coronary  
12  
13 artery bypass graft (CABG) surgery was performed in the same admission (see  
14  
15 Supplementary Table 1 for relevant ICD-10AM and ACHI codes). In addition, whether  
16  
17 rheumatic tricuspid valve was documented during admission was recorded. Additional  
18  
19 comorbidities extracted for this study include ischemic heart disease, prior percutaneous  
20  
21 coronary interventions [PCI] and/or CABG surgery, CCF, stroke, peripheral vascular disease,  
22  
23 prosthetic heart valve, and AF), primary or secondary pulmonary hypertension, cardiac risk  
24  
25 factors (including hypertension, hyperlipidaemia, diabetes and current/ex-smoker),  
26  
27 malignancy, chronic pulmonary disease, neurodegenerative disease, chronic kidney disease  
28  
29 and history of intravenous drug use (IVDU). In addition, the overall comorbid status of each  
30  
31 patient was quantified using the Charlson comorbidity index (CCI) (30). A value of 0  
32  
33 indicates no comorbidity, while higher values represent an increasing burden of comorbid  
34  
35 illnesses, while higher values represent an increasing burden of comorbid  
36  
37 illnesses.

## 42 **Study outcomes**

43  
44  
45  
46  
47 The primary outcome of the study was all-cause and cause-specific death rates, tracked from  
48  
49 the statewide death registry also held by CHeReL. For mortality analysis, cases were limited  
50  
51 to only NSW state residents to minimize incomplete tracking. The end-of-study date was set  
52  
53 at 31-December-2018. All death certificates were reviewed to ascertain cause-specific death  
54  
55  
56  
57

1  
2  
3 rates. Each death was coded independently by two reviewers (AN and VC) according to  
4  
5 general principles set by the World Health Organization (31). Reviewers were blinded to  
6  
7 patient's background comorbid illnesses during coding. Disparities were resolved by  
8  
9 consensus. Cause-specific mortality were based on prior published classifications (26). In  
10  
11 brief, cardiovascular cause was defined as death due to acute myocardial infarction, CCF,  
12  
13 stroke, cardiac-related causes (when more than one cardiac cause of death was recorded), or  
14  
15 PE. Noncardiovascular causes included death due to sepsis, malignancy, other  
16  
17 noncardiovascular causes, or undefined. Patients with multiple potential causes of death on  
18  
19 their death certificates were classified as "undefined" and labelled as noncardiovascular  
20  
21 death for the purposes of the present study.  
22  
23  
24  
25  
26  
27

28 Secondary outcomes of the study were tracked from the APDC database using linkage  
29  
30 method to determine morbidity events during follow-up post-surgery. These include first re-  
31  
32 admission for CCF, development of new AF or infective endocarditis, PE, and the need for a  
33  
34 PPM or implantable-cardioverter-defibrillator (ICD) implantation.  
35  
36  
37  
38  
39

40 The study protocol conforms to the ethical guidelines of the 1975 Declaration of Helsinki.  
41  
42 Approval was granted by the NSW Population and Health Services Research Ethics  
43  
44 Committee, reference number: 2013/09/479. The Ethics Committees granted a waiver of the  
45  
46 usual requirement for the consent of the individual to the use of their health information. All  
47  
48 patient data were de-identified and analysed anonymously.  
49  
50  
51  
52  
53  
54  
55  
56  
57  
58  
59  
60

## Statistical analysis

To determine the incidence and temporal trend on case-volumes of isolated open-TVSx statewide during the study period, all admissions between 1-January-2002 and 31-December-2018 were included. For the rest of the analyses, the study cohort was limited to NSW state residents and confined to the index admission between 1-January-2002 and 30-June-2018, enabling a minimum of six months follow-up. Thus, for those who had repeat TVSx during the study period (recurring patients), only their initial admission was included. End-of-study follow-up was prespecified at 31-December-2018.

All continuous variables are expressed as mean  $\pm$  standard deviation (SD), unless otherwise stated, and categorical data given in absolute numbers and percentages. Linear regression was used to determine trends in TVSx caseload per-annum over the study period, excluding 2018 to minimize ascertainment bias as the APDC database receives six-monthly updates. To identify predictors of mortality post open-TVSx, Cox proportional hazard regression method was used. Univariables considered include age (dichotomized by mean age), gender, admission referral source, year-groups of surgery (stratified into 2002-2005, 2006-2009, 2010-2013, 2014-2018), indication for surgery (infective endocarditis), rheumatic tricuspid valve status, types of open-TVSx, concomitant CABG, other cardiovascular and noncardiovascular comorbidities. Univariables with  $p < 0.05$  were included in the multivariable Cox regression analysis, except for age and gender which were included irrespective of significance. The proportional hazards assumption was checked with log-minus-log plots.

1  
2  
3  
4  
5 All analyses were performed using SPSS v25.0 (IBM, USA) and Stata 16.1. A two-tailed  
6 probability value  $<0.05$  was considered statistically significant. No sponsors had a role in  
7  
8 study design, data collection, data analysis, data interpretation, or writing of the report. All  
9  
10 authors had full access to all the data in the study, and the corresponding author had final  
11  
12 responsibility for the decision to submit for publication.  
13  
14  
15  
16  
17  
18  
19  
20  
21  
22  
23  
24  
25  
26  
27  
28  
29  
30  
31  
32  
33  
34  
35  
36  
37  
38  
39  
40  
41  
42  
43  
44  
45  
46  
47  
48  
49  
50  
51  
52  
53  
54  
55  
56  
57  
58  
59  
60

## RESULTS

### *Temporal trend of TV cases*

There were 575 cases of open isolated-TVSx in the calendar years of 2002 to 2018, averaging  $34 \pm 14$  cases per-annum (Supplementary Figure 1). There was a significant increase in case numbers by an average of 2.73 cases per-annum over the study period (95% CI 1.95-3.50,  $p < 0.001$ ) (Figure 1). The bulk of TVS cases were TV annuloplasty ( $n=272$ ) and replacement ( $n=245$ ), with case volume for both surgeries increasing during the study period (Supplementary Figures 2-3). A smaller number of non-annuloplasty TV repairs ( $n=85$ ) and valvotomies ( $n=5$ ) were performed. While there were significant increases in TV repair caseloads during the study period, TV valvotomy caseloads were so small as to preclude trend analysis (Supplementary Figures 4-5).

### *Baseline demographic and surgical characteristics of study cohort*

The study cohort's median age was 63.5yo (43.9-73.8yo) and was 46.4% male. (Table 1). A total of 14.3% of patients had concomitant CABG, and endocarditis was the indication for TVSx in 10.4% of patients. A rheumatic tricuspid valve was documented in 66.5% of patients.



**Table 1. Study cohort demographic and surgical characteristics.**

| Parameters                               | Isolated TVSx (N=537) |
|------------------------------------------|-----------------------|
| <b>Demographics</b>                      |                       |
| Age, years                               | 58.2 ± 20.1           |
| Median (IQR)                             | 63.5 (43.9 – 73.8)    |
| Males                                    | 249 (46.4)            |
| Country of birth                         |                       |
| Australia plus territories / New Zealand | 379 (70.6)            |
| Europe                                   | 77 (14.3)             |
| Asia                                     | 33 (6.1)              |
| Other                                    | 48 (8.9%)             |
| <b>Co-morbidities</b>                    |                       |
| Cardiovascular disease *                 | 454 (84.5)            |
| Ischemic heart disease                   | 104 (19.4)            |
| Prior PCI / CABG                         | 31 (5.8)              |
| Congestive cardiac failure               | 200 (37.2)            |
| Stroke                                   | 11 (2.0)              |
| Peripheral vascular disease              | 25 (4.7)              |
| Prosthetic heart valve                   | 59 (11.0)             |
| Atrial fibrillation/flutter              | 289 (53.8)            |
| Cardiac risk factors *                   | 323 (60.1)            |
| Hypertension                             | 138 (25.7)            |
| Hyperlipidaemia                          | 16 (3.0)              |
| Diabetes                                 | 82 (15.3)             |
| Current/ex-smoker                        | 198 (36.9)            |
| Primary PHT                              | 11 (2.0)              |
| Secondary PHT                            | 74 (13.8)             |
| Malignancy                               | 10 (1.9)              |
| Chronic pulmonary disease                | 31 (5.8)              |
| Neurodegenerative disease *              | 3 (0.6)               |
| Chronic kidney disease                   | 73 (13.6)             |
| IVDU history                             | 54 (10.1)             |
| Charlson comorbidity index score †       | 1.4 ± 1.9             |
| Median (IQR)                             | 1 (0 - 2)             |
| <b>Surgical characteristics</b>          |                       |
| Indication for valve surgery             |                       |
| Endocarditis                             | 56 (10.4)             |
| Non-endocarditis                         | 481 (89.6)            |
| Rheumatic tricuspid valve                | 357 (66.5)            |
| Concomitant CABG ‡                       | 77 (14.3)             |
| Types of TVSx §                          |                       |
| Annuloplasty                             | 262 (48.8)            |
| Replacement                              | 217 (40.4)            |
| Repair                                   | 83 (15.5)             |
| Open valvotomy                           | 5 (0.9)               |

|                               |              |
|-------------------------------|--------------|
| Others                        | 15 (2.8)     |
| Length of hospital stay, days | 24.4 ± 23.5  |
| Median (IQR)                  | 16 (10 – 31) |

Plus-minus values represent mean ± standard deviation; all others represent numbers of patients with values in brackets representing percentages, or otherwise stated.

CABG, coronary artery bypass graft; IVDU, intravenous drug use; PCI, percutaneous coronary interventions; PHT, pulmonary hypertension; TVSx, tricuspid valve surgery.

- \* Cardiovascular disease includes history of ischemic heart disease (include PCI and/or CABG), stroke, congestive cardiac failure, peripheral vascular disease, prosthetic heart valve and/or atrial fibrillation/flutter. Cardiac risk factors include history of hypertension, hyperlipidaemia, diabetes and/or smoking (current/previous). Neurodegenerative disease includes dementia, central nervous systemic atrophies, Parkinson's disease, basal ganglia degeneration, and/or nervous systemic degenerative diseases.
- † Conditions included in the Charlson comorbidity index include myocardial infarction, congestive cardiac failure, peripheral vascular disease, stroke, dementia, chronic pulmonary disease, connective tissue disease, peptic ulcer disease, liver disease (mild vs. moderate to severe), diabetes (with or without organ damage), hemiplegia, moderate to severe renal disease, any tumour (within last 5 years), lymphoma, leukemia, metastatic solid tumour and acquired immunodeficiency syndrome.
- ‡ Concomitant CABG performed during same admission for cardiac valve surgery.
- § More than one type of TV surgery might be performed on a patient during the same admission.

AF was the most common cardiovascular comorbidity (58.3%), followed by CCF (37.2%) and ischemic heart disease (19.4%). A history of smoking (36.9%), hypertension (25.7%), and diabetes (15.3%) was common. Of the noncardiovascular comorbidities, secondary pulmonary hypertension (13.8%) and chronic kidney disease (13.6%) were the most common. Concomitant malignancy was rare, comprising 1.9% of the cohort. 10.1% had a documented history of IVDU. The median Charlson comorbidity index was 1 (interquartile range [IQR] 0-2). The median length of stay was 16 days (IQR 10-31 days).

#### *All-cause and cause-specific mortality*

A total of 211 (39.3%) patients died during a mean follow-up of 4.82 ± 3.94 years (Table 2). In-hospital mortality rate was 7.4%, with 62 (11.5%) patients dying within 180-days post open isolated-TVSx. A cardiovascular cause of death occurred in 45% of in-hospital deaths,

and in 52% of post-discharge deaths (Table 3). Of the cardiovascular causes of death, heart failure was the most frequent cause, representing 10.0% (n=4) of in-hospital deaths and 25.2% (n=43) of post-discharge deaths. Sepsis was the most identified noncardiovascular cause of death, documented in 7 (17.5%) in-hospital deaths and 37 (21.6%) post-discharge deaths.

**Table 2. Morbidity and mortality outcomes following isolated TVSx.**

| Cumulative incidence, no. (%)          | 30-days         | 180-days         | 2-years           | End-of-study <sup>†</sup> |
|----------------------------------------|-----------------|------------------|-------------------|---------------------------|
| Congestive cardiac failure             | 11 (2.0)        | 53 (9.9)         | 109 (20.2)        | 157 (29.2)                |
| Atrial fibrillation *                  | 10 (4.0)        | 25 (10.1)        | 40 (16.1)         | 68 (27.4)                 |
| Infective endocarditis *               | 4 (0.9)         | 7 (1.5)          | 10 (2.1)          | 26 (5.6)                  |
| Pulmonary embolism                     | 1 (0.2)         | 2 (0.4)          | 5 (0.9)           | 7 (1.3)                   |
| Permanent pacemaker                    | 2 (0.4)         | 3 (0.6)          | 20 (3.7)          | 40 (7.5)                  |
| Implantable cardioverter defibrillator | 1 (0.2)         | 3 (0.6)          | 4 (0.8)           | 13 (2.4)                  |
| <b>All-cause death</b>                 | <b>18 (3.4)</b> | <b>62 (11.5)</b> | <b>108 (20.1)</b> | <b>211 (39.3)</b>         |

\* Atrial fibrillation (AF) and infective endocarditis (IE) incidences were based on patients without baseline AF (n=248) or IE (n=466) during isolated tricuspid valve surgery (TVSx) admission.

<sup>†</sup> End-of-study was 31-December-2018.

**Table 3. Cause-specific death outcomes.**

| Categories                      | In-hospital (N=40) | Post-discharge (N=171) |
|---------------------------------|--------------------|------------------------|
|                                 | No. (%) *          | No. (%) *              |
| <b>Cardiovascular causes</b>    | <b>18 (45.0)</b>   | <b>89 (52.0)</b>       |
| Acute myocardial infarction     | 0 (0)              | 6 (3.5)                |
| Heart failure                   | 7 (17.5)           | 43 (25.2)              |
| Stroke                          | 4 (10.0)           | 15 (8.8)               |
| Pulmonary embolism              | 0 (0)              | 2 (1.17)               |
| Cardiac-related <sup>†</sup>    | 7 (17.5)           | 23 (13.5)              |
| <b>Noncardiovascular causes</b> | <b>22 (55.0)</b>   | <b>82 (48.0)</b>       |
| Sepsis                          | 7 (17.5)           | 37 (21.6)              |
| Malignancy                      | 1 (2.5)            | 15 (8.8)               |
| Other                           | 7 (17.5)           | 17 (10.0)              |
| Undefined                       | 7 (17.5)           | 13 (7.6)               |

\* No. (%) represents total number of deaths from each specific cause and value in brackets represents the percentage out of total deaths.

<sup>†</sup> Cardiac-related cause of death is coded when more than one cardiac cause of death is recorded on the death certificate.

### *Morbidity outcomes*

Table 2 shows the cumulative incidence of the study's pre-specified morbidity events after isolated-TVSx. The development of new AF (in those without a prior history of AF at index isolated-TVSx) and admissions for CCF were the most frequent morbidities documented during follow-up: the cumulative incidence of AF at 180-days and by end-of-study were 10.1% and 27.4% of patients respectively, while 53 (9.9%) patients had an admission for CCF within the first 180-days following isolated-TVSx, reaching 29.2% by end-of-study follow-up. Across the study period the rate of PE admission was low at 1.3%. 10.0% of patients had PPM implanted during their index isolated-TVSx admission. A further 40 (7.5%) and 13 (2.4%) patients required PPM and ICD implantations by end-of-study follow-up respectively.

### *Independent predictors for all-cause mortality*

Independent predictors for all-cause mortality following open isolated-TVSx were age  $\geq 59$  years, a background history of CCF, chronic pulmonary disease, and malignancy (Table 4). Malignancy was the strongest predictor of mortality (adjusted hazard ratio [aHR]=3.49, 95% confidence interval [CI]=1.73-7.07;  $p < 0.001$ ), followed by a history of chronic pulmonary disease (aHR=2.21, 95%CI=1.36-3.59;  $p < 0.001$ ). Neither gender, indication for surgery, rheumatic TV status, types of TVSx performed, concomitant CABG, history of ischemic heart disease, stroke, diabetes, pulmonary hypertension, chronic kidney disease, smoking status or history of IVUDU were associated with the primary outcome (Supplementary Tables 2 and 3).

**Table 4. Independent predictors for all-cause mortality.**

| <b>Multivariable analysis *</b>                             | <b>Parameters</b>          | <b>aHR (95% CI)</b> | <b>p value</b> |
|-------------------------------------------------------------|----------------------------|---------------------|----------------|
| <b>All-cause death during follow-up (4.82 ± 3.94 years)</b> | Age ≥59 years (mean age)   | 1.76 (1.26 – 2.47)  | 0.001          |
|                                                             | Congestive cardiac failure | 1.78 (1.33 – 2.38)  | <0.001         |
|                                                             | Chronic pulmonary disease  | 2.21 (1.36 – 3.59)  | <0.001         |
|                                                             | Malignancy                 | 3.49 (1.73 – 7.07)  | <0.001         |

Plus-minus value represents mean ± standard deviation.

CI, confidence interval; aHR, adjusted hazard ratio.

\* Multivariable Cox regression method was used to identify independent predictors for all-cause mortality. Only significant independent predictors are shown in the above table (see Supplementary Table 3 for complete multivariable analysis results).

## DISCUSSION

The present study examined the caseload and outcomes of open isolated-TVSx over a 17-year period in an unselected Australian statewide population. The main findings were: 1) open isolated-TVSx case volumes have increased significantly over the study period; 2) high post-operative mortality rates in the short and intermediate-term comparable to those in international studies; 3) heart failure and sepsis were the most common specific causes of death in both in-hospital and post-discharge follow-up; 4) new AF and admissions for CCF were the two most common morbidities encountered post-surgery; and, 5) age  $\geq 59$  years and history of CCF, chronic pulmonary disease and malignancy were associated with increased mortality risk.

### *TVSx caseloads*

Alqahtani et al demonstrated a significant increase in the caseload of both open isolated-TV repairs and replacements in the United States (US) between 2003 and 2014 using the Nationwide Inpatient Sample (NIS) (11). While the NIS captured about 20% of US admissions during this period, our study showed similarly increasing caseload findings in a statewide population where  $\geq 97\%$  of hospital admissions are captured, with the state of NSW approximating 32% of Australia's overall population. While the increase in caseload was significant, the procedure is still relatively rare as shown in our study, with open isolated-TVSx cases representing only 1.8% of total open-heart cardiac valve surgery. We postulate the increased caseload reflects the growth and ageing of the NSW population over this timeframe.

1  
2  
3  
4  
5  
6 *Prior studies mostly limited to in-hospital outcomes*  
7  
8  
9

10 Existing literature has been mostly limited to in-hospital outcomes after open isolated-TVSx.  
11  
12 There are two larger US-based studies examining in-hospital mortality and morbidity in  
13  
14 addition to several smaller studies (11, 32). Our study showed an in-hospital mortality (7.4%)  
15  
16 that is lower than the 8.8-9.7% reported in recent studies using similar administrative datasets  
17  
18 (11, 18), but higher than the 3.4% rate reported in a recent single-centre study based on  
19  
20 carefully selected patients (19). In-hospital PPM implantation rates (10.0%) in our study  
21  
22 were also at the lower end of reported figures, which range from 9.5-24.4% (11, 19, 32).  
23  
24  
25  
26  
27

28 *Cause-specific deaths following open isolated-TVSx*  
29  
30  
31  
32

33 This study is the first of its scale to examine cause-specific mortality after isolated TVSx.  
34  
35 The two leading causes of death both in-hospital and post-discharge were sepsis and CCF.  
36  
37 Fatal decompensated CCF may reflect unsuccessful attempted medical and/or surgical  
38  
39 management of severe TV regurgitation with associated heart failure – indeed a history of  
40  
41 CCF predicted a near 70% increased mortality risk in our multivariable analysis. On the other  
42  
43 hand, the large proportion of deaths by sepsis are likely driven by the baseline comorbidities  
44  
45 in our population. This is supported by our study's demonstration of strong independent  
46  
47 associations between increased mortality and the presence of malignancy, older age and  
48  
49 chronic pulmonary disease. While more conservative case selection may reduce mortality  
50  
51  
52  
53  
54  
55  
56  
57  
58  
59  
60

1  
2  
3 rates, the goal of surgery in these unwell patients may have been to improve quality of life (a  
4 parameter not directly measured in this administrative dataset) rather than longevity.  
5  
6  
7

### 8 9 10 *Morbidity following open isolated-TVSx*

11  
12  
13  
14 Morbidity after TVSx may provide a surrogate for quality of life, and providing data  
15 surrounding long-term morbidity forms an important aspect of informed consent prior to  
16 surgery. These data also form a benchmark against which to compare newer percutaneous  
17 interventions. In the present study, the main morbidities encountered post-discharge were re-  
18 admission for decompensated CCF (9.9%) and new AF (10.1%), although low rates of  
19 admissions for IE, PE, PPM and ICD insertions (all <1% except for IE at 1.5%) were also  
20 observed within the first 180-days. Two smaller studies have examined medium-long term  
21 morbidity outcomes following open isolated-TVSx. Dreyfus et al described a 38% incidence  
22 of heart failure hospitalisation at 5-years post-discharge in a French cohort of 466 patients  
23 who underwent isolated-TVSx (33). Wong et al described a much lower rate of 13.8% heart  
24 failure hospitalisation post-discharge during a mean follow-up of 4.9 years in a younger  
25 Taiwanese cohort (n=333) compared to 29.2% of patients in our study with a similar mean  
26 follow-up duration (34). While Dreyfus et al did not report on rates of post-discharge PPM  
27 insertion, Wong et al observed a 5.2% incidence of post-discharge PPM insertion by end-of-  
28 study, compared to 7.6% in our study. Notably, these and other studies have not reported on  
29 rates of PE, ICD insertion, or de novo infective endocarditis post-discharge. Reassuringly,  
30 these events appear to be low.  
31  
32  
33  
34  
35  
36  
37  
38  
39  
40  
41  
42  
43  
44  
45  
46  
47  
48  
49  
50  
51  
52  
53  
54  
55  
56  
57  
58  
59  
60



1  
2  
3 *Pathomechanistic reasons for high mortality and morbidity associated with open-heart*  
4  
5 *isolated-TVSx*  
6  
7  
8  
9

10 There are two main hypotheses which attempt to explain why open isolated-TVSx has  
11 consistently been associated with high in-hospital mortality and morbidity rates, despite not  
12 being considered technically more difficult than left sided-valvular surgery. The first is that  
13 patients are referred late for surgery, by which time the consequences of severe TR are, at  
14 best, partly remediable by surgery (e.g., right ventricular (RV) dilation and/or dysfunction,  
15 cardiac cirrhosis) (32, 33). Furthermore, patients with impaired RV size and/or function may  
16 not tolerate the increased afterload created by surgical correction of TR, and consequently  
17 further decompensate. Supporting this hypothesis, Hamandi et al (19) reported a dramatically  
18 lower in-hospital mortality of 3.2%, highlighting early referral as a defining feature of their  
19 single-centre 95 patient cohort study. However, in-hospital mortality in their cohort was still  
20 higher than that reported for left-sided valve surgery in the literature (11, 16-18). The second  
21 hypothesis is that severe TR patients form a more comorbid cohort of patients, whose  
22 comorbidities often exacerbate the severity of their TR. (e.g. pulmonary disease). Indeed, our  
23 study showed chronic pulmonary disease to be associated with a 2.7-fold increased risk of  
24 death post-surgery.  
25  
26  
27  
28  
29  
30  
31  
32  
33  
34  
35  
36  
37  
38  
39  
40  
41  
42  
43  
44  
45  
46

47 *Comparison with percutaneous tricuspid valve interventions*  
48  
49  
50

51 There is presently little published data on outcomes following isolated TV intervention, and  
52 no long-term data. Published international registry data (n=312) has reported a 30-day all-  
53  
54  
55  
56  
57  
58  
59  
60

1  
2  
3 cause mortality rate of 3.6% following percutaneous TV intervention, varying depending on  
4 the technique used from 2.8% with MitraClip to 7.6% with Cardioband (mean age 76.6yo)  
5  
6 (35). More recently, the TRILUMINATE trial (n=85), an international, prospective, single  
7  
8 arm study examining safety and efficacy of the TriClip edge-to-edge repair system, reported  
9  
10 a 1-year all-cause mortality rate of 7.1% (36). Mean ages for patients in both above trials  
11  
12 were greater than 75 years of age. While comparison between isolated-TVSx and  
13  
14 percutaneous interventions is currently limited by their different cohorts with respect to age,  
15  
16 comorbidities, and indication, our data forms an important benchmark against which to  
17  
18 compare emerging data on mid-long term outcomes following percutaneous TV intervention.  
19  
20  
21  
22  
23  
24  
25

### 26 *Strengths and limitations*

27  
28  
29  
30

31 This study's strengths lie in the large cohort of patients who underwent open isolated-TVSx,  
32  
33 a relatively rare procedure compared to other cardiac valve surgery. In addition, our study  
34  
35 cohort was derived from a statewide unselected population and included patients from all  
36  
37 public and private healthcare facilities that performed cardiothoracic surgery, thus reflecting  
38  
39 real-world clinical practice. Our long study period also allows for longitudinal trend analysis  
40  
41 of medium to long-term outcomes including identifying important clinical predictors of  
42  
43 mortality. The use of a death registry with cause-specific data analysis adds important detail  
44  
45 to all-cause mortality figures.  
46  
47  
48  
49  
50

51 However, this study is limited by its retrospective study design, which limits the imputation  
52  
53 of causal links in our multivariable analysis. There was also no propensity-matched control  
54  
55  
56  
57  
58  
59  
60

1  
2  
3 group that did not undergo surgery against which to compare outcomes post TVSx.  
4  
5 Additionally, this is an observational study reflecting current practise on isolated TVSx  
6  
7 which includes a heterogeneous group of procedures (e.g. annuloplasty, repair, replacement)  
8  
9 with less clear evidence on the best approach compared to aortic or mitral valve procedures.  
10  
11 Furthermore, our administrative data lacks important granular details such as  
12  
13 echocardiographic data (e.g. RV size and function), functional class, medication usage, exact  
14  
15 aetiology of TV disease, or indication for surgery (longevity vs quality of life). This speaks  
16  
17 to the need for a national registry of tricuspid valve surgeries with such granular detail,  
18  
19 especially with the development of newer TV interventions.  
20  
21  
22  
23  
24  
25

## 26 **CONCLUSION**

27  
28  
29  
30  
31 Open isolated-TVSx carries a significant risk of post-operative mortality, with admission for  
32  
33 decompensated CCF and new AF the most common morbidities encountered post-surgery.  
34  
35 Independent predictors of mortality include age  $\geq 59$ yo and comorbidities including history of  
36  
37 cardiac failure, chronic pulmonary disease and malignancy. This study forms a benchmark  
38  
39 against which to compare outcomes with newer percutaneous TV interventions.  
40  
41  
42  
43  
44  
45  
46  
47  
48  
49  
50  
51  
52  
53  
54  
55  
56  
57  
58  
59  
60

1  
2  
3 **Acknowledgements:** Nil  
4  
5  
6  
7

8 **Author Contributions:** GH, VC, IR, DB, LK and AN were responsible for study concept  
9 and design; data collection, analysis, and interpretation; and manuscript preparation. GH and  
10 AN drafted the initial manuscript, and all authors contributed to data interpretation and  
11 critical revision of the report. All authors had full access to all the data (including statistical  
12 reports and tables) in the study and can take responsibility for the integrity of the data and the  
13 accuracy of the data analysis. AN is the guarantor.  
14  
15  
16  
17  
18  
19  
20  
21  
22  
23  
24  
25  
26  
27  
28  
29  
30  
31  
32  
33  
34  
35  
36  
37  
38  
39  
40  
41  
42  
43  
44  
45  
46  
47  
48  
49  
50  
51  
52  
53  
54  
55  
56  
57  
58  
59  
60

**REFERENCES**

1. Topilsky Y, Maltais S, Medina Inojosa J, Oguz D, Michelena H, Maalouf J, et al. Burden of tricuspid regurgitation in patients diagnosed in the community setting. *JACC: Cardiovascular Imaging*. 2019;12(3):433-42.
2. Nath J, Foster E, Heidenreich PA. Impact of tricuspid regurgitation on long-term survival. *Journal of the American College of Cardiology*. 2004;43(3):405-9.
3. Ruel M, Rubens FD, Masters RG, Pipe AL, Bédard P, Mesana TG. Late incidence and predictors of persistent or recurrent heart failure in patients with mitral prosthetic valves. *The Journal of thoracic and cardiovascular surgery*. 2004;128(2):278-83.
4. Hahn RT, Asch F, Weissman NJ, Grayburn P, Kar S, Lim S, et al. Impact of tricuspid regurgitation on clinical outcomes: the COAPT trial. *Journal of the American College of Cardiology*. 2020;76(11):1305-14.
5. Mehr M, Karam N, Taramasso M, Ouarrak T, Schneider S, Lurz P, et al. Combined tricuspid and mitral versus isolated mitral valve repair for severe MR and TR: an analysis from the TriValve and TRAMI registries. *Cardiovascular Interventions*. 2020;13(5):543-50.
6. McCarthy FH, Vemulapalli S, Li Z, Thourani V, Matsouaka RA, Desai ND, et al. Association of tricuspid regurgitation with transcatheter aortic valve replacement outcomes: a report from the Society of Thoracic Surgeons/American College of Cardiology Transcatheter Valve Therapy Registry. *The Annals of Thoracic Surgery*. 2018;105(4):1121-8.
7. Benfari G, Antoine C, Miller WL, Thapa P, Topilsky Y, Rossi A, et al. Excess mortality associated with functional tricuspid regurgitation complicating heart failure with reduced ejection fraction. *Circulation*. 2019;140(3):196-206.

- 1  
2  
3 8. Chen L, Larsen CM, Le RJ, Connolly HM, Pislaru SV, Murphy JG, et al. The  
4 prognostic significance of tricuspid valve regurgitation in pulmonary arterial hypertension.  
5 The Clinical Respiratory Journal. 2018;12(4):1572-80.  
6  
7  
8  
9  
10 9. Pinamonti B, Dragos AM, Pyxaras SA, Merlo M, Pivetta A, Barbati G, et al.  
11 Prognostic predictors in arrhythmogenic right ventricular cardiomyopathy: results from a 10-  
12 year registry. European heart journal. 2011;32(9):1105-13.  
13  
14  
15  
16  
17 10. Topilsky Y, Nkomo VT, Vatury O, Michelena HI, Letourneau T, Suri RM, et al.  
18 Clinical outcome of isolated tricuspid regurgitation. JACC: Cardiovascular Imaging.  
19 2014;7(12):1185-94.  
20  
21  
22  
23  
24 11. Alqahtani F, Berzingi CO, Aljohani S, Hijazi M, Al-Hallak A, Alkhouli M.  
25 Contemporary trends in the use and outcomes of surgical treatment of tricuspid regurgitation.  
26 Journal of the American Heart Association. 2017;6(12):e007597.  
27  
28  
29  
30  
31 12. Nishimura RA, Otto CM, Bonow RO, Carabello BA, Erwin JP, Guyton RA, et al.  
32 2014 AHA/ACC guideline for the management of patients with valvular heart disease:  
33 executive summary: a report of the American College of Cardiology/American Heart  
34 Association Task Force on Practice Guidelines. Journal of the American College of  
35 Cardiology. 2014;63(22):2438-88.  
36  
37  
38  
39  
40  
41  
42 13. Falk V, Baumgartner H, Bax JJ, De Bonis M, Hamm C, Holm PJ, et al. 2017  
43 ESC/EACTS Guidelines for the management of valvular heart disease. European Journal of  
44 Cardio-Thoracic Surgery. 2017;52(4):616-64.  
45  
46  
47  
48  
49 14. Otto CM, Nishimura RA, Bonow RO, Carabello BA, Erwin III JP, Gentile F, et al.  
50 2020 ACC/AHA guideline for the management of patients with valvular heart disease:  
51 executive summary: a report of the American College of Cardiology/American Heart  
52 Association Task Force on Practice Guidelines. Journal of the American College of  
53 Cardiology. 2020;69(12):e179-263.  
54  
55  
56  
57  
58  
59  
60

- 1  
2  
3 Association Joint Committee on Clinical Practice Guidelines. Journal of the American  
4 College of Cardiology. 2021;77(4):450-500.  
5  
6  
7  
8 15. Vahanian A, Beyersdorf F, Praz F, Milojevic M, Baldus S, Bauersachs J, et al. 2021  
9 ESC/EACTS Guidelines for the management of valvular heart disease: developed by the  
10 Task Force for the management of valvular heart disease of the European Society of  
11 Cardiology (ESC) and the European Association for Cardio-Thoracic Surgery (EACTS).  
12 European heart journal. 2022;43(7):561-632.  
13  
14  
15 16. Staab ME, Nishimura RA, Dearani JA. Isolated tricuspid valve surgery for severe  
16 tricuspid regurgitation following prior left heart valve surgery: analysis of outcome in 34  
17 patients. Journal of Heart Valve Disease. 1999;8(5):567-74.  
18  
19  
20 17. Do QB, Pellerin M, Carrier M, Cartier R, Hebert Y, Page P, et al. Clinical outcome  
21 after isolated tricuspid valve replacement: 20-year experience. The Canadian journal of  
22 cardiology. 2000;16(4):489-93.  
23  
24  
25 18. Zack CJ, Fender EA, Chandrashekar P, Reddy YN, Bennett CE, Stulak JM, et al.  
26 National trends and outcomes in isolated tricuspid valve surgery. Journal of the American  
27 College of Cardiology. 2017;70(24):2953-60.  
28  
29  
30 19. Hamandi M, Smith RL, Ryan WH, Grayburn PA, Vasudevan A, George TJ, et al.  
31 Outcomes of isolated tricuspid valve surgery have improved in the modern era. The Annals  
32 of thoracic surgery. 2019;108(1):11-5.  
33  
34  
35 20. Chorin E, Rozenbaum Z, Topilsky Y, Konigstein M, Ziv-Baran T, Richert E, et al.  
36 Tricuspid regurgitation and long-term clinical outcomes. European Heart Journal-  
37 Cardiovascular Imaging. 2020;21(2):157-65.  
38  
39  
40  
41  
42  
43  
44  
45  
46  
47  
48  
49  
50  
51  
52  
53  
54  
55  
56  
57  
58  
59  
60

- 1  
2  
3 21. Russo A, Grigioni F, Avierinos J-F, Freeman WK, Suri R, Michelena H, et al.  
4  
5 Thromboembolic complications after surgical correction of mitral regurgitation: incidence,  
6  
7 predictors, and clinical implications. *Journal of the American College of Cardiology*.  
8  
9 2008;51(12):1203-11.  
10  
11  
12 22. Thourani VH, Kodali S, Makkar RR, Herrmann HC, Williams M, Babaliaros V, et al.  
13  
14 Transcatheter aortic valve replacement versus surgical valve replacement in intermediate-risk  
15  
16 patients: a propensity score analysis. *The Lancet*. 2016;387(10034):2218-25.  
17  
18  
19 23. Centre for Health Record Linkage (CHeReL). Available at <http://www.cherel.org.au>.  
20  
21  
22 24. Lee A-H, Ng ACC, Yong ASC, Hyun K, Brieger D, Kritharides L, et al. Outcomes of  
23  
24 1,098 patients following transcatheter aortic valve implantation: a statewide population-  
25  
26 linkage cohort study. *Heart, Lung and Circulation*. 2021;30(8):1213-20.  
27  
28  
29 25. Cheng Y-Y, Brieger D, Bannon P, Chow V, Kritharides L, Ng ACC. Outcomes  
30  
31 Following Triple Cardiac Valve Surgery Over 17-years: A Multicentre Population-Linkage  
32  
33 Study. *Heart, Lung and Circulation*. 2022.  
34  
35  
36 26. Ng AC, Chung T, Yong AS, Wong HS, Chow V, Celermajer DS, et al. Long-term  
37  
38 cardiovascular and noncardiovascular mortality of 1023 patients with confirmed acute  
39  
40 pulmonary embolism. *Circ Cardiovasc Qual Outcomes*. 2011;4(1):122-8.  
41  
42  
43 27. Ng ACC, Lau JK, Chow V, Adikari D, Brieger D, Kritharides L. Outcomes of 4838  
44  
45 patients requiring temporary transvenous cardiac pacing: a statewide cohort study.  
46  
47 *International Journal of Cardiology*. 2018;271:98-104.  
48  
49  
50 28. Brieger DB, Ng AC, Chow V, D'Souza M, Hyun K, Bannon PG, et al. Falling  
51  
52 hospital and postdischarge mortality following CABG in New South Wales from 2000 to  
53  
54 2013. *Open Heart*. 2019;6(1):e000959.  
55  
56  
57  
58  
59  
60



- 1  
2  
3 29. Cheng Y-Y, Chow V, Brieger D, Yan TD, Kritharides L, Ng ACC. Outcomes of  
4 16,436 patients requiring isolated aortic valve surgery: A statewide cohort study.  
5  
6 International Journal of Cardiology. 2021;326:55-61.  
7  
8  
9  
10 30. Charlson ME, Pompei P, Ales KL, MacKenzie CR. A new method of classifying  
11 prognostic comorbidity in longitudinal studies: development and validation. J Chronic Dis.  
12 1987;40(5):373-83.  
13  
14  
15 31. National Center for Health Statistics. Instructions for Classifying the Underlying  
16 Cause-of-Death, ICD-10. 2008:1-259. <http://www.cdc.gov/nchs/about/major/dvs/im.htm>  
17 Accessed June 10, 2009.  
18  
19  
20  
21  
22  
23 32. Kawsara A, Alqahtani F, Nkomo VT, Eleid MF, Pislaru SV, Rihal CS, et al.  
24 Determinants of morbidity and mortality associated with isolated tricuspid valve surgery.  
25 Journal of the American Heart Association. 2021;10(2):e018417.  
26  
27  
28  
29  
30 33. Dreyfus J, Flagiello M, Bazire B, Eggenpieler F, Viau F, Riant E, et al. Isolated  
31 tricuspid valve surgery: impact of aetiology and clinical presentation on outcomes. European  
32 Heart Journal. 2020;41(45):4304-17.  
33  
34  
35  
36  
37 34. Wong WK, Chen SW, Chou AH, Lee HA, Cheng YT, Tsai FC, et al. Late outcomes  
38 of valve repair versus replacement in isolated and concomitant tricuspid valve surgery: a  
39 nationwide cohort study. Journal of the American Heart Association. 2020;9(8):e015637.  
40  
41  
42  
43 35. Taramasso M, Alessandrini H, Latib A, Asami M, Attinger-Toller A, Biasco L, et al.  
44 Outcomes after current transcatheter tricuspid valve intervention: mid-term results from the  
45 international TriValve registry. JACC: Cardiovascular Interventions. 2019;12(2):155-65.  
46  
47  
48  
49  
50  
51  
52  
53  
54  
55  
56  
57  
58  
59  
60

- 1  
2  
3 36. Lurz P, Stephan von Bardeleben R, Weber M, Sitges M, Sorajja P, Hausleiter J, et al.  
4  
5 Transcatheter edge-to-edge repair for treatment of tricuspid regurgitation. Journal of the  
6  
7 American College of Cardiology. 2021;77(3):229-39.  
8  
9  
10  
11  
12  
13  
14  
15  
16  
17  
18  
19  
20  
21  
22  
23  
24  
25  
26  
27  
28  
29  
30  
31  
32  
33  
34  
35  
36  
37  
38  
39  
40  
41  
42  
43  
44  
45  
46  
47  
48  
49  
50  
51  
52  
53  
54  
55  
56  
57  
58  
59  
60

For peer review only

**Figure 1. Temporal trend of annual isolated tricuspid valve surgical volume during study period.**

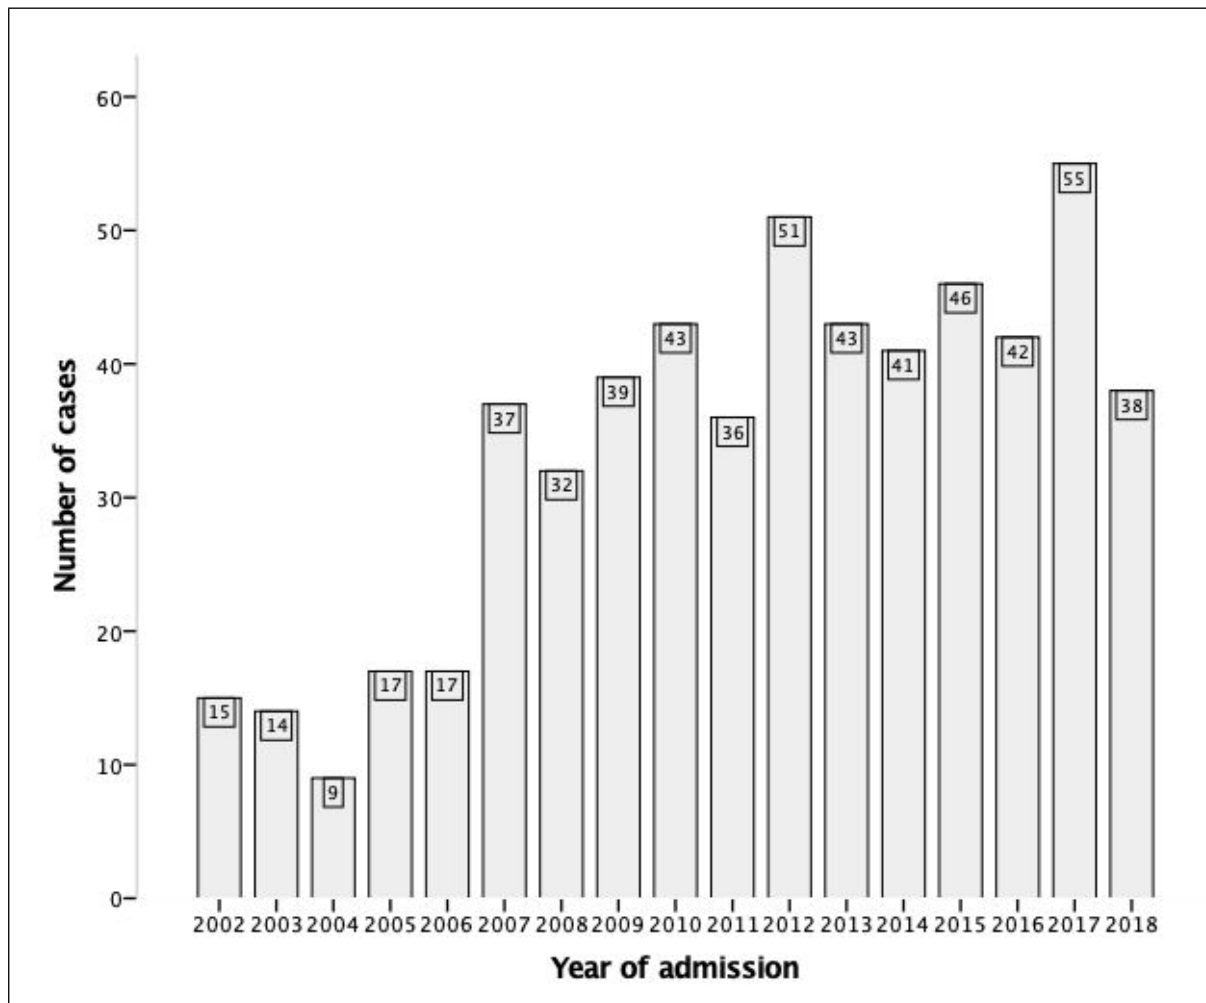

**Figure Legend**

Figure shows temporal trend of annual volume of isolated tricuspid valve surgery during study period (n=575), with a mean ( $\pm$ SD) of  $34 \pm 14$  cases per-annum. Annual case volumes significantly increased over the study period with an average rise of 2.73 cases per year (95% CI 1.95-3.50,  $p < 0.001$ ).

1  
2  
3  
4  
5  
6  
7  
8  
9  
10  
11  
12  
13  
14  
15  
16  
17  
18  
19  
20  
21  
22  
23  
24  
25  
26  
27  
28  
29  
30  
31  
32  
33  
34  
35  
36  
37  
38  
39  
40  
41  
42  
43  
44  
45  
46  
47  
48  
49  
50  
51  
52  
53  
54  
55  
56  
57  
58  
59  
60

**SUPPLEMENTARY MATERIAL**

**Morbidity and Mortality Outcomes of Patients requiring Isolated Tricuspid Valve Surgery**

**Harvey et al.**

For peer review only

## Table of Contents

**Supplementary Table 1.** Study comorbidities International Classification of Diseases Tenth Revision Australian Modification (ICD-10AM) codes and Australian Classification of Health Interventions (ACHI) procedural codes

**Supplementary Table 2.** Univariable associations with all-cause mortality during study period

**Supplementary Table 3.** Independent predictors for all-cause mortality during study period

**Supplementary Figure 1.** Study flow chart

**Supplementary Figure 2.** Temporal trend of tricuspid valve annuloplasty during study period

**Supplementary Figure 3.** Temporal trend of tricuspid valve replacement during study period

**Supplementary Figure 4.** Temporal trend of open tricuspid valvotomy during study period

**Supplementary Figure 5.** Temporal trend of tricuspid valve repair during study period

**Supplementary Table 1. Study comorbidities International Classification of Diseases Tenth Revision Australian Modification (ICD-10AM) codes and Australian Classification of Health Interventions (ACHI) procedural codes**

| No. | Comorbidity *                                                                                                                                                                          | ICD-10AM codes                                                                                                                                                                                                                                                                                |
|-----|----------------------------------------------------------------------------------------------------------------------------------------------------------------------------------------|-----------------------------------------------------------------------------------------------------------------------------------------------------------------------------------------------------------------------------------------------------------------------------------------------|
| 1   | Endocarditis<br>(indication for cardiac valve surgery)                                                                                                                                 | I33, I38, I39                                                                                                                                                                                                                                                                                 |
| 2   | Atrial fibrillation/flutter                                                                                                                                                            | I48                                                                                                                                                                                                                                                                                           |
| 3   | Acute myocardial infarction                                                                                                                                                            | I21, I22, I23                                                                                                                                                                                                                                                                                 |
| 4   | Ischemic heart disease                                                                                                                                                                 | I20, I21, I22, I23, I24, I25                                                                                                                                                                                                                                                                  |
| 5   | Prior PCI / CABG                                                                                                                                                                       | Z95.1, Z95.5                                                                                                                                                                                                                                                                                  |
| 6   | Congestive cardiac failure                                                                                                                                                             | I42, I43, I50, I11.0, I13.0, I13.2                                                                                                                                                                                                                                                            |
| 7   | Peripheral vascular disease                                                                                                                                                            | E09.5, E10.51, E10.52, E11.51, E11.52, E13.51, E13.52, E14.51, E14.52, I70, I71, I72, I73, I74, I77, I78, I79                                                                                                                                                                                 |
| 8   | Stroke                                                                                                                                                                                 | G45-45.9, G46-G46.8, I60, I61, I62, I63, I64                                                                                                                                                                                                                                                  |
| 9   | Prosthetic heart valve                                                                                                                                                                 | Z95.2, Z95.3, Z95.4                                                                                                                                                                                                                                                                           |
| 10  | Cardiovascular disease<br>(defined as morbidities item nos. 2, 4-9)                                                                                                                    | I48, I20-I25, Z95.1, Z95.5, I42, I43, I50, I11.0, I13.0, I13.2, I70, I71, I72, I73, I74, I77, I78, I79, E09.5, E10.51, E10.52, E11.51, E11.52, E13.51, E13.52, E14.51, E14.52, G45-45.9, G46-G46.8, I60-I62, I63-I64, Z95.2, Z95.3, Z95.4                                                     |
| 11  | Hypertension                                                                                                                                                                           | I10, I11, I12, I13, I15                                                                                                                                                                                                                                                                       |
| 12  | Hyperlipidaemia                                                                                                                                                                        | E78                                                                                                                                                                                                                                                                                           |
| 13  | Diabetes                                                                                                                                                                               | E09, E10, E11, E13, E14, Z92.22                                                                                                                                                                                                                                                               |
| 14  | Current/ex-smoker                                                                                                                                                                      | F17, Z72.0, Z86.43                                                                                                                                                                                                                                                                            |
| 15  | Cardiac risk factors<br>(defined as morbidities item nos. 11-14)                                                                                                                       | I10, I11, I12, I13, I15, E78, E09, E10, E11, E13, E14, Z92.22, Z72.0, F17, Z86.43                                                                                                                                                                                                             |
| 16  | Systemic connective tissue disease                                                                                                                                                     | M30, M31, M32, M33, M34, M35, M36                                                                                                                                                                                                                                                             |
| 17  | Chronic pulmonary disease<br>(include asthma, chronic airways limitation, interstitial lung disease, cystic fibrosis with pulmonary manifestation)                                     | E84.0, J40, J41, J42, J43, J44, J45, J46, J47, J60, J61, J62, J63, J64, J65, J66, J67, J68, J70, J82, J84, J99                                                                                                                                                                                |
| 18  | Malignancy                                                                                                                                                                             | C00-C96, D00-D09                                                                                                                                                                                                                                                                              |
| 19  | Chronic kidney disease                                                                                                                                                                 | N18, N19                                                                                                                                                                                                                                                                                      |
| 20  | Dementia                                                                                                                                                                               | F00, F01, F02, F03                                                                                                                                                                                                                                                                            |
| 21  | Neurodegenerative diseases<br>(defined as dementia, central nervous systemic atrophies, Parkinson's disease, basal ganglia degeneration and/or nervous systemic degenerative diseases) | F00, F01, F02, F03, G10-G14, G20, G23, G30, G31                                                                                                                                                                                                                                               |
| 22  | Peptic ulcer disease                                                                                                                                                                   | K25, K26, K27, K28                                                                                                                                                                                                                                                                            |
| 23  | Liver disease – mild                                                                                                                                                                   | K70.0, K70.1, K70.2, K70.9, K71.0, K71.1, K71.2, K71.3, K71.4, K71.5, K71.6, K71.8, K71.9, K73, K75, K76, K77                                                                                                                                                                                 |
| 24  | Liver disease – moderate-severe                                                                                                                                                        | I82.0, K70.3, K70.4, K71.7, K72, K74                                                                                                                                                                                                                                                          |
| 25  | Chronic kidney disease – moderate-severe                                                                                                                                               | N18.3, N18.4, N18.5                                                                                                                                                                                                                                                                           |
| 26  | Diabetes with organ damage                                                                                                                                                             | E09.21, E09.29, E09.31, E09.32, E09.40, E09.42, E09.51, E09.52, E09.71, E09.72, E09.8, E10.21, E10.22, E10.29, E10.31, E10.32, E10.33, E10.34, E10.35, E10.36, E10.39, E10.40, E10.41, E10.42, E10.43, E10.49, E10.51, E10.52, E10.53, E10.61, E10.62, E10.63, E10.69, E10.71, E10.73, E10.8, |

|    |                                                         |                                                                                                                                                                                                                                                                                                                                                                                                                                                                                                                                                                                                                                             |
|----|---------------------------------------------------------|---------------------------------------------------------------------------------------------------------------------------------------------------------------------------------------------------------------------------------------------------------------------------------------------------------------------------------------------------------------------------------------------------------------------------------------------------------------------------------------------------------------------------------------------------------------------------------------------------------------------------------------------|
|    |                                                         | E11.21, E11.22, E11.29, E11.31, E11.32, E11.33, E11.34, E11.35, E11.36, E11.39, E11.40, E11.41, E11.42, E11.43, E11.49, E11.51, E11.52, E11.53, E11.61, E11.62, E11.63, E11.69, E11.71, E11.72, E11.73, E11.8, E13.21, E13.22, E13.29, E13.31, E13.32, E13.33, E13.34, E13.35, E13.36, E13.39, E13.40, E13.41, E13.42, E13.43, E13.49, E13.51, E13.52, E13.53, E13.61, E13.62, E13.63, E13.69, E13.71, E13.72, E13.73, E13.8, E14.21, E14.22, E14.29, E14.31, E14.32, E14.33, E14.34, E14.35, E14.36, E14.39, E14.40, E14.41, E14.42, E14.43, E14.49, E14.51, E14.52, E14.53, E14.61, E14.62, E14.63, E14.69, E14.71, E14.72, E14.73, E14.8 |
| 27 | Lymphoma                                                | C81, C82, C83, C84, C85, C86, C88                                                                                                                                                                                                                                                                                                                                                                                                                                                                                                                                                                                                           |
| 28 | Leukemia                                                | C90, C91, C92, C93, C94, C95, C96                                                                                                                                                                                                                                                                                                                                                                                                                                                                                                                                                                                                           |
| 29 | Metastatic solid tumour                                 | C76, C77, C78, C79, C80                                                                                                                                                                                                                                                                                                                                                                                                                                                                                                                                                                                                                     |
| 30 | Hemiplegia                                              | G81, G82                                                                                                                                                                                                                                                                                                                                                                                                                                                                                                                                                                                                                                    |
| 31 | Acquired Immune Deficiency Syndrome (AIDS)              | B20, B21, B22, B23, B24                                                                                                                                                                                                                                                                                                                                                                                                                                                                                                                                                                                                                     |
| 32 | Any tumor/malignancy excluding lymphoma and/or leukemia | C00-C80, D00-D09                                                                                                                                                                                                                                                                                                                                                                                                                                                                                                                                                                                                                            |
| 33 | Primary pulmonary hypertension                          | I27.0                                                                                                                                                                                                                                                                                                                                                                                                                                                                                                                                                                                                                                       |
| 34 | Secondary pulmonary hypertension                        | I27.2                                                                                                                                                                                                                                                                                                                                                                                                                                                                                                                                                                                                                                       |
| 35 | Intravenous drug use (IVDU) history                     | F11, F11.0, F11.1, F11.2, F11.3, F11.4, F11.5, F11.6, F11.7, F11.8, F11.9, F15.0, F15.00, F15.01, F15.02, F15.09, F15.1, F15.10, F15.11, F15.12, F15.19, F15.2, F15.20, F15.21, F15.22, F15.29, F15.3, F15.30, F15.31, F15.32, F15.39, F15.4, F15.40, F15.41, F15.42, F15.49, F15.5, F15.50, F15.51, F15.52, F15.59, F15.6, F15.60, F15.61, F15.62, F15.69, F15.7, F15.70, F15.71, F15.72, F15.79, F15.8, F15.80, F15.81, F15.82, F15.89, F15.9, F15.90, F15.91, F15.92, F15.99, T40.0, T40.1, T40.2, T40.3, T40.4, T40.6, T43.61                                                                                                           |
| 36 | Rheumatic disease involving the tricuspid valve         | I07, I07.0, I07.1, I07.2, I07.8, I07.9, I08.1, I08.2, I08.3                                                                                                                                                                                                                                                                                                                                                                                                                                                                                                                                                                                 |

\* To calculate the Charlson Comorbidity Index (CCI) score, without age adjustment, for individual patient during a particular admission of interest, use the following morbidity item numbers with their corresponding ICD-10AM codes to derive the patient's CCI score:

- 1 score for each morbidity item – 3, 6, 7, 8, 13, 16, 17, 20, 22, 23
- 2 score for each morbidity item – 25, 26, 27, 28, 30, 32
- 3 score for morbidity item – 24
- 6 score for morbidity item – 29, 31

| No. | ACHI procedures                                                                        | ACHI procedural codes                                                                                                                                           |
|-----|----------------------------------------------------------------------------------------|-----------------------------------------------------------------------------------------------------------------------------------------------------------------|
| 1   | Coronary angiography (cardiac catheterization with or without angioplasty or stenting) | 38200-00, 38203-00, 38206-00, 38215-00, 38218-00, 38218-01, 38218-02, 38300-00, 38303-00, 38306-00, 38306-01, 38306-02                                          |
| 2   | Transoesophageal echocardiogram                                                        | 55118-00                                                                                                                                                        |
| 3   | CABG (Coronary artery bypass graft)                                                    | 38456-19, 38497-00, 38497-01, 38497-02, 38497-03, 38497-04, 38497-05, 38497-06, 38497-07, 38500-00, 38500-01, 38500-02, 38500-03, 38500-04, 38500-05, 38503-00, |

|    |                                                                                                                                                     |                                                                                                                                                                                                                                                                                                                                                                                                                          |
|----|-----------------------------------------------------------------------------------------------------------------------------------------------------|--------------------------------------------------------------------------------------------------------------------------------------------------------------------------------------------------------------------------------------------------------------------------------------------------------------------------------------------------------------------------------------------------------------------------|
|    |                                                                                                                                                     | 38503-01, 38503-02, 38503-03, 38503-04, 38503-05, 38637-00, 38653-08, 90201-00, 90201-01, 90201-02, 90201-03                                                                                                                                                                                                                                                                                                             |
| 4  | Lone tricuspid valve surgery<br>(Only single valve surgery in single admission)<br>(exclude percutaneous approach)                                  | 38456-11, 38456-17, 38475-01, 38477-01, 38480-02, 38481-02, 38488-04, 38488-05, 38489-03, 38653-06                                                                                                                                                                                                                                                                                                                       |
| 5  | Combined aortic, mitral, tricuspid and pulmonary valves surgery<br>(All four valves surgery in single admission)<br>(exclude percutaneous approach) | 38456-01, 38456-10, 38456-11, 38456-15, 38456-16, 38456-17, 38456-18, 38475-00, 38475-01, 38475-02, 38477-00, 38477-01, 38477-02, 38480-00, 38480-01, 38480-02, 38481-00, 38481-01, 38481-02, 38483-00, 38485-00, 38485-01, 38487-00, 38488-00, 38488-01, 38488-02, 38488-03, 38488-04, 38488-05, 38488-06, 38488-07, 38489-00, 38489-01, 38489-02, 38489-03, 38489-04, 38489-05, 38653-04, 38653-05, 38653-06, 38653-07 |
| 6  | Combined aortic, mitral and tricuspid valves only surgery<br>(All three valves surgery in single admission)<br>(exclude percutaneous approach)      | 38456-10, 38456-11, 38456-15, 38456-16, 38456-17, 38475-00, 38475-01, 38475-02, 38477-00, 38477-01, 38477-02, 38480-00, 38480-01, 38480-02, 38481-00, 38481-01, 38481-02, 38483-00, 38485-00, 38485-01, 38487-00, 38488-00, 38488-01, 38488-02, 38488-03, 38488-04, 38488-05, 38489-00, 38489-01, 38489-02, 38489-03, 38653-04, 38653-05, 38653-06                                                                       |
| 7  | Combined aortic, tricuspid and pulmonary valves only surgery<br>(All three valves surgery in single admission)<br>(exclude percutaneous approach)   | 38456-01, 38456-10, 38456-11, 38456-15, 38456-17, 38456-18, 38475-01, 38475-02, 38477-01, 38477-02, 38480-00, 38480-02, 38481-00, 38481-02, 38483-00, 38488-00, 38488-01, 38488-04, 38488-05, 38488-06, 38488-07, 38489-00, 38489-01, 38489-03, 38489-04, 38489-05, 38653-04, 38653-06, 38653-07                                                                                                                         |
| 8  | Combined mitral, tricuspid and pulmonary valves only surgery<br>(All three valves surgery in single admission)<br>(exclude percutaneous approach)   | 38456-01, 38456-11, 38456-16, 38456-17, 38456-18, 38475-00, 38475-01, 38477-00, 38477-01, 38480-01, 38480-02, 38481-01, 38481-02, 38485-00, 38485-01, 38487-00, 38488-02, 38488-03, 38488-04, 38488-05, 38488-06, 38488-07, 38489-02, 38489-03, 38489-04, 38489-05, 38653-05, 38653-06, 38653-07                                                                                                                         |
| 9  | Combined aortic and tricuspid valves only surgery<br>(All two valves surgery in single admission)<br>(exclude percutaneous approach)                | 38456-10, 38456-11, 38456-15, 38456-17, 38475-01, 38475-02, 38477-01, 38477-02, 38480-00, 38480-02, 38481-00, 38481-02, 38483-00, 38488-00, 38488-01, 38488-04, 38488-05, 38489-00, 38489-01, 38489-03, 38653-04, 38653-06                                                                                                                                                                                               |
| 10 | Combined mitral and tricuspid valves only surgery<br>(All two valves surgery in single admission)<br>(exclude percutaneous approach)                | 38456-11, 38456-16, 38456-17, 38475-00, 38475-01, 38477-00, 38477-01, 38480-01, 38480-02, 38481-01, 38481-02, 38485-00, 38485-01, 38487-00, 38488-02, 38488-03, 38488-04, 38488-05, 38488-06, 38489-02, 38489-03, 38653-05, 38653-06                                                                                                                                                                                     |



|    |                                                                                                                                         |                                                                                                                                                                          |
|----|-----------------------------------------------------------------------------------------------------------------------------------------|--------------------------------------------------------------------------------------------------------------------------------------------------------------------------|
| 11 | Combined tricuspid and pulmonary valves only surgery<br>(All two valves surgery in single admission)<br>(exclude percutaneous approach) | 38456-01, 38456-11, 38456-17, 38456-18, 38475-01, 38477-01, 38480-02, 38481-02, 38488-04, 38488-05, 38488-06, 38488-07, 38489-03, 38489-04, 38489-05, 38653-06, 38653-07 |
| 12 | Tricuspid valve surgery sub-category:<br>• Tricuspid valve open valvotomy                                                               | 38456-11                                                                                                                                                                 |
| 13 | Tricuspid valve surgery sub-category:<br>• Tricuspid valve repair                                                                       | 38480-02, 38481-02                                                                                                                                                       |
| 14 | Tricuspid valve surgery sub-category:<br>• Tricuspid valve annuloplasty                                                                 | 38475-01, 38477-01                                                                                                                                                       |
| 15 | Tricuspid valve surgery sub-category:<br>• Tricuspid valve replacement<br>(exclude percutaneous approach)                               | 38488-04, 38488-05, 38489-03                                                                                                                                             |
| 16 | Tricuspid valve surgery sub-category:<br>• Other intrathoracic procedures on tricuspid valve                                            | 38456-17, 38653-06                                                                                                                                                       |

**Supplementary Table 2. Univariable associations with all-cause mortality during study period**

| Univariable analysis                                              | Parameters                     | HR (95% CI)      | P value |
|-------------------------------------------------------------------|--------------------------------|------------------|---------|
| <b>All-cause death during study follow-up (4.82 ± 3.94 years)</b> | Age ≥59 years *                | 2.16 (1.60-2.89) | <0.001  |
|                                                                   | Male                           | 1.02 (0.78-1.34) | 0.87    |
|                                                                   | Referral source                | -                | 0.27    |
|                                                                   | Emergency Department           | 1.00 (reference) | -       |
|                                                                   | Physician-referred             | 0.70 (0.48-1.02) | 0.06    |
|                                                                   | External hospital-referred     | 0.84 (0.54-1.32) | 0.45    |
|                                                                   | Others                         | 1.33 (0.41-4.34) | 0.63    |
|                                                                   | Unknown                        | 0.52 (0.12-2.16) | 0.37    |
|                                                                   | Indication for valve surgery † | -                | -       |
|                                                                   | Endocarditis                   | 0.57 (0.33-0.96) | 0.03    |
|                                                                   | Rheumatic tricuspid valve      | 1.32 (0.98-1.77) | 0.07    |
|                                                                   | Types of TV surgery ‡          |                  |         |
|                                                                   | Annuloplasty                   | 0.92 (0.70-1.21) | 0.56    |
|                                                                   | Replacement                    | 1.35 (1.03-1.77) | 0.03    |
|                                                                   | Repair                         | 0.50 (0.32-0.79) | 0.003   |
|                                                                   | Open valvotomy                 | 0.39 (0.06-2.80) | 0.35    |
|                                                                   | Others                         | 0.57 (0.24-1.39) | 0.22    |
|                                                                   | Concomitant CABG §             | 1.63 (1.16-2.29) | 0.005   |
|                                                                   | Ischemic heart disease         | 1.55 (1.14-2.12) | 0.006   |
|                                                                   | Prior PCI / CABG               | 1.30 (0.77-2.20) | 0.33    |
|                                                                   | Congestive cardiac failure     | 1.94 (1.48-2.54) | <0.001  |
|                                                                   | Stroke                         | 2.79 (1.23-6.31) | 0.01    |
|                                                                   | Peripheral vascular disease    | 1.67 (0.95-2.93) | 0.07    |
|                                                                   | Prosthetic heart valve         | 1.11 (0.74-1.65) | 0.61    |
|                                                                   | Atrial fibrillation/flutter    | 1.28 (0.98-1.69) | 0.07    |
|                                                                   | Hypertension                   | 1.15 (0.86-1.55) | 0.35    |
|                                                                   | Hyperlipidaemia                | 1.29 (0.68-2.44) | 0.43    |
|                                                                   | Diabetes                       | 1.54 (1.08-2.19) | 0.02    |
|                                                                   | Current/ex-smoker              | 0.96 (0.73-1.28) | 0.80    |
|                                                                   | Primary PHT                    | 1.03 (0.43-2.51) | 0.94    |
|                                                                   | Secondary PHT                  | 2.05 (1.45-2.88) | <0.001  |
|                                                                   | Malignancy                     | 3.54 (1.81-6.91) | <0.001  |
|                                                                   | Chronic pulmonary disease      | 2.62 (1.64-4.18) | <0.001  |
|                                                                   | Neurodegenerative disease ¶    | 1.73 (0.43-6.97) | 0.44    |
|                                                                   | Chronic kidney disease         | 1.78 (1.24-2.57) | 0.002   |
|                                                                   | IVDU history                   | 0.64 (0.39-1.07) | 0.09    |
|                                                                   | CCI score – per 1-score #      | 1.25 (1.18-1.33) | <0.001  |
|                                                                   | CCI score ≥1                   | 2.39 (1.79-3.20) | <0.001  |
|                                                                   | Year of surgery                | -                | 0.87    |
|                                                                   | 2002-2005                      | 1.00 (reference) | -       |
|                                                                   | 2006-2009                      | 0.86 (0.56-1.31) | 0.48    |
| 2010-2013                                                         | 0.90 (0.59-1.38)               | 0.63             |         |
| 2014-2018                                                         | 0.82 (0.51-1.35)               | 0.44             |         |

1  
2  
3 Plus-minus value represents mean  $\pm$  standard deviation (SD).

4 **CABG, coronary artery bypass graft; CCI, Charlson comorbidity index; CI, confidence interval; HR,**  
5 **hazards ratio; IVDU, intravenous drug use; NA, not applicable due to small sample size; PCI,**  
6 **percutaneous coronary interventions; PHT, pulmonary hypertension; TV, tricuspid valve.**

7 \* Age was dichotomized based on mean age of study cohort.

8 † Indication for cardiac valve surgery was either for endocarditis or for non-endocarditis cardiac  
9 valvular pathology.

10 ‡ More than one type of TV surgery might be performed on a patient during the same admission.

11 § Concomitant CABG performed during same admission for cardiac valve surgery.

12 ¶ Neurodegenerative disease includes dementia, central nervous systemic atrophies, Parkinson's  
13 disease, basal ganglia degeneration, and/or nervous systemic degenerative diseases.

14 # Conditions included in the Charlson Comorbidity Index include myocardial infarction, congestive  
15 cardiac failure, peripheral vascular disease, stroke, dementia, chronic pulmonary disease, connective  
16 tissue disease, peptic ulcer disease, liver disease (mild vs. moderate to severe), diabetes (with or  
17 without organ damage), hemiplegia, moderate to severe renal disease, any tumour (within last 5  
18 years), lymphoma, leukemia, metastatic solid tumour and acquired immunodeficiency syndrome.

**Supplementary Table 3. Independent predictors for all-cause mortality during study period**

| Multivariable analysis *                                          | Parameters                     | aHR (95% CI)      | P value |
|-------------------------------------------------------------------|--------------------------------|-------------------|---------|
| <b>All-cause death during study follow-up (4.82 ± 3.94 years)</b> | Age ≥59 years (mean age)       | 1.76 (1.26-2.47)  | 0.001   |
|                                                                   | Male                           | 1.01 (0.76-1.34)  | 0.96    |
|                                                                   | Indication for valve surgery † |                   |         |
|                                                                   | Endocarditis                   | 1.00 (0.56-1.77)  | 0.99    |
|                                                                   | Types of TV surgery ‡          |                   |         |
|                                                                   | Replacement                    | 1.32 (0.98-1.79)  | 0.07    |
|                                                                   | Repair                         | 0.78 (0.047-1.28) | 0.33    |
|                                                                   | Concomitant CABG §             | 1.34 (0.86-2.08)  | 0.20    |
|                                                                   | Ischemic heart disease         | 1.14 (0.77-1.70)  | 0.51    |
|                                                                   | Congestive cardiac failure     | 1.78 (1.33-2.38)  | <0.001  |
|                                                                   | Stroke                         | 2.25 (0.96-5.26)  | 0.06    |
|                                                                   | Diabetes                       | 1.12 (0.77-1.65)  | 0.55    |
|                                                                   | Secondary PHT                  | 1.36 (0.95-1.95)  | 0.10    |
|                                                                   | Malignancy                     | 3.49 (1.73-7.07)  | <0.001  |
|                                                                   | Chronic pulmonary disease      | 2.21 (1.36-3.59)  | <0.001  |
| Chronic kidney disease                                            | 1.26 (0.85-1.87)               | 0.25              |         |

Plus-minus value represents mean ± standard deviation (SD).

CABG, coronary artery bypass graft; CI, confidence interval; aHR, adjusted hazards ratio; PCI, percutaneous coronary interventions; PHT, pulmonary hypertension; TV, tricuspid valve.

\* Multivariable Cox regression method was used to identify independent predictors of all-cause mortality. Only univariables with P<0.05 were included in the multivariable analysis (see Supplementary Table 2 for univariable analysis results).

† Indication for cardiac valve surgery was either for endocarditis or non-endocarditis cardiac valvular pathology

‡ More than one type of TV surgery might be performed on a patient during the same admission.

§ Concomitant CABG performed during same admission for cardiac valve surgery.

1  
2  
3  
4  
5  
6  
7  
8  
9  
10  
11  
12  
13  
14  
15  
16  
17  
18  
19  
20  
21  
22  
23  
24  
25  
26  
27  
28  
29  
30  
31  
32  
33  
34  
35  
36  
37  
38  
39  
40  
41  
42  
43  
44  
45  
46  
47  
48  
49  
50  
51  
52  
53  
54  
55  
56  
57  
58  
59  
60

### Supplementary Figure 1. Study flow chart.

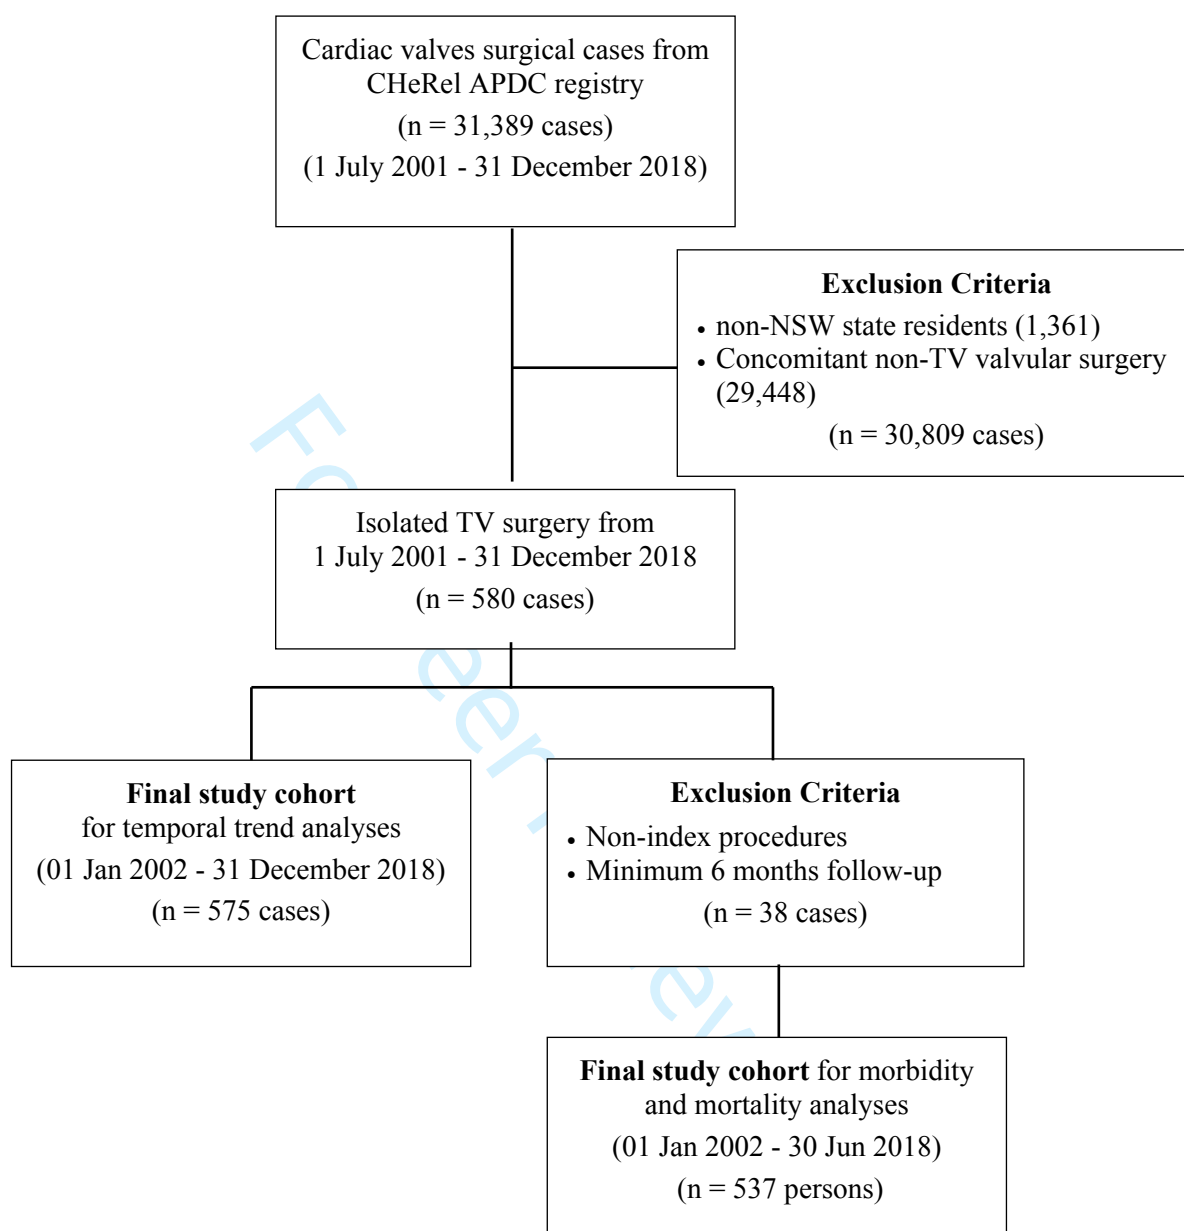

#### Legend

Flow chart shows the derivation of the study cohort.

APDC, Admitted Patient Data Collection; CHeReL, Centre for Health Record Linkage; NSW, New South Wales.

- \* Dataset containing all statewide admitted patients who underwent a broad range of cardiac procedures including coronary angiography, percutaneous coronary intervention, electrophysiology procedures and transesophageal echocardiography.

1  
2  
3  
4  
5  
6  
7  
8  
9  
10  
11  
12  
13  
14  
15  
16  
17  
18  
19  
20  
21  
22  
23  
24  
25  
26  
27  
28  
29  
30  
31  
32  
33  
34  
35  
36  
37  
38  
39  
40  
41  
42  
43  
44  
45  
46  
47  
48  
49  
50  
51  
52  
53  
54  
55  
56  
57  
58  
59  
60

**Supplementary Figure 2. Temporal trend of tricuspid valve annuloplasty during study period.**

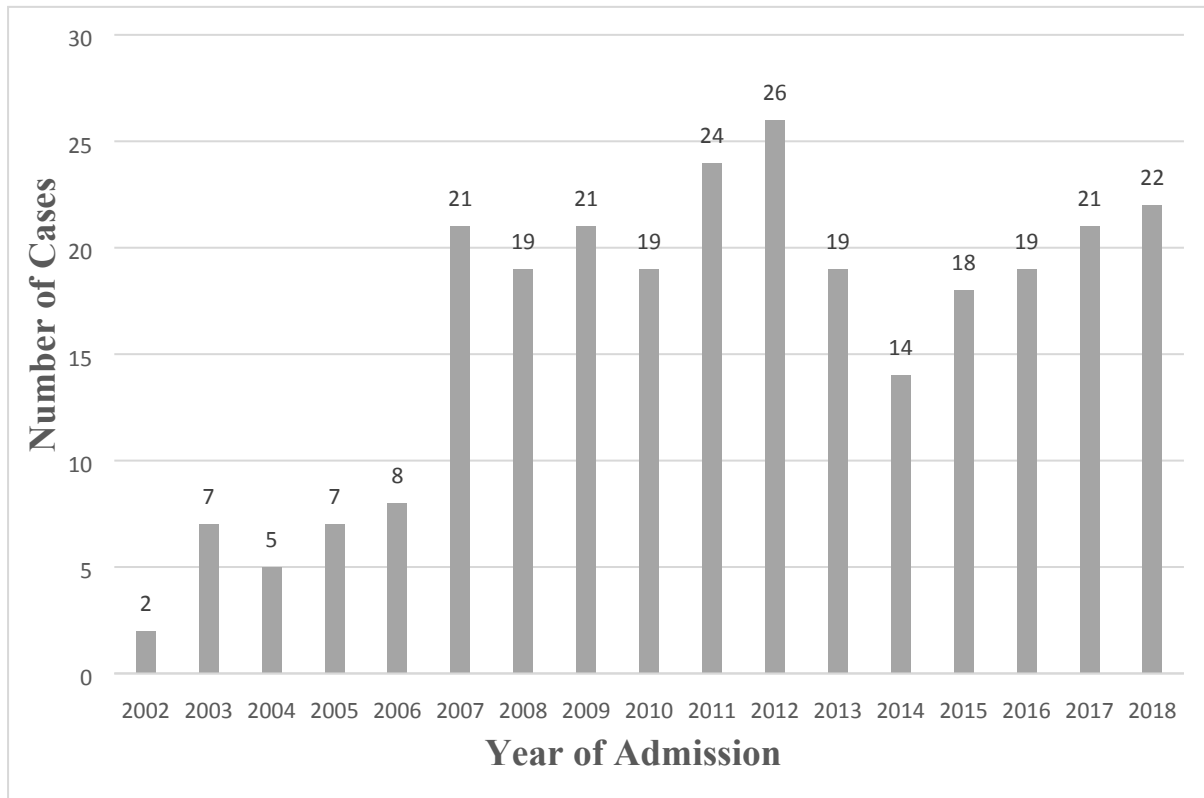

**Legend**

Figure shows temporal trend of tricuspid valve annuloplasty during study period (n=272), with a mean ( $\pm$ SD) of  $16.0 \pm 7.3$  cases per annum. Tricuspid valve annuloplasty caseload increased significantly over the course of the study period by an average of 0.46 cases per year (95% CI 0.21-0.72,  $p=0.002$ ).

1  
2  
3 **Supplementary Figure 3. Temporal trend of tricuspid valve replacement during study**  
4 **period.**  
5

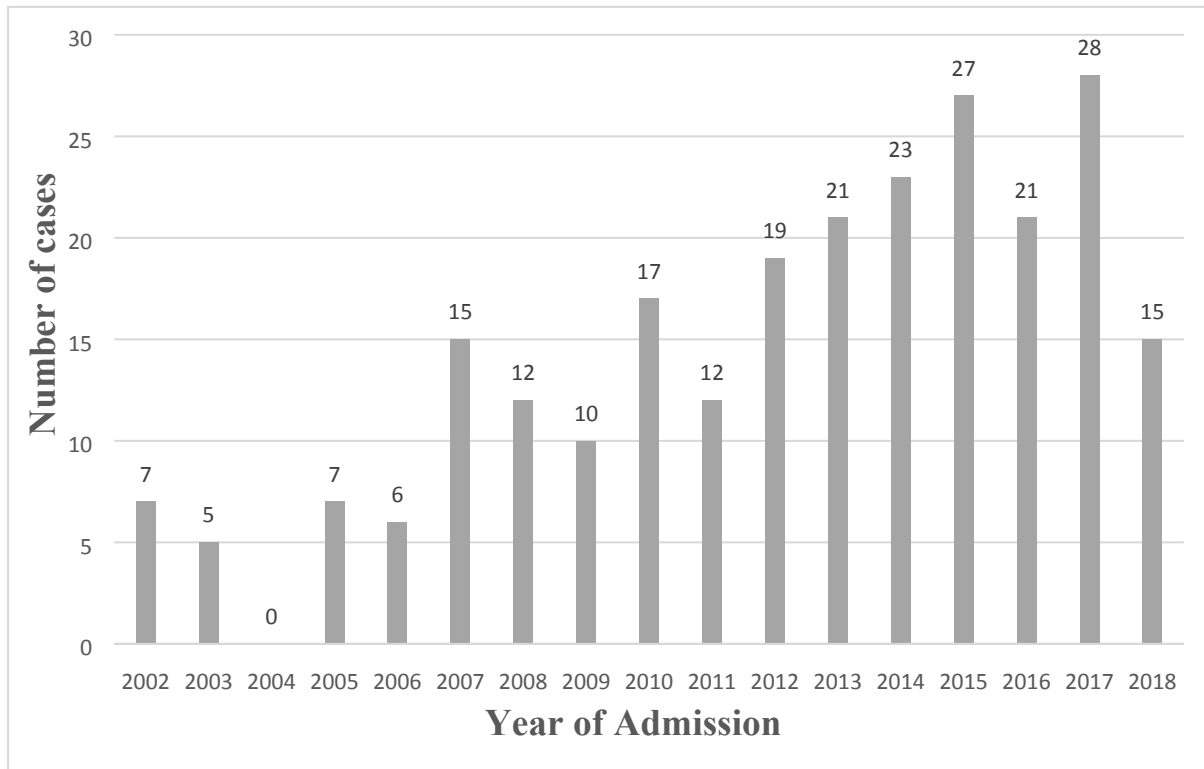

31 **Legend**

32 Figure shows temporal trend of tricuspid valve replacement during study period (n=245),  
33 with a mean ( $\pm$ SD) of  $14.4 \pm 8.1$  cases per annum. Tricuspid valve replacement caseload  
34 increased significantly over the study period by an average of 0.53 cases per year (95% CI  
35 0.40-0.65,  $p < 0.001$ ).  
36  
37  
38  
39  
40  
41  
42  
43  
44  
45  
46  
47  
48  
49  
50  
51  
52  
53  
54  
55  
56  
57  
58  
59  
60

1  
2  
3 **Supplementary Figure 4. Temporal trend of open tricuspid valvotomy during study**  
4 **period.**  
5

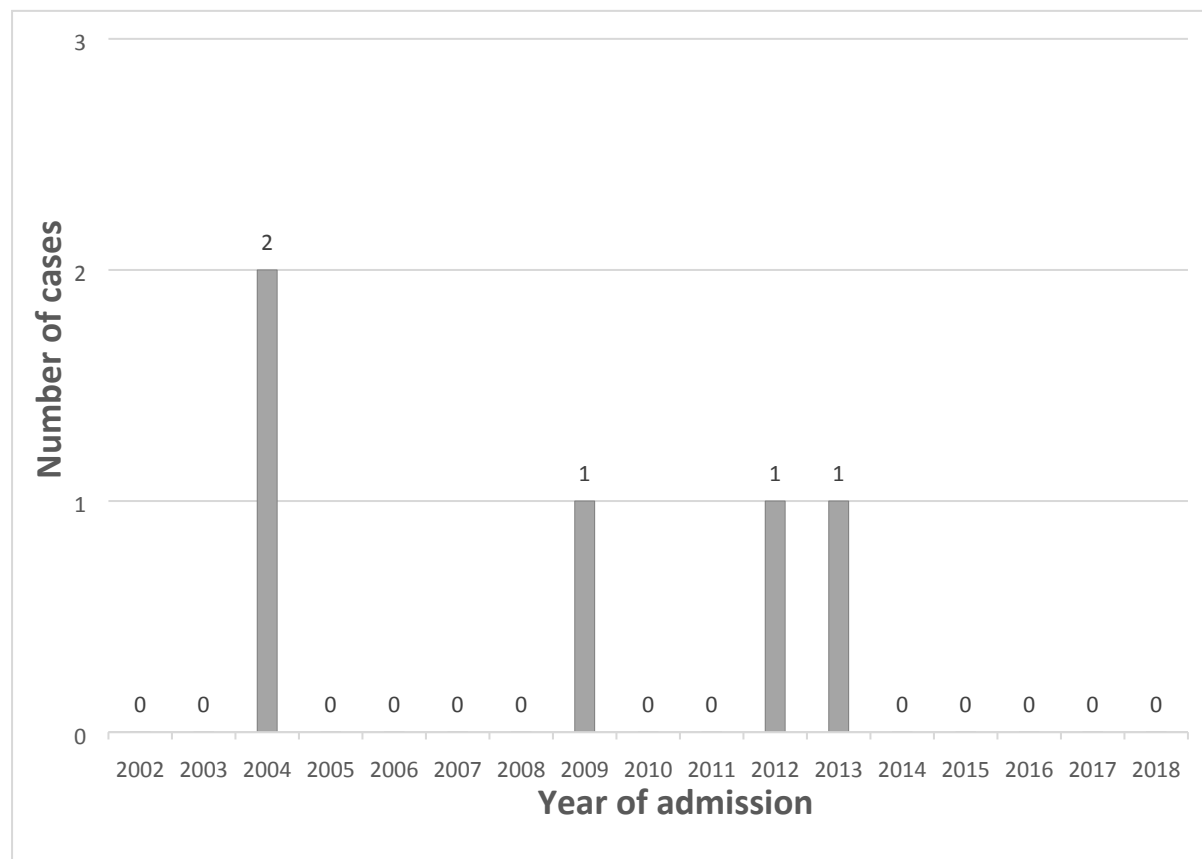

33  
34  
35 **Legend**

36 Figure shows temporal trend of open tricuspid valvotomy during study period (n=5), with a  
37 mean ( $\pm$ SD) of  $0.3 \pm 0.6$  cases per annum. There was no significant change in annual  
38 caseload valvotomies over the course of the study period ( $p=0.64$ ).  
39  
40  
41  
42  
43  
44  
45  
46  
47  
48  
49  
50  
51  
52  
53  
54  
55  
56  
57  
58  
59  
60



Supplementary Figure 5. Temporal trend of tricuspid valve repair during study period.

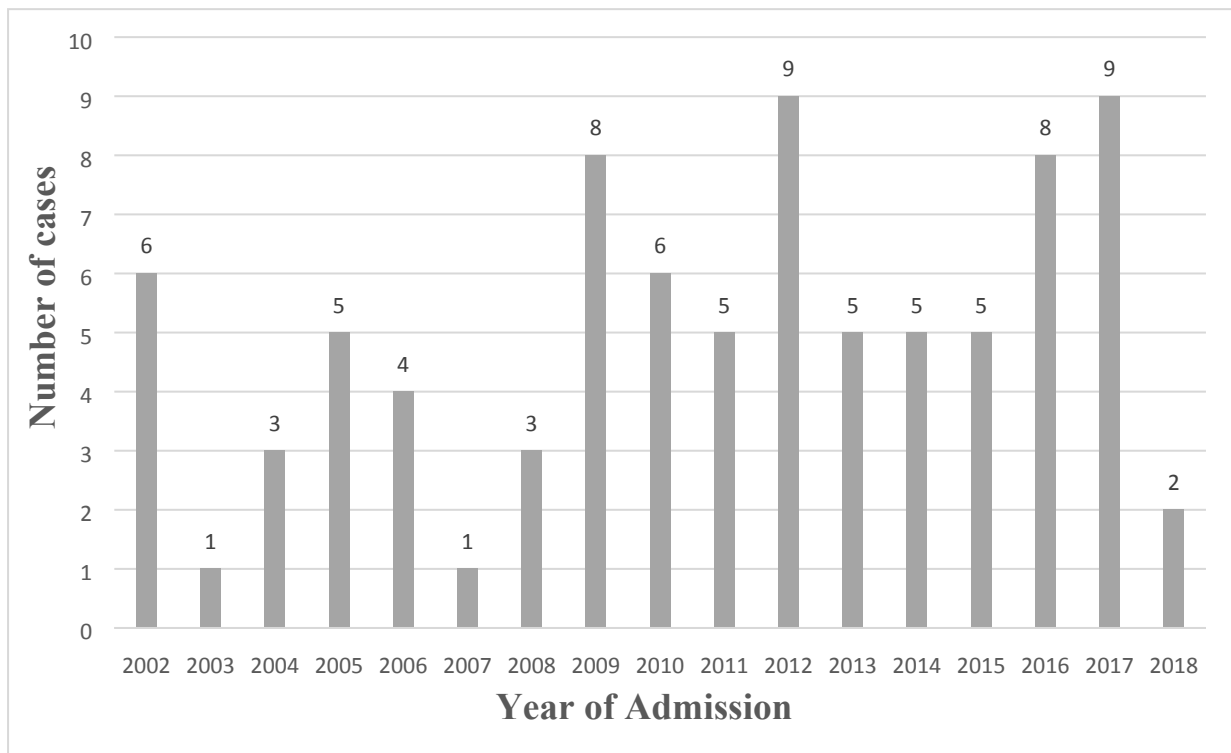

#### Legend

Figure shows temporal trend of tricuspid valve repair during study period (n=85), with a mean ( $\pm$ SD) of  $5.0 \pm 2.5$  cases per annum. Tricuspid valve repairs increased significantly over the study period by an average of 1.13 cases per year (95% CI 0.24-2.02,  $p=0.02$ ).

# Reporting checklist for cohort study.

Based on the STROBE cohort guidelines.

## Instructions to authors

Complete this checklist by entering the page numbers from your manuscript where readers will find each of the items listed below.

Your article may not currently address all the items on the checklist. Please modify your text to include the missing information. If you are certain that an item does not apply, please write "n/a" and provide a short explanation.

Upload your completed checklist as an extra file when you submit to a journal.

In your methods section, say that you used the STROBE cohort reporting guidelines, and cite them as:

von Elm E, Altman DG, Egger M, Pocock SJ, Gøtzsche PC, Vandenbroucke JP. The Strengthening of Reporting of Observational Studies in Epidemiology (STROBE) Statement: guidelines for reporting observational studies.

|                           |                                                                                                        |  | Page   |
|---------------------------|--------------------------------------------------------------------------------------------------------|--|--------|
|                           | Reporting Item                                                                                         |  | Number |
| <b>Title and abstract</b> |                                                                                                        |  |        |
| Title                     | <a href="#">#1a</a> Indicate the study's design with a commonly used term in the title or the abstract |  | 1      |

|    |                      |                     |                                                     |            |
|----|----------------------|---------------------|-----------------------------------------------------|------------|
| 1  | Abstract             | <a href="#">#1b</a> | Provide in the abstract an informative and          | 3-4        |
| 2  |                      |                     |                                                     |            |
| 3  |                      |                     |                                                     |            |
| 4  |                      |                     | balanced summary of what was done and what          |            |
| 5  |                      |                     |                                                     |            |
| 6  |                      |                     | was found                                           |            |
| 7  |                      |                     |                                                     |            |
| 8  |                      |                     |                                                     |            |
| 9  | <b>Introduction</b>  |                     |                                                     |            |
| 10 |                      |                     |                                                     |            |
| 11 |                      |                     |                                                     |            |
| 12 | Background /         | <a href="#">#2</a>  | Explain the scientific background and rationale for | 6-7        |
| 13 |                      |                     |                                                     |            |
| 14 | rationale            |                     | the investigation being reported                    |            |
| 15 |                      |                     |                                                     |            |
| 16 |                      |                     |                                                     |            |
| 17 | Objectives           | <a href="#">#3</a>  | State specific objectives, including any            | 7          |
| 18 |                      |                     |                                                     |            |
| 19 |                      |                     | prespecified hypotheses                             |            |
| 20 |                      |                     |                                                     |            |
| 21 |                      |                     |                                                     |            |
| 22 |                      |                     |                                                     |            |
| 23 | <b>Methods</b>       |                     |                                                     |            |
| 24 |                      |                     |                                                     |            |
| 25 |                      |                     |                                                     |            |
| 26 | Study design         | <a href="#">#4</a>  | Present key elements of study design early in the   | 8          |
| 27 |                      |                     |                                                     |            |
| 28 |                      |                     | paper                                               |            |
| 29 |                      |                     |                                                     |            |
| 30 |                      |                     |                                                     |            |
| 31 | Setting              | <a href="#">#5</a>  | Describe the setting, locations, and relevant       | 8          |
| 32 |                      |                     |                                                     |            |
| 33 |                      |                     | dates, including periods of recruitment, exposure,  |            |
| 34 |                      |                     |                                                     |            |
| 35 |                      |                     | follow-up, and data collection                      |            |
| 36 |                      |                     |                                                     |            |
| 37 |                      |                     |                                                     |            |
| 38 |                      |                     |                                                     |            |
| 39 | Eligibility criteria | <a href="#">#6a</a> | Give the eligibility criteria, and the sources and  | 8          |
| 40 |                      |                     |                                                     |            |
| 41 |                      |                     | methods of selection of participants. Describe      |            |
| 42 |                      |                     |                                                     |            |
| 43 |                      |                     | methods of follow-up.                               |            |
| 44 |                      |                     |                                                     |            |
| 45 |                      |                     |                                                     |            |
| 46 | Eligibility criteria | <a href="#">#6b</a> | For matched studies, give matching criteria and     | n/a (not a |
| 47 |                      |                     |                                                     | matched    |
| 48 |                      |                     | number of exposed and unexposed                     | study)     |
| 49 |                      |                     |                                                     |            |
| 50 |                      |                     |                                                     |            |
| 51 |                      |                     |                                                     |            |
| 52 |                      |                     |                                                     |            |
| 53 |                      |                     |                                                     |            |
| 54 | Variables            | <a href="#">#7</a>  | Clearly define all outcomes, exposures,             | 8-9        |
| 55 |                      |                     |                                                     |            |
| 56 |                      |                     | predictors, potential confounders, and effect       |            |
| 57 |                      |                     |                                                     |            |
| 58 |                      |                     |                                                     |            |
| 59 |                      |                     |                                                     |            |
| 60 |                      |                     |                                                     |            |

|    |                |                                                                        |       |
|----|----------------|------------------------------------------------------------------------|-------|
|    |                | modifiers. Give diagnostic criteria, if applicable                     |       |
| 1  |                |                                                                        |       |
| 2  |                |                                                                        |       |
| 3  |                |                                                                        |       |
| 4  | Data sources / | <a href="#">#8</a> For each variable of interest give sources of data  | 8-9   |
| 5  | measurement    | and details of methods of assessment                                   |       |
| 6  |                | (measurement). Describe comparability of                               |       |
| 7  |                | assessment methods if there is more than one                           |       |
| 8  |                | group. Give information separately for for                             |       |
| 9  |                | exposed and unexposed groups if applicable.                            |       |
| 10 |                |                                                                        |       |
| 11 |                |                                                                        |       |
| 12 |                |                                                                        |       |
| 13 |                |                                                                        |       |
| 14 |                |                                                                        |       |
| 15 |                |                                                                        |       |
| 16 |                |                                                                        |       |
| 17 |                |                                                                        |       |
| 18 | Bias           | <a href="#">#9</a> Describe any efforts to address potential sources   | 9-10  |
| 19 |                | of bias                                                                |       |
| 20 |                |                                                                        |       |
| 21 |                |                                                                        |       |
| 22 |                |                                                                        |       |
| 23 | Study size     | <a href="#">#10</a> Explain how the study size was arrived at          | 8     |
| 24 |                |                                                                        |       |
| 25 |                |                                                                        |       |
| 26 | Quantitative   | <a href="#">#11</a> Explain how quantitative variables were handled    | 11-12 |
| 27 | variables      | in the analyses. If applicable, describe which                         |       |
| 28 |                | groupings were chosen, and why                                         |       |
| 29 |                |                                                                        |       |
| 30 |                |                                                                        |       |
| 31 |                |                                                                        |       |
| 32 |                |                                                                        |       |
| 33 |                |                                                                        |       |
| 34 | Statistical    | <a href="#">#12a</a> Describe all statistical methods, including those |       |
| 35 | methods        | used to control for confounding                                        |       |
| 36 |                |                                                                        |       |
| 37 |                |                                                                        |       |
| 38 |                |                                                                        |       |
| 39 |                |                                                                        |       |
| 40 |                |                                                                        |       |
| 41 |                |                                                                        |       |
| 42 |                |                                                                        |       |
| 43 |                |                                                                        |       |
| 44 | Statistical    | <a href="#">#12b</a> Describe any methods used to examine              | 11-12 |
| 45 | methods        | subgroups and interactions                                             |       |
| 46 |                |                                                                        |       |
| 47 |                |                                                                        |       |
| 48 |                |                                                                        |       |
| 49 | Statistical    | <a href="#">#12c</a> Explain how missing data were addressed           | 8     |
| 50 | methods        |                                                                        |       |
| 51 |                |                                                                        |       |
| 52 |                |                                                                        |       |
| 53 |                |                                                                        |       |
| 54 | Statistical    | <a href="#">#12d</a> If applicable, explain how loss to follow-up was  | n/a   |
| 55 | methods        | addressed                                                              |       |
| 56 |                |                                                                        |       |
| 57 |                |                                                                        |       |
| 58 |                |                                                                        |       |
| 59 |                |                                                                        |       |
| 60 |                |                                                                        |       |

11-12

|    |                  |                      |                                                      |         |
|----|------------------|----------------------|------------------------------------------------------|---------|
| 1  | Statistical      | <a href="#">#12e</a> | Describe any sensitivity analyses                    | n/a     |
| 2  |                  |                      |                                                      |         |
| 3  | methods          |                      |                                                      |         |
| 4  |                  |                      |                                                      |         |
| 5  |                  |                      |                                                      |         |
| 6  |                  |                      |                                                      |         |
| 7  |                  |                      |                                                      |         |
| 8  |                  |                      |                                                      |         |
| 9  | <b>Results</b>   |                      |                                                      |         |
| 10 |                  |                      |                                                      |         |
| 11 |                  |                      |                                                      |         |
| 12 | Participants     | <a href="#">#13a</a> | Report numbers of individuals at each stage of       | 13      |
| 13 |                  |                      | study—eg numbers potentially eligible, examined      |         |
| 14 |                  |                      | for eligibility, confirmed eligible, included in the |         |
| 15 |                  |                      | study, completing follow-up, and analysed. Give      |         |
| 16 |                  |                      | information separately for for exposed and           |         |
| 17 |                  |                      | unexposed groups if applicable.                      |         |
| 18 |                  |                      |                                                      |         |
| 19 |                  |                      |                                                      |         |
| 20 |                  |                      |                                                      |         |
| 21 |                  |                      |                                                      |         |
| 22 |                  |                      |                                                      |         |
| 23 |                  |                      |                                                      |         |
| 24 |                  |                      |                                                      |         |
| 25 |                  |                      |                                                      |         |
| 26 |                  |                      |                                                      |         |
| 27 | Participants     | <a href="#">#13b</a> | Give reasons for non-participation at each stage     | 13      |
| 28 |                  |                      |                                                      |         |
| 29 |                  |                      |                                                      |         |
| 30 | Participants     | <a href="#">#13c</a> | Consider use of a flow diagram                       | 13      |
| 31 |                  |                      |                                                      |         |
| 32 |                  |                      |                                                      |         |
| 33 |                  |                      |                                                      | (Figure |
| 34 |                  |                      |                                                      | 1)      |
| 35 |                  |                      |                                                      |         |
| 36 |                  |                      |                                                      |         |
| 37 |                  |                      |                                                      |         |
| 38 |                  |                      |                                                      |         |
| 39 |                  |                      |                                                      |         |
| 40 |                  |                      |                                                      |         |
| 41 | Descriptive data | <a href="#">#14a</a> | Give characteristics of study participants (eg       | 13-15,  |
| 42 |                  |                      | demographic, clinical, social) and information on    | Table 1 |
| 43 |                  |                      | exposures and potential confounders. Give            |         |
| 44 |                  |                      | information separately for exposed and               |         |
| 45 |                  |                      | unexposed groups if applicable.                      |         |
| 46 |                  |                      |                                                      |         |
| 47 |                  |                      |                                                      |         |
| 48 |                  |                      |                                                      |         |
| 49 |                  |                      |                                                      |         |
| 50 |                  |                      |                                                      |         |
| 51 |                  |                      |                                                      |         |
| 52 |                  |                      |                                                      |         |
| 53 | Descriptive data | <a href="#">#14b</a> | Indicate number of participants with missing data    | n/a     |
| 54 |                  |                      | for each variable of interest                        |         |
| 55 |                  |                      |                                                      |         |
| 56 |                  |                      |                                                      |         |
| 57 |                  |                      |                                                      |         |
| 58 |                  |                      |                                                      |         |
| 59 |                  |                      |                                                      |         |
| 60 |                  |                      |                                                      |         |

|    |                  |                      |                                                   |
|----|------------------|----------------------|---------------------------------------------------|
| 1  |                  |                      |                                                   |
| 2  |                  |                      |                                                   |
| 3  |                  |                      |                                                   |
| 4  | Descriptive data | <a href="#">#14c</a> | Summarise follow-up time (eg, average and total   |
| 5  |                  |                      | amount)                                           |
| 6  |                  |                      |                                                   |
| 7  |                  |                      |                                                   |
| 8  |                  |                      |                                                   |
| 9  |                  |                      |                                                   |
| 10 |                  |                      |                                                   |
| 11 |                  |                      |                                                   |
| 12 |                  |                      |                                                   |
| 13 | Outcome data     | <a href="#">#15</a>  | Report numbers of outcome events or summary       |
| 14 |                  |                      | measures over time. Give information separately   |
| 15 |                  |                      | for exposed and unexposed groups if applicable.   |
| 16 |                  |                      |                                                   |
| 17 |                  |                      |                                                   |
| 18 |                  |                      |                                                   |
| 19 |                  |                      |                                                   |
| 20 |                  |                      |                                                   |
| 21 |                  |                      |                                                   |
| 22 |                  |                      |                                                   |
| 23 | Main results     | <a href="#">#16a</a> | Give unadjusted estimates and, if applicable,     |
| 24 |                  |                      | confounder-adjusted estimates and their precision |
| 25 |                  |                      | (eg, 95% confidence interval). Make clear which   |
| 26 |                  |                      | confounders were adjusted for and why they were   |
| 27 |                  |                      | included                                          |
| 28 |                  |                      |                                                   |
| 29 |                  |                      |                                                   |
| 30 |                  |                      |                                                   |
| 31 |                  |                      |                                                   |
| 32 |                  |                      |                                                   |
| 33 |                  |                      |                                                   |
| 34 |                  |                      |                                                   |
| 35 | Main results     | <a href="#">#16b</a> | Report category boundaries when continuous        |
| 36 |                  |                      | variables were categorized                        |
| 37 |                  |                      |                                                   |
| 38 |                  |                      |                                                   |
| 39 |                  |                      |                                                   |
| 40 |                  |                      |                                                   |
| 41 | Main results     | <a href="#">#16c</a> | If relevant, consider translating estimates of    |
| 42 |                  |                      | relative risk into absolute risk for a meaningful |
| 43 |                  |                      | time period                                       |
| 44 |                  |                      |                                                   |
| 45 |                  |                      |                                                   |
| 46 |                  |                      |                                                   |
| 47 |                  |                      |                                                   |
| 48 |                  |                      |                                                   |
| 49 |                  |                      |                                                   |
| 50 |                  |                      |                                                   |
| 51 |                  |                      |                                                   |
| 52 | Other analyses   | <a href="#">#17</a>  | Report other analyses done—eg analyses of         |
| 53 |                  |                      | subgroups and interactions, and sensitivity       |
| 54 |                  |                      | analyses                                          |
| 55 |                  |                      |                                                   |
| 56 |                  |                      |                                                   |
| 57 |                  |                      |                                                   |
| 58 |                  |                      |                                                   |
| 59 |                  |                      |                                                   |
| 60 |                  |                      |                                                   |

1 **Discussion**

2

3

4 **Key results** [#18](#) Summarise key results with reference to study 19  
 5 objectives  
 6  
 7

8  
 9  
 10 **Limitations** [#19](#) Discuss limitations of the study, taking into 23-24  
 11 account sources of potential bias or imprecision.  
 12  
 13 Discuss both direction and magnitude of any  
 14 potential bias.  
 15  
 16  
 17

18  
 19  
 20 **Interpretation** [#20](#) Give a cautious overall interpretation considering 19-23  
 21 objectives, limitations, multiplicity of analyses,  
 22 results from similar studies, and other relevant  
 23 evidence.  
 24  
 25  
 26  
 27

28  
 29  
 30 **Generalisability** [#21](#) Discuss the generalisability (external validity) of 22-23  
 31 the study results  
 32  
 33  
 34

35 **Other**

36  
 37 **Information**

38  
 39  
 40 **Funding** [#22](#) Give the source of funding and the role of the 1  
 41 funders for the present study and, if applicable,  
 42 for the original study on which the present article  
 43 is based  
 44  
 45  
 46  
 47  
 48  
 49  
 50  
 51

52 None The STROBE checklist is distributed under the terms of the Creative Commons Attribution  
 53 License CC-BY. This checklist can be completed online using <https://www.goodreports.org/>, a tool  
 54 made by the [EQUATOR Network](#) in collaboration with [Penelope.ai](#)  
 55  
 56  
 57  
 58  
 59  
 60

# BMJ Open

## Morbidity and Mortality Outcomes of Patients requiring Isolated Tricuspid Valve Surgery: a Retrospective Cohort Study of 537 patients in New South Wales between 2002 and 2018

|                                 |                                                                                                                                                                                                                                                                                                            |
|---------------------------------|------------------------------------------------------------------------------------------------------------------------------------------------------------------------------------------------------------------------------------------------------------------------------------------------------------|
| Journal:                        | <i>BMJ Open</i>                                                                                                                                                                                                                                                                                            |
| Manuscript ID                   | bmjopen-2023-080804.R1                                                                                                                                                                                                                                                                                     |
| Article Type:                   | Original research                                                                                                                                                                                                                                                                                          |
| Date Submitted by the Author:   | 06-Mar-2024                                                                                                                                                                                                                                                                                                |
| Complete List of Authors:       | Harvey, Gregory; Concord Hospital, Cardiology<br>Chow, Vincent; Concord Hospital, Cardiology<br>Rubenis, Imants; Concord Hospital, Cardiology<br>Brieger, David; Concord Hospital, Cardiology<br>Kritharides, Leonard; Concord Hospital, Cardiology<br>Ng, Austin Chin Chwan; Concord Hospital, Cardiology |
| <b>Primary Subject Heading</b>: | Cardiovascular medicine                                                                                                                                                                                                                                                                                    |
| Secondary Subject Heading:      | Cardiovascular medicine, Epidemiology                                                                                                                                                                                                                                                                      |
| Keywords:                       | Cardiothoracic surgery < SURGERY, CARDIOLOGY, Valvular heart disease < CARDIOLOGY                                                                                                                                                                                                                          |
|                                 |                                                                                                                                                                                                                                                                                                            |

SCHOLARONE™  
Manuscripts





I, the Submitting Author has the right to grant and does grant on behalf of all authors of the Work (as defined in the below author licence), an exclusive licence and/or a non-exclusive licence for contributions from authors who are: i) UK Crown employees; ii) where BMJ has agreed a CC-BY licence shall apply, and/or iii) in accordance with the terms applicable for US Federal Government officers or employees acting as part of their official duties; on a worldwide, perpetual, irrevocable, royalty-free basis to BMJ Publishing Group Ltd ("BMJ") its licensees and where the relevant Journal is co-owned by BMJ to the co-owners of the Journal, to publish the Work in this journal and any other BMJ products and to exploit all rights, as set out in our [licence](#).

The Submitting Author accepts and understands that any supply made under these terms is made by BMJ to the Submitting Author unless you are acting as an employee on behalf of your employer or a postgraduate student of an affiliated institution which is paying any applicable article publishing charge ("APC") for Open Access articles. Where the Submitting Author wishes to make the Work available on an Open Access basis (and intends to pay the relevant APC), the terms of reuse of such Open Access shall be governed by a Creative Commons licence – details of these licences and which [Creative Commons](#) licence will apply to this Work are set out in our licence referred to above.

Other than as permitted in any relevant BMJ Author's Self Archiving Policies, I confirm this Work has not been accepted for publication elsewhere, is not being considered for publication elsewhere and does not duplicate material already published. I confirm all authors consent to publication of this Work and authorise the granting of this licence.

1  
2  
3 **Morbidity and Mortality Outcomes of Patients requiring Isolated Tricuspid Valve**  
4 **Surgery: a Retrospective Cohort Study of 537 patients in New South Wales between**  
5 **2002 and 2018**  
6  
7  
8  
9

10  
11  
12 Harvey; Outcomes following Isolated Tricuspid Valve Surgery  
13

14  
15  
16  
17 Gregory Harvey (MD)<sup>a\*</sup>, Vincent Chow (MBBS, PhD)<sup>a</sup>, Imants Rubenis (MD)<sup>a</sup>, David  
18 Brieger (MBBS, PhD)<sup>a</sup>, Leonard Kritharides (MBBS, PhD)<sup>a</sup>, Austin Chin Chwan Ng  
19 (MBBS, BSc, MMed)<sup>a</sup>,  
20  
21

22  
23  
24 <sup>a</sup> Department of Cardiology, Concord Hospital, The University of Sydney, 1 Hospital  
25 Road, Concord 2139, NSW, Australia  
26  
27

28  
29  
30  
31 \* Contact information for corresponding author  
32

33 A/Prof Austin Chin Chwan Ng  
34

35 Cardiology Department, Concord Hospital, The University of Sydney  
36

37 1 Hospital Road, Concord NSW 2139 Australia  
38

39 Fax: (612) 9767 6994 Phone: (612) 9767 5000  
40

41 Email: [chin.ng@sydney.edu.au](mailto:chin.ng@sydney.edu.au)  
42  
43  
44  
45  
46

47 **Ethical approval:** The study protocol was approved by the New South Wales Population  
48 and Health Services Research Ethics Committee, reference number: 2013/09/479. The Ethics  
49 Committees granted a waiver of the usual requirement for the consent of the individual to the  
50  
51  
52  
53  
54  
55  
56  
57  
58  
59  
60

1  
2  
3 use of their health information. All patient data were de-identified and analysed  
4  
5 anonymously.  
6  
7  
8  
9

10 **Transparency:** The senior author affirms that the manuscript is an honest, accurate and  
11  
12 transparent account of the study being reported; that no important aspects of the study have  
13  
14 been omitted; and that any discrepancies from the study as planned (and, if relevant,  
15  
16 registered) have been explained.  
17  
18  
19  
20

21 **Word Count:** 3732 words  
22  
23  
24  
25  
26  
27  
28  
29  
30  
31  
32  
33  
34  
35  
36  
37  
38  
39  
40  
41  
42  
43  
44  
45  
46  
47  
48  
49  
50  
51  
52  
53  
54  
55  
56  
57  
58  
59  
60

## ABSTRACT

**Objectives:** The aim of the study was to evaluate mortality and morbidity outcomes following open-heart isolated tricuspid valve surgery (TVSx) with medium-long term follow up.

**Design:** Retrospective cohort study.

**Setting:** New South Wales (NSW) public and private hospital admissions between 1-Jan-2002 and 30-Jun-2018

**Participants:** A total of 537 patients underwent open isolated-TVX during the study period.

**Primary and Secondary outcome measures:** Primary outcome was all-cause mortality tracked from the death registry to 31-Dec-2018. Secondary morbidity outcomes including admission for congestive cardiac failure (CCF), new atrial fibrillation (AF), infective endocarditis (IE), pulmonary embolism (PE), and insertion of a permanent pacemaker (PPM) or implantable-cardioverter-defibrillator (ICD), were tracked from the Admitted Patient Data Collection (APDC) data base. Independent mortality associations were determined using the Cox regression method.

**Results:** A total of 537 patients underwent open isolated-TVX (46% male): median age (interquartile-range) was 63.5yo (43.9-73.8yo) with median length-of-stay 16days (10-31days). Main cardiovascular comorbidities were AF (54%) and CCF (42%); 67% had rheumatic TV. In-hospital and total mortality were 7.4% and 39.3% respectively (mean follow-up: 4.8yrs). Cause-specific deaths were evenly split between cardiovascular and noncardiovascular causes. Predictors of mortality included a history of congestive cardiac failure (hazard ratio [HR]=1.78, 95% confidence interval [CI]=1.33-2.38, p<0.001) and chronic pulmonary disease (HR=2.66, 95%CI=1.63-4.33, p<0.001). In-hospital PPM rate

1  
2  
3 was 10.0%. At 180days, 53 (9.9%) patients were admitted for CCF, 25 (10.1%) had new AF,  
4  
5 7 (1.5%) had new IE, and <1% had PE, post-discharge PPM or ICD insertion.  
6  
7

8 **Conclusion:** Open isolated-TVSx carries significant mortality risk, with decompensated CCF  
9  
10 and new AF the most common morbidities encountered post-surgery. This report forms a  
11  
12 benchmark to compare outcomes with newer percutaneous tricuspid interventions.  
13  
14

15  
16  
17 **Key Words:** Outcomes, tricuspid valve surgery, isolated cardiac valve surgery  
18  
19  
20  
21  
22  
23  
24  
25  
26  
27  
28  
29  
30  
31  
32  
33  
34  
35  
36  
37  
38  
39  
40  
41  
42  
43  
44  
45  
46  
47  
48  
49  
50  
51  
52  
53  
54  
55  
56  
57  
58  
59  
60

## STRENGTHS AND LIMITATIONS OF THIS STUDY

- A relatively large cohort of patients for an infrequently performed set of procedures.
- Study cohort was derived from a statewide unselected population from all public and private healthcare facilities that performed cardiothoracic surgery
- The use of a death registry with cause-specific data analysis adds detail to all-cause mortality figures.
- Comprises a heterogeneous group of procedures: TVSx annuloplasty, repair, replacement.
- Dataset lacks granular details such as echocardiographic data (e.g., RV size and function) or aetiology of TV dysfunction

## INTRODUCTION

The burden of tricuspid valve (TV) disease is expected to increase with the increasing age of the Australian population. The prevalence of moderate or severe TV regurgitation of any cause in developed countries is 4.0% in those over the age of 75, and 1.1% in those 65-74 (1). The prevalence of tricuspid valve stenosis, rare in developed countries, is not known.

The presence of tricuspid regurgitation (TR) is an independent predictor of increased mortality, both by itself (isolated functional TR) and for secondary aetiologies including left-sided valvular disease, heart failure, arrhythmogenic right ventricular cardiomyopathy, and pulmonary arterial hypertension (2-10).

TV surgery (TVSx) is largely performed in combination with other cardiac procedures, most frequently left-sided valve surgery (11). Society guidelines have consistently recommended isolated TVSx for patients with severe primary TR as their sole valvular lesion (12, 13). More recently the 2020 American Heart Association (AHA) and 2021 European Society of Cardiology (ESC) Valvular Heart Disease guidelines have recommended TVSx for select patients with severe secondary TR regardless of the presence of an indication for concurrent left-sided valve surgery or a history of prior left-sided valve surgery (14, 15).

Isolated open-heart TVSx (open-TVsx) has traditionally been associated with high mortality rates. Reported in-hospital mortality rates have varied over time from 8.8-19.0% in small (n<500) older studies (16, 17), to 8.8-9.7% in larger studies (n=1364 in Alqahtani et al, and n=5005 in Zack et al) over the last twenty years (11, 18), to as low as 3.2% in a recent single-

1  
2  
3 centre study (n=95) involving carefully selected patients (19). However longer-term  
4 morbidity outcomes, including re-admission for heart failure, permanent pacemaker (PPM)  
5 requirement, pulmonary embolism (PE) or new-onset atrial fibrillation (AF), are not well-  
6 described. Moreover, while an association between TVSx and PE has not been described,  
7 worsening TR has been numerically (although not statistically) associated with pulmonary  
8 embolism, TR may result from chronic thromboembolic disease, and PE is a plausible  
9 complication of TVSx given the association between left-sided valvular intervention and  
10 stroke (20-22).  
11  
12  
13  
14  
15  
16  
17  
18  
19  
20  
21  
22  
23

24 The primary aim of this study was to determine the incidence and temporal trends of open-  
25 heart isolated-TVSx in an Australian statewide cohort and examine their mortality outcomes.  
26  
27

28 The secondary aim was to characterize morbidity events after isolated-TVSx.  
29  
30  
31  
32  
33  
34  
35  
36  
37  
38  
39  
40  
41  
42  
43  
44  
45  
46  
47  
48  
49  
50  
51  
52  
53  
54  
55  
56  
57  
58  
59  
60



## METHODS

### Study population

The Centre for Health Record Linkage (CHeReL), established in 2006, holds one of the largest data linkage systems in Australia containing high-quality linked health data of residents in the state of New South Wales (NSW) (23). From its Admission-Patient-Data-Collection (APDC) database, which includes  $\geq 97\%$  of all healthcare facilities in the state, we identified consecutive admissions that involved open-heart surgery (excluding percutaneous approach) for tricuspid valve pathology (see Supplementary Table 1 for relevant ACHI procedure codes) either as primary or secondary procedures coded under the Australian Classification of Health Interventions (ACHI) coding system between 1-July-2001 and 31-December-2018. Our research group has published detailed outcomes studies using data obtained from the APDC database (24-29).

### Data sources

Variables obtained from the APDC database for each hospital admission that involved TVSx include admission date, age, gender, country of birth, admission referral source, length of admission, and in-hospital mortality.

The primary and all secondary diagnoses (potentially up to 50 secondary diagnoses) associated with each admission were retrieved from the APDC database. Each diagnosis was coded in the APDC database according to the International Classification of Diseases, Tenth

1  
2  
3 Revision Australian Modification (ICD-10AM). For this study, we pre-specified the  
4  
5 indication for cardiac valve surgery during admission as either for endocarditis (as primary or  
6  
7 secondary diagnosis) or as non-endocarditis valve surgery, and if concomitant coronary  
8  
9 artery bypass graft (CABG) surgery was performed in the same admission (see  
10  
11 Supplementary Table 1 for relevant ICD-10AM and ACHI codes). In addition, whether  
12  
13 rheumatic tricuspid valve was documented during admission was recorded. Additional  
14  
15 comorbidities extracted for this study include ischemic heart disease, prior percutaneous  
16  
17 coronary interventions [PCI] and/or CABG surgery, CCF, stroke, peripheral vascular disease,  
18  
19 prosthetic heart valve, and AF), primary or secondary pulmonary hypertension, cardiac risk  
20  
21 factors (including hypertension, hyperlipidaemia, diabetes and current/ex-smoker),  
22  
23 malignancy, chronic pulmonary disease, neurodegenerative disease, chronic kidney disease  
24  
25 and history of intravenous drug use (IVDU). In addition, the overall comorbid status of each  
26  
27 patient was quantified using the Charlson comorbidity index (CCI) (30). A value of 0  
28  
29 indicates no comorbidity, while higher values represent an increasing burden of comorbid  
30  
31 illnesses. Conditions included in the CCI include age (1 point for every decade after 40),  
32  
33 myocardial infarction, congestive cardiac failure, peripheral vascular disease, stroke,  
34  
35 dementia, chronic pulmonary disease, connective tissue disease, peptic ulcer disease, liver  
36  
37 disease (mild vs. moderate to severe), diabetes (with or without organ damage), hemiplegia,  
38  
39 moderate to severe renal disease, any tumour (within last 5 years), lymphoma, leukemia,  
40  
41 metastatic solid tumour and acquired immunodeficiency syndrome.  
42  
43  
44  
45  
46  
47  
48  
49  
50  
51  
52  
53  
54  
55  
56  
57  
58  
59  
60

## Study outcomes

The primary outcome of the study was all-cause and cause-specific death rates, tracked from the statewide death registry also held by CHeReL. For mortality analysis, cases were limited to only NSW state residents to minimize incomplete tracking. The end-of-study date was set at 31-December-2018. All death certificates were reviewed to ascertain cause-specific death rates. Each death was coded independently by two reviewers (AN and VC) according to general principles set by the World Health Organization (31). Reviewers were blinded to patient's background comorbid illnesses during coding. Disparities were resolved by consensus. Cause-specific mortality were based on prior published classifications (26). In brief, cardiovascular cause was defined as death due to acute myocardial infarction, CCF, stroke, cardiac-related causes (when more than one cardiac cause of death was recorded), or PE. Noncardiovascular causes included death due to sepsis, malignancy, other noncardiovascular causes, or undefined. Patients with multiple potential causes of death on their death certificates were classified as "undefined" and labelled as noncardiovascular death for the purposes of the present study.

Secondary outcomes of the study were tracked from the APDC database using linkage method to determine morbidity events during follow-up post-surgery. These include first re-admission for CCF, development of new AF or infective endocarditis, PE, and the need for a PPM or implantable-cardioverter-defibrillator (ICD) implantation.

1  
2  
3 The study protocol conforms to the ethical guidelines of the 1975 Declaration of Helsinki.  
4  
5 Approval was granted by the NSW Population and Health Services Research Ethics  
6  
7 Committee, reference number: 2013/09/479. The Ethics Committees granted a waiver of the  
8  
9 usual requirement for the consent of the individual to the use of their health information. All  
10  
11 patient data were de-identified and analysed anonymously.  
12  
13  
14  
15  
16  
17  
18  
19  
20  
21  
22  
23  
24  
25  
26  
27  
28  
29  
30  
31  
32  
33  
34  
35  
36  
37  
38  
39  
40  
41  
42  
43  
44  
45  
46  
47  
48  
49  
50  
51  
52  
53  
54  
55  
56  
57  
58  
59  
60

For peer review only

## Statistical analysis

To determine the incidence and temporal trend on case-volumes of isolated open-TVSx statewide during the study period, all admissions between 1-January-2002 and 31-December-2018 were included. For the rest of the analyses, the study cohort was limited to NSW state residents and confined to the index admission between 1-January-2002 and 30-June-2018, enabling a minimum of six months follow-up. Thus, for those who had repeat TVSx during the study period (recurring patients), only their initial admission was included. End-of-study follow-up was prespecified at 31-December-2018.

All continuous variables are expressed as mean  $\pm$  standard deviation (SD), unless otherwise stated, and categorical data given in absolute numbers and percentages. Linear regression was used to determine trends in TVSx caseload per-annum over the study period, excluding 2018 to minimize ascertainment bias as the APDC database receives six-monthly updates. To identify predictors of mortality post open-TVSx, Cox proportional hazard regression method was used. Univariables considered include age (dichotomized by mean age), gender, admission referral source, year-groups of surgery (stratified into 2002-2005, 2006-2009, 2010-2013, 2014-2018), indication for surgery (infective endocarditis), rheumatic tricuspid valve status, types of open-TVSx, concomitant CABG, other cardiovascular and noncardiovascular comorbidities. Univariables with  $p < 0.05$  were included in the multivariable Cox regression analysis, except for age and gender which were included irrespective of significance. The proportional hazards assumption was checked with log-minus-log plots.

1  
2  
3  
4  
5 All analyses were performed using SPSS v25.0 (IBM, USA) and Stata 16.1. A two-tailed  
6 probability value  $<0.05$  was considered statistically significant. No sponsors had a role in  
7 study design, data collection, data analysis, data interpretation, or writing of the report. All  
8 authors had full access to all the data in the study, and the corresponding author had final  
9 responsibility for the decision to submit for publication.  
10  
11  
12  
13  
14  
15  
16  
17  
18

19 **Patient and Public involvement:** Patients and/or the public were involved in the design, or  
20 conduct, or reporting or dissemination plans of this research. Refer to the Methods section for  
21 further details.  
22  
23  
24  
25  
26  
27  
28  
29  
30  
31  
32  
33  
34  
35  
36  
37  
38  
39  
40  
41  
42  
43  
44  
45  
46  
47  
48  
49  
50  
51  
52  
53  
54  
55  
56  
57  
58  
59  
60

## RESULTS

### *Temporal trend of TV cases*

There were 575 cases of open isolated-TVSx in the calendar years of 2002 to 2018, averaging  $34 \pm 14$  cases per-annum (Supplementary Figure 1). There was a significant increase in case numbers by an average of 2.73 cases per-annum over the study period (95% CI 1.95-3.50,  $p < 0.001$ ) (Figure 1). The bulk of TVS cases were TV annuloplasty ( $n=272$ ) and replacement ( $n=245$ ), with case volume for both surgeries increasing during the study period (Supplementary Figures 2-3). A smaller number of non-annuloplasty TV repairs ( $n=85$ ) and valvotomies ( $n=5$ ) were performed. While there were significant increases in TV repair caseloads during the study period, TV valvotomy caseloads were so small as to preclude trend analysis (Supplementary Figures 4-5).

### *Baseline demographic and surgical characteristics of study cohort*

The study cohort's median age was 63.5yo (43.9-73.8yo) and was 46.4% male. (Table 1). A total of 14.3% of patients had concomitant CABG, and endocarditis was the indication for TVSx in 10.4% of patients. A rheumatic tricuspid valve was documented in 66.5% of patients.

**Table 1. Study cohort demographic and surgical characteristics.**

| Parameters                               | Isolated TVSx (N=537) |
|------------------------------------------|-----------------------|
| <b>Demographics</b>                      |                       |
| Age, years                               | 58.2 ± 20.1           |
| Median (IQR)                             | 63.5 (43.9 – 73.8)    |
| Males                                    | 249 (46.4)            |
| Country of birth                         |                       |
| Australia plus territories / New Zealand | 379 (70.6)            |
| Europe                                   | 77 (14.3)             |
| Asia                                     | 33 (6.1)              |
| Other                                    | 48 (8.9%)             |
| <b>Co-morbidities</b>                    |                       |
| Cardiovascular disease *                 | 454 (84.5)            |
| Ischemic heart disease                   | 104 (19.4)            |
| Prior PCI / CABG                         | 31 (5.8)              |
| Congestive cardiac failure               | 200 (37.2)            |
| Stroke                                   | 11 (2.0)              |
| Peripheral vascular disease              | 25 (4.7)              |
| Prosthetic heart valve                   | 59 (11.0)             |
| Atrial fibrillation/flutter              | 289 (53.8)            |
| Cardiac risk factors *                   | 323 (60.1)            |
| Hypertension                             | 138 (25.7)            |
| Hyperlipidaemia                          | 16 (3.0)              |
| Diabetes                                 | 82 (15.3)             |
| Current/ex-smoker                        | 198 (36.9)            |
| Primary PHT                              | 11 (2.0)              |
| Secondary PHT                            | 74 (13.8)             |
| Malignancy                               | 10 (1.9)              |
| Chronic pulmonary disease                | 31 (5.8)              |
| Neurodegenerative disease *              | 3 (0.6)               |
| Chronic kidney disease                   | 73 (13.6)             |
| IVDU history                             | 54 (10.1)             |
| Charlson comorbidity index score †       | 1.4 ± 1.9             |
| Median (IQR)                             | 1 (0 - 2)             |
| <b>Surgical characteristics</b>          |                       |
| Indication for valve surgery             |                       |
| Endocarditis                             | 56 (10.4)             |
| Non-endocarditis                         | 481 (89.6)            |
| Rheumatic tricuspid valve                | 357 (66.5)            |
| Concomitant CABG ‡                       | 77 (14.3)             |
| Types of TVSx §                          |                       |
| Annuloplasty                             | 262 (48.8)            |
| Replacement                              | 217 (40.4)            |
| Repair                                   | 83 (15.5)             |
| Open valvotomy                           | 5 (0.9)               |



|                               |              |
|-------------------------------|--------------|
| Others                        | 15 (2.8)     |
| Length of hospital stay, days | 24.4 ± 23.5  |
| Median (IQR)                  | 16 (10 – 31) |

Plus-minus values represent mean ± standard deviation; all others represent numbers of patients with values in brackets representing percentages, or otherwise stated.

CABG, coronary artery bypass graft; IVDU, intravenous drug use; PCI, percutaneous coronary interventions; PHT, pulmonary hypertension; TVSx, tricuspid valve surgery.

\* Cardiovascular disease includes history of ischemic heart disease (include PCI and/or CABG), stroke, congestive cardiac failure, peripheral vascular disease, prosthetic heart valve and/or atrial fibrillation/flutter. Cardiac risk factors include history of hypertension, hyperlipidaemia, diabetes and/or smoking (current/previous). Neurodegenerative disease includes dementia, central nervous systemic atrophies, Parkinson's disease, basal ganglia degeneration, and/or nervous systemic degenerative diseases.

† Conditions included in the Charlson comorbidity index include myocardial infarction, congestive cardiac failure, peripheral vascular disease, stroke, dementia, chronic pulmonary disease, connective tissue disease, peptic ulcer disease, liver disease (mild vs. moderate to severe), diabetes (with or without organ damage), hemiplegia, moderate to severe renal disease, any tumour (within last 5 years), lymphoma, leukemia, metastatic solid tumour and acquired immunodeficiency syndrome.

‡ Concomitant CABG performed during same admission for cardiac valve surgery.

§ More than one type of TV surgery might be performed on a patient during the same admission.

AF was the most common cardiovascular comorbidity (58.3%), followed by CCF (37.2%) and ischemic heart disease (19.4%). A history of smoking (36.9%), hypertension (25.7%), and diabetes (15.3%) was common. Of the noncardiovascular comorbidities, secondary pulmonary hypertension (13.8%) and chronic kidney disease (13.6%) were the most common. Concomitant malignancy was rare, comprising 1.9% of the cohort. 10.1% had a documented history of IVDU. The median Charlson comorbidity index was 1 (interquartile range [IQR] 0-2). The median length of stay was 16 days (IQR 10-31 days). Rheumatic TV disease was common in our cohort, representing 66.5% of our cohort.

#### *All-cause and cause-specific mortality*

A total of 211 (39.3%) patients died during a mean follow-up of  $4.82 \pm 3.94$  years (Table 2).

In-hospital mortality rate was 7.4%, with 62 (11.5%) patients dying within 180-days post

open isolated-TVSx. A cardiovascular cause of death occurred in 45% of in-hospital deaths, and in 52% of post-discharge deaths (Table 3). Of the cardiovascular causes of death, heart failure was the most frequent cause, representing 10.0% (n=4) of in-hospital deaths and 25.2% (n=43) of post-discharge deaths. Sepsis was the most identified noncardiovascular cause of death, documented in 7 (17.5%) in-hospital deaths and 37 (21.6%) post-discharge deaths.

**Table 2. Morbidity and mortality outcomes following isolated TVSx.**

| <b>Cumulative incidence, no. (%)</b>   | <b>30-days</b>  | <b>180-days</b>  | <b>2-years</b>    | <b>End-of-study†</b> |
|----------------------------------------|-----------------|------------------|-------------------|----------------------|
| Congestive cardiac failure             | 11 (2.0)        | 53 (9.9)         | 109 (20.2)        | 157 (29.2)           |
| Atrial fibrillation *                  | 10 (4.0)        | 25 (10.1)        | 40 (16.1)         | 68 (27.4)            |
| Infective endocarditis *               | 4 (0.9)         | 7 (1.5)          | 10 (2.1)          | 26 (5.6)             |
| Pulmonary embolism                     | 1 (0.2)         | 2 (0.4)          | 5 (0.9)           | 7 (1.3)              |
| Permanent pacemaker                    | 2 (0.4)         | 3 (0.6)          | 20 (3.7)          | 40 (7.5)             |
| Implantable cardioverter defibrillator | 1 (0.2)         | 3 (0.6)          | 4 (0.8)           | 13 (2.4)             |
| <b>All-cause death</b>                 | <b>18 (3.4)</b> | <b>62 (11.5)</b> | <b>108 (20.1)</b> | <b>211 (39.3)</b>    |

\* Atrial fibrillation (AF) and infective endocarditis (IE) incidences were based on patients without baseline AF (n=248) or IE (n=466) during isolated tricuspid valve surgery (TVSx) admission.

† End-of-study was 31-December-2018.

**Table 3. Cause-specific death outcomes.**

| <b>Categories</b>               | <b>In-hospital (N=40)</b> | <b>Post-discharge (N=171)</b> |
|---------------------------------|---------------------------|-------------------------------|
|                                 | <b>No. (%) *</b>          | <b>No. (%) *</b>              |
| <b>Cardiovascular causes</b>    | <b>18 (45.0)</b>          | <b>89 (52.0)</b>              |
| Acute myocardial infarction     | 0 (0)                     | 6 (3.5)                       |
| Heart failure                   | 7 (17.5)                  | 43 (25.2)                     |
| Stroke                          | 4 (10.0)                  | 15 (8.8)                      |
| Pulmonary embolism              | 0 (0)                     | 2 (1.17)                      |
| Cardiac-related †               | 7 (17.5)                  | 23 (13.5)                     |
| <b>Noncardiovascular causes</b> | <b>22 (55.0)</b>          | <b>82 (48.0)</b>              |
| Sepsis                          | 7 (17.5)                  | 37 (21.6)                     |
| Malignancy                      | 1 (2.5)                   | 15 (8.8)                      |
| Other                           | 7 (17.5)                  | 17 (10.0)                     |
| Undefined                       | 7 (17.5)                  | 13 (7.6)                      |

\* No. (%) represents total number of deaths from each specific cause and value in brackets represents the percentage out of total deaths.

† Cardiac-related cause of death is coded when more than one cardiac cause of death is recorded on the death certificate.

### *Morbidity outcomes*

Table 2 shows the cumulative incidence of the study's pre-specified morbidity events after isolated-TVSx. The development of new AF (in those without a prior history of AF at index isolated-TVSx) and admissions for CCF were the most frequent morbidities documented during follow-up: the cumulative incidence of AF at 180-days and by end-of-study were 10.1% and 27.4% of patients respectively, while 53 (9.9%) patients had an admission for CCF within the first 180-days following isolated-TVSx, reaching 29.2% by end-of-study follow-up. Across the study period the rate of PE admission was low at 1.3%. 10.0% of patients had PPM implanted during their index isolated-TVSx admission. A further 40 (7.5%) and 13 (2.4%) patients required PPM and ICD implantations by end-of-study follow-up respectively.

### *Independent predictors for all-cause mortality*

Independent predictors for all-cause mortality following open isolated-TVSx were age  $\geq 59$  years, a background history of CCF, chronic pulmonary disease, and malignancy (Table 4). Malignancy was the strongest predictor of mortality (adjusted hazard ratio [aHR]=3.49, 95% confidence interval [CI]=1.73-7.07;  $p < 0.001$ ), followed by a history of chronic pulmonary disease (aHR=2.21, 95%CI=1.36-3.59;  $p < 0.001$ ). Neither gender, indication for surgery, rheumatic TV status, , concomitant CABG, history of ischemic heart disease, stroke, diabetes, pulmonary hypertension, chronic kidney disease, smoking status or history of IVDU were associated with the primary outcome (Supplementary Tables 2 and 3). While

univariate analysis showed TV replacement was associated with increased mortality (HR=1.35, 95%CI =1.03-1.77; p=0.03) and TV repair was associated with reduced mortality (HR=0.50, 95%CI =0.32-0.79; p =0.003), type of TV surgery was not associated with the primary outcome in multivariate analysis (Supplementary Tables 2 and 3).

**Table 4. Independent predictors for all-cause mortality.**

| Multivariable analysis *                                    | Parameters                 | aHR (95% CI)       | p value |
|-------------------------------------------------------------|----------------------------|--------------------|---------|
| <b>All-cause death during follow-up (4.82 ± 3.94 years)</b> | Age ≥59 years (mean age)   | 1.76 (1.26 – 2.47) | 0.001   |
|                                                             | Congestive cardiac failure | 1.78 (1.33 – 2.38) | <0.001  |
|                                                             | Chronic pulmonary disease  | 2.21 (1.36 – 3.59) | <0.001  |
|                                                             | Malignancy                 | 3.49 (1.73 – 7.07) | <0.001  |

Plus-minus value represents mean ± standard deviation.

CI, confidence interval; aHR, adjusted hazard ratio.

\* Multivariable Cox regression method was used to identify independent predictors for all-cause mortality. Only significant independent predictors are shown in the above table (see Supplementary Table 3 for complete multivariable analysis results).

## DISCUSSION

The present study examined the caseload and outcomes of open isolated-TVSx over a 17-year period in an unselected Australian statewide population. The main findings were: 1) open isolated-TVSx case volumes have increased significantly over the study period; 2) high post-operative mortality rates in the short and intermediate-term comparable to those in international studies; 3) heart failure and sepsis were the most common specific causes of death in both in-hospital and post-discharge follow-up; 4) new AF and admissions for CCF were the two most common morbidities encountered post-surgery; and, 5) age  $\geq 59$  years and history of CCF, chronic pulmonary disease and malignancy were associated with increased mortality risk.

### *TVSx caseloads*

Alqahtani et al demonstrated a significant increase in the caseload of both open isolated-TV repairs and replacements in the United States (US) between 2003 and 2014 using the Nationwide Inpatient Sample (NIS) (11). While the NIS captured about 20% of US admissions during this period, our study showed similarly increasing caseload findings in a statewide population where  $\geq 97\%$  of hospital admissions are captured, with the state of NSW approximating 32% of Australia's overall population. While the increase in caseload was significant, the procedure is still relatively rare as shown in our study, with open isolated-TVSx cases representing only 1.8% of total open-heart cardiac valve surgery. We postulate the increased caseload reflects the growth and ageing of the NSW population over this timeframe.

1  
2  
3  
4  
5  
6 *Prior studies mostly limited to in-hospital outcomes*  
7  
8  
9

10 Existing literature has been mostly limited to in-hospital outcomes after open isolated-TVSx.  
11  
12 There are two larger US-based studies examining in-hospital mortality and morbidity in  
13 addition to several smaller studies (11, 32). Our study showed an in-hospital mortality (7.4%)  
14 that is lower than the 8.8-9.7% reported in recent studies using similar administrative datasets  
15 (11, 18), but higher than the 3.4% rate reported in a recent single-centre study based on  
16 carefully selected patients (19). In-hospital PPM implantation rates (10.0%) in our study  
17 were also at the lower end of reported figures, which range from 9.5-24.4% (11, 19, 32).  
18  
19  
20  
21  
22  
23  
24  
25  
26  
27

28 *Cause-specific deaths following open isolated-TVSx*  
29  
30  
31  
32

33 This study is the first of its scale to examine cause-specific mortality after isolated TVSx.  
34  
35 The two leading causes of death both in-hospital and post-discharge were sepsis and CCF.  
36  
37 Fatal decompensated CCF may reflect unsuccessful attempted medical and/or surgical  
38 management of severe TV regurgitation with associated heart failure – indeed a history of  
39 CCF predicted a near 70% increased mortality risk in our multivariable analysis. On the other  
40 hand, the large proportion of deaths by sepsis are likely driven by the baseline comorbidities  
41 in our population. This is supported by our study's demonstration of strong independent  
42 associations between increased mortality and the presence of malignancy, older age and  
43 chronic pulmonary disease. While more conservative case selection may reduce mortality  
44  
45  
46  
47  
48  
49  
50  
51  
52  
53  
54  
55  
56  
57  
58  
59  
60

1  
2  
3 rates, the goal of surgery in these unwell patients may have been to improve quality of life (a  
4 parameter not directly measured in this administrative dataset) rather than longevity.  
5  
6  
7

8  
9  
10 *Morbidity following open isolated-TVSx*  
11

12  
13  
14 Morbidity after TVSx may provide a surrogate for quality of life, and providing data  
15 surrounding long-term morbidity forms an important aspect of informed consent prior to  
16 surgery. These data also form a benchmark against which to compare newer percutaneous  
17 interventions. In the present study, the main morbidities encountered post-discharge were re-  
18 admission for decompensated CCF (9.9%) and new AF (10.1%), although low rates of  
19 admissions for IE, PE, PPM and ICD insertions (all <1% except for IE at 1.5%) were also  
20 observed within the first 180-days. Two smaller studies have examined medium-long term  
21 morbidity outcomes following open isolated-TVSx. Dreyfus et al described a 38% incidence  
22 of heart failure hospitalisation at 5-years post-discharge in a French cohort of 466 patients  
23 who underwent isolated-TVSx (33). Wong et al described a much lower rate of 13.8% heart  
24 failure hospitalisation post-discharge during a mean follow-up of 4.9 years in a younger  
25 Taiwanese cohort (n=333) compared to 29.2% of patients in our study with a similar mean  
26 follow-up duration (34). While Dreyfus et al did not report on rates of post-discharge PPM  
27 insertion, Wong et al observed a 5.2% incidence of post-discharge PPM insertion by end-of-  
28 study, compared to 7.6% in our study. Notably, these and other studies have not reported on  
29 rates of PE, ICD insertion, or de novo infective endocarditis post-discharge. Reassuringly,  
30 these events appear to be low.  
31  
32  
33  
34  
35  
36  
37  
38  
39  
40  
41  
42  
43  
44  
45  
46  
47  
48  
49  
50  
51  
52  
53  
54  
55  
56  
57  
58  
59  
60

### *TVSx for Rheumatic TV*

Our cohort had a high proportion (66.5%) of patients with rheumatic TV disease. While increasingly uncommon in developed countries, rheumatic heart disease (RHD) remains prevalent in Indigenous Australians and immigrants from countries with endemic RHD (35). Organic TV involvement occurs in 4.9 – 9% of RHD, although autopsy studies have suggested much higher rates of involvement (36). Both repair and replacement are established surgical techniques for treating organic RHD TV disease, although several studies have reported higher mortality rates with tricuspid valve replacement compared with repair (36-38). While highly prevalent in our population, a rheumatic TV was not associated with increased mortality (Supplementary Table 2).

### *Pathomechanistic reasons for high mortality and morbidity associated with open-heart isolated-TV Sx*

There are two main hypotheses which attempt to explain why open isolated-TV Sx has consistently been associated with high in-hospital mortality and morbidity rates, despite not being considered technically more difficult than left sided-valvular surgery. The first is that patients are referred late for surgery, by which time the consequences of severe TR are, at best, partly remediable by surgery (e.g., right ventricular (RV) dilation and/or dysfunction, cardiac cirrhosis) (32, 33). Furthermore, patients with impaired RV size and/or function may not tolerate the increased afterload created by surgical correction of TR, and consequently further decompensate. Supporting this hypothesis, Hamandi et al (19) reported a dramatically lower in-hospital mortality of 3.2%, highlighting early referral as a defining feature of their



1  
2  
3 single-centre 95 patient cohort study. However, in-hospital mortality in their cohort was still  
4  
5 higher than that reported for left-sided valve surgery in the literature (11, 16-18). The second  
6  
7 hypothesis is that severe TR patients form a more comorbid cohort of patients, whose  
8  
9 comorbidities often exacerbate the severity of their TR. (e.g. pulmonary disease). Indeed, our  
10  
11 study showed chronic pulmonary disease to be associated with a 2.7-fold increased risk of  
12  
13 death post-surgery. Interestingly, while type of TV surgery was associated with mortality in  
14  
15 the univariate analysis, with replacement being higher risk than repair, this association did not  
16  
17 persist in multivariate analysis. One explanation may be that those with more advanced  
18  
19 disease are more likely to require replacement and not be appropriate candidates for repair.  
20  
21  
22  
23  
24  
25

#### 26 *Comparison with percutaneous tricuspid valve interventions*

27  
28  
29  
30

31 There is presently little published data on outcomes following isolated TV intervention, and  
32  
33 no long-term data. Published international registry data (n=312) has reported a 30-day all-  
34  
35 cause mortality rate of 3.6% following percutaneous TV intervention, varying depending on  
36  
37 the technique used from 2.8% with MitraClip to 7.6% with Cardioband (mean age 76.6yo)  
38  
39 (39). More recently, the TRILUMINATE trial (n=85), an international, prospective, single  
40  
41 arm study examining safety and efficacy of the TriClip edge-to-edge repair system, reported  
42  
43 a 1-year all-cause mortality rate of 7.1% (40). Mean ages for patients in both above trials  
44  
45 were greater than 75 years of age. While comparison between isolated-TVSx and  
46  
47 percutaneous interventions is currently limited by their different cohorts with respect to age,  
48  
49 comorbidities, and indication, our data forms an important benchmark against which to  
50  
51 compare emerging data on mid-long term outcomes following percutaneous TV intervention.  
52  
53  
54  
55  
56  
57  
58  
59  
60

### *Strengths and limitations*

This study's strengths lie in the large cohort of patients who underwent open isolated-TVSx, a relatively rare procedure compared to other cardiac valve surgery. In addition, our study cohort was derived from a statewide unselected population and included patients from all public and private healthcare facilities that performed cardiothoracic surgery, thus reflecting real-world clinical practice. Our long study period also allows for longitudinal trend analysis of medium to long-term outcomes including identifying important clinical predictors of mortality. The use of a death registry with cause-specific data analysis adds important detail to all-cause mortality figures.

However, this study is limited by its retrospective study design, which limits the imputation of causal links in our multivariable analysis. There was also no propensity-matched control group that did not undergo surgery against which to compare outcomes post TVSx.

Additionally, this is an observational study reflecting current practise on isolated TVSx which includes a heterogeneous group of procedures (e.g. annuloplasty, repair, replacement) with less clear evidence on the best approach compared to aortic or mitral valve procedures. Furthermore, while redo valvular surgery has been reported to be associated with poorer outcomes, we were unable to assess the impact of redo surgery on outcomes as our dataset only extends back to 2001 (41, 42). Also, our anonymised dataset does not allow for analysis of the association of operator experience with patient outcomes, a parameter that has been shown to be significant in other open valvular surgery (43, 44). While our study used the

1  
2  
3       Charlson Comorbidity Index (CCI) as a measure of comorbidity and operative risk, our  
4  
5       dataset does not have the necessary data to calculate values for more conventional  
6  
7       cardiothoracic risk pre-operative scores such as STS PROM or Euroscore II. Finally, our  
8  
9       administrative data lacks important granular details such as echocardiographic data (e.g. RV  
10  
11       size and function), functional class, medication usage, biochemical data or organ function  
12  
13       such as creatinine or liver function tests, exact aetiology of TV disease or its severity, or  
14  
15       indication for surgery (longevity vs quality of life). This speaks to the need for a national  
16  
17       registry of tricuspid valve surgeries with such granular detail, especially with the  
18  
19       development of newer TV interventions.  
20  
21  
22

## 23 24 25 26 **CONCLUSION**

27  
28  
29  
30  
31       Open isolated-TVSx carries a significant risk of post-operative mortality, with admission for  
32  
33       decompensated CCF and new AF the most common morbidities encountered post-surgery.  
34  
35       Independent predictors of mortality include age  $\geq 59$ yo and comorbidities including history of  
36  
37       cardiac failure, chronic pulmonary disease and malignancy. This study forms a benchmark  
38  
39       against which to compare outcomes with newer percutaneous TV interventions.  
40  
41  
42  
43  
44  
45  
46  
47  
48  
49  
50  
51  
52  
53  
54  
55  
56  
57  
58  
59  
60

1  
2  
3 **Acknowledgements:** Nil  
4  
5  
6  
7

8 **Author Contributions:** GH, VC, IR, DB, LK and AN were responsible for study concept  
9 and design; data collection, analysis, and interpretation; and manuscript preparation. GH and  
10 AN drafted the initial manuscript, and all authors contributed to data interpretation and  
11 critical revision of the report. All authors had full access to all the data (including statistical  
12 reports and tables) in the study and can take responsibility for the integrity of the data and the  
13 accuracy of the data analysis. AN is the guarantor.  
14  
15  
16  
17  
18  
19  
20  
21  
22  
23

24 **Funding:** This research received no specific grant from any funding agency in the public,  
25 commercial or not-for-profit sectors.  
26  
27  
28  
29  
30

31 **Competing interests:** All authors declare: no support from any organization for the  
32 submitted work; no financial relationships with any organizations that might have an interest  
33 in the submitted work in the previous three years; no other relationships or activities that  
34 could appear to have influenced the submitted work.  
35  
36  
37  
38  
39  
40  
41

42 **Data sharing:** No additional data available.  
43  
44  
45  
46  
47  
48  
49  
50  
51  
52  
53  
54  
55  
56  
57  
58  
59  
60

**REFERENCES**

1. Topilsky Y, Maltais S, Medina Inojosa J, Oguz D, Michelena H, Maalouf J, et al. Burden of tricuspid regurgitation in patients diagnosed in the community setting. *JACC: Cardiovascular Imaging*. 2019;12(3):433-42.
2. Nath J, Foster E, Heidenreich PA. Impact of tricuspid regurgitation on long-term survival. *Journal of the American College of Cardiology*. 2004;43(3):405-9.
3. Ruel M, Rubens FD, Masters RG, Pipe AL, Bédard P, Mesana TG. Late incidence and predictors of persistent or recurrent heart failure in patients with mitral prosthetic valves. *The Journal of thoracic and cardiovascular surgery*. 2004;128(2):278-83.
4. Hahn RT, Asch F, Weissman NJ, Grayburn P, Kar S, Lim S, et al. Impact of tricuspid regurgitation on clinical outcomes: the COAPT trial. *Journal of the American College of Cardiology*. 2020;76(11):1305-14.
5. Mehr M, Karam N, Taramasso M, Ouarrak T, Schneider S, Lurz P, et al. Combined tricuspid and mitral versus isolated mitral valve repair for severe MR and TR: an analysis from the TriValve and TRAMI registries. *Cardiovascular Interventions*. 2020;13(5):543-50.
6. McCarthy FH, Vemulapalli S, Li Z, Thourani V, Matsouaka RA, Desai ND, et al. Association of tricuspid regurgitation with transcatheter aortic valve replacement outcomes: a report from the Society of Thoracic Surgeons/American College of Cardiology Transcatheter Valve Therapy Registry. *The Annals of Thoracic Surgery*. 2018;105(4):1121-8.
7. Benfari G, Antoine C, Miller WL, Thapa P, Topilsky Y, Rossi A, et al. Excess mortality associated with functional tricuspid regurgitation complicating heart failure with reduced ejection fraction. *Circulation*. 2019;140(3):196-206.

- 1  
2  
3 8. Chen L, Larsen CM, Le RJ, Connolly HM, Pislaru SV, Murphy JG, et al. The  
4 prognostic significance of tricuspid valve regurgitation in pulmonary arterial hypertension.  
5  
6 The Clinical Respiratory Journal. 2018;12(4):1572-80.  
7
- 8  
9  
10 9. Pinamonti B, Dragos AM, Pyxaras SA, Merlo M, Pivetta A, Barbati G, et al.  
11  
12 Prognostic predictors in arrhythmogenic right ventricular cardiomyopathy: results from a 10-  
13  
14 year registry. European heart journal. 2011;32(9):1105-13.  
15
- 16  
17 10. Topilsky Y, Nkomo VT, Vatury O, Michelena HI, Letourneau T, Suri RM, et al.  
18  
19 Clinical outcome of isolated tricuspid regurgitation. JACC: Cardiovascular Imaging.  
20  
21 2014;7(12):1185-94.  
22
- 23  
24 11. Alqahtani F, Berzingi CO, Aljohani S, Hijazi M, Al-Hallak A, Alkhouli M.  
25  
26 Contemporary trends in the use and outcomes of surgical treatment of tricuspid regurgitation.  
27  
28 Journal of the American Heart Association. 2017;6(12):e007597.  
29
- 30  
31 12. Nishimura RA, Otto CM, Bonow RO, Carabello BA, Erwin JP, Guyton RA, et al.  
32  
33 2014 AHA/ACC guideline for the management of patients with valvular heart disease:  
34  
35 executive summary: a report of the American College of Cardiology/American Heart  
36  
37 Association Task Force on Practice Guidelines. Journal of the American College of  
38  
39 Cardiology. 2014;63(22):2438-88.  
40
- 41  
42 13. Falk V, Baumgartner H, Bax JJ, De Bonis M, Hamm C, Holm PJ, et al. 2017  
43  
44 ESC/EACTS Guidelines for the management of valvular heart disease. European Journal of  
45  
46 Cardio-Thoracic Surgery. 2017;52(4):616-64.  
47
- 48  
49 14. Otto CM, Nishimura RA, Bonow RO, Carabello BA, Erwin III JP, Gentile F, et al.  
50  
51 2020 ACC/AHA guideline for the management of patients with valvular heart disease:  
52  
53 executive summary: a report of the American College of Cardiology/American Heart  
54  
55

- 1  
2  
3 Association Joint Committee on Clinical Practice Guidelines. Journal of the American  
4 College of Cardiology. 2021;77(4):450-500.  
5  
6  
7  
8 15. Vahanian A, Beyersdorf F, Praz F, Milojevic M, Baldus S, Bauersachs J, et al. 2021  
9 ESC/EACTS Guidelines for the management of valvular heart disease: developed by the  
10 Task Force for the management of valvular heart disease of the European Society of  
11 Cardiology (ESC) and the European Association for Cardio-Thoracic Surgery (EACTS).  
12 European heart journal. 2022;43(7):561-632.  
13  
14  
15 16. Staab ME, Nishimura RA, Dearani JA. Isolated tricuspid valve surgery for severe  
16 tricuspid regurgitation following prior left heart valve surgery: analysis of outcome in 34  
17 patients. Journal of Heart Valve Disease. 1999;8(5):567-74.  
18  
19  
20 17. Do QB, Pellerin M, Carrier M, Cartier R, Hebert Y, Page P, et al. Clinical outcome  
21 after isolated tricuspid valve replacement: 20-year experience. The Canadian journal of  
22 cardiology. 2000;16(4):489-93.  
23  
24  
25 18. Zack CJ, Fender EA, Chandrashekar P, Reddy YN, Bennett CE, Stulak JM, et al.  
26 National trends and outcomes in isolated tricuspid valve surgery. Journal of the American  
27 College of Cardiology. 2017;70(24):2953-60.  
28  
29  
30 19. Hamandi M, Smith RL, Ryan WH, Grayburn PA, Vasudevan A, George TJ, et al.  
31 Outcomes of isolated tricuspid valve surgery have improved in the modern era. The Annals  
32 of thoracic surgery. 2019;108(1):11-5.  
33  
34  
35 20. Chorin E, Rozenbaum Z, Topilsky Y, Konigstein M, Ziv-Baran T, Richert E, et al.  
36 Tricuspid regurgitation and long-term clinical outcomes. European Heart Journal-  
37 Cardiovascular Imaging. 2020;21(2):157-65.  
38  
39  
40  
41  
42  
43  
44  
45  
46  
47  
48  
49  
50  
51  
52  
53  
54  
55  
56  
57  
58  
59  
60

- 1  
2  
3 21. Russo A, Grigioni F, Avierinos J-F, Freeman WK, Suri R, Michelena H, et al.  
4  
5 Thromboembolic complications after surgical correction of mitral regurgitation: incidence,  
6  
7 predictors, and clinical implications. *Journal of the American College of Cardiology*.  
8  
9 2008;51(12):1203-11.  
10  
11  
12 22. Thourani VH, Kodali S, Makkar RR, Herrmann HC, Williams M, Babaliaros V, et al.  
13  
14 Transcatheter aortic valve replacement versus surgical valve replacement in intermediate-risk  
15  
16 patients: a propensity score analysis. *The Lancet*. 2016;387(10034):2218-25.  
17  
18  
19 23. Centre for Health Record Linkage (CHeReL). Available at <http://www.cherel.org.au>.  
20  
21  
22 24. Lee A-H, Ng ACC, Yong ASC, Hyun K, Brieger D, Kritharides L, et al. Outcomes of  
23  
24 1,098 patients following transcatheter aortic valve implantation: a statewide population-  
25  
26 linkage cohort study. *Heart, Lung and Circulation*. 2021;30(8):1213-20.  
27  
28  
29 25. Cheng Y-Y, Brieger D, Bannon P, Chow V, Kritharides L, Ng ACC. Outcomes  
30  
31 Following Triple Cardiac Valve Surgery Over 17-years: A Multicentre Population-Linkage  
32  
33 Study. *Heart, Lung and Circulation*. 2022.  
34  
35  
36 26. Ng AC, Chung T, Yong AS, Wong HS, Chow V, Celermajer DS, et al. Long-term  
37  
38 cardiovascular and noncardiovascular mortality of 1023 patients with confirmed acute  
39  
40 pulmonary embolism. *Circ Cardiovasc Qual Outcomes*. 2011;4(1):122-8.  
41  
42  
43 27. Ng ACC, Lau JK, Chow V, Adikari D, Brieger D, Kritharides L. Outcomes of 4838  
44  
45 patients requiring temporary transvenous cardiac pacing: a statewide cohort study.  
46  
47 *International Journal of Cardiology*. 2018;271:98-104.  
48  
49  
50 28. Brieger DB, Ng AC, Chow V, D'Souza M, Hyun K, Bannon PG, et al. Falling  
51  
52 hospital and postdischarge mortality following CABG in New South Wales from 2000 to  
53  
54 2013. *Open Heart*. 2019;6(1):e000959.  
55  
56  
57  
58  
59  
60



- 1  
2  
3 29. Cheng Y-Y, Chow V, Brieger D, Yan TD, Kritharides L, Ng ACC. Outcomes of  
4 16,436 patients requiring isolated aortic valve surgery: A statewide cohort study.  
5  
6 International Journal of Cardiology. 2021;326:55-61.  
7  
8  
9  
10 30. Charlson ME, Pompei P, Ales KL, MacKenzie CR. A new method of classifying  
11 prognostic comorbidity in longitudinal studies: development and validation. J Chronic Dis.  
12 1987;40(5):373-83.  
13  
14  
15 31. National Center for Health Statistics. Instructions for Classifying the Underlying  
16 Cause-of-Death, ICD-10. 2008:1-259. <http://www.cdc.gov/nchs/about/major/dvs/im.htm>  
17 Accessed June 10, 2009.  
18  
19  
20  
21  
22  
23 32. Kawsara A, Alqahtani F, Nkomo VT, Eleid MF, Pislaru SV, Rihal CS, et al.  
24 Determinants of morbidity and mortality associated with isolated tricuspid valve surgery.  
25  
26 Journal of the American Heart Association. 2021;10(2):e018417.  
27  
28  
29  
30 33. Dreyfus J, Flagiello M, Bazire B, Eggenpieler F, Viau F, Riant E, et al. Isolated  
31 tricuspid valve surgery: impact of aetiology and clinical presentation on outcomes. European  
32  
33 Heart Journal. 2020;41(45):4304-17.  
34  
35  
36  
37 34. Wong WK, Chen SW, Chou AH, Lee HA, Cheng YT, Tsai FC, et al. Late outcomes  
38 of valve repair versus replacement in isolated and concomitant tricuspid valve surgery: a  
39  
40 nationwide cohort study. Journal of the American Heart Association. 2020;9(8):e015637.  
41  
42  
43  
44 35. Katzenellenbogen JM, Bond-Smith D, Seth RJ, Dempsey K, Cannon J, Stacey I, et al.  
45 Contemporary incidence and prevalence of rheumatic fever and rheumatic heart disease in  
46  
47 Australia using linked data: the case for policy change. Journal of the American Heart  
48  
49 Association. 2020;9(19):e016851.  
50  
51  
52  
53  
54  
55  
56  
57  
58  
59  
60

- 1  
2  
3 36. Sultan F, Moustafa SE, Tajik J, Warsame T, Emani U, Alharthi M, et al. Rheumatic  
4 tricuspid valve disease: an evidence-based systematic overview. *J Heart Valve Dis.*  
5  
6 2010;19(3):374-82.  
7  
8  
9  
10 37. Bernal JM, Pontón A, Diaz B, Llorca J, García I, Sarralde A, et al. Surgery for  
11  
12 rheumatic tricuspid valve disease: a 30-year experience. *The Journal of Thoracic and*  
13  
14 *Cardiovascular Surgery.* 2008;136(2):476-81.  
15  
16  
17 38. Moutakiallah Y, Aithoussa M, Atmani N, Seghrouchni A, Moujahid A, Hatim A, et  
18  
19 al. Reoperation for isolated rheumatic tricuspid regurgitation. *Journal of cardiothoracic*  
20  
21 *surgery.* 2018;13:1-10.  
22  
23  
24 39. Taramasso M, Alessandrini H, Latib A, Asami M, Attinger-Toller A, Biasco L, et al.  
25  
26 Outcomes after current transcatheter tricuspid valve intervention: mid-term results from the  
27  
28 international TriValve registry. *JACC: Cardiovascular Interventions.* 2019;12(2):155-65.  
29  
30  
31 40. Lurz P, Stephan von Bardeleben R, Weber M, Sitges M, Sorajja P, Hausleiter J, et al.  
32  
33 Transcatheter edge-to-edge repair for treatment of tricuspid regurgitation. *Journal of the*  
34  
35 *American College of Cardiology.* 2021;77(3):229-39.  
36  
37  
38 41. Fukunaga N, Okada Y, Konishi Y, Murashita T, Yuzaki M, Shomura Y, et al.  
39  
40 Clinical outcomes of redo valvular operations: a 20-year experience. *The Annals of thoracic*  
41  
42 *surgery.* 2012;94(6):2011-6.  
43  
44  
45 42. Fukunaga N, Sakata R, Koyama T. Short-and long-term outcomes following redo  
46  
47 valvular surgery. *Journal of Cardiac Surgery.* 2018;33(2):56-63.  
48  
49  
50 43. Bolling SF, Li S, O'Brien SM, Brennan JM, Prager RL, Gammie JS. Predictors of  
51  
52 mitral valve repair: clinical and surgeon factors. *The Annals of thoracic surgery.*  
53  
54 2010;90(6):1904-12.  
55  
56  
57  
58  
59  
60

1  
2  
3 44. Moon MR, Henn MC, Maniar HS, Pasque MK, Melby SJ, Kachroo P, et al. Impact of  
4 surgical experience on operative mortality after reoperative cardiac surgery. The Annals of  
5 Thoracic Surgery. 2020;110(6):1909-16.  
6  
7  
8  
9  
10  
11  
12  
13  
14  
15  
16  
17  
18  
19  
20  
21  
22  
23  
24  
25  
26  
27  
28  
29  
30  
31  
32  
33  
34  
35  
36  
37  
38  
39  
40  
41  
42  
43  
44  
45  
46  
47  
48  
49  
50  
51  
52  
53  
54  
55  
56  
57  
58  
59  
60

For peer review only

## Figure Legends

### *Figure 1.*

Figure shows temporal trend of annual volume of isolated tricuspid valve surgery during study period (n=575), with a mean ( $\pm$ SD) of  $34 \pm 14$  cases per-annum. Annual case volumes significantly increased over the study period with an average rise of 2.73 cases per year (95% CI 1.95-3.50,  $p < 0.001$ ).

### *Supplementary Figure 1.*

Flow chart shows the derivation of the study cohort.

APDC, Admitted Patient Data Collection; CHeReL, Centre for Health Record Linkage; NSW, New South Wales.

\* Dataset containing all statewide admitted patients who underwent a broad range of cardiac procedures including coronary angiography, percutaneous coronary intervention, electrophysiology procedures and transesophageal echocardiography.

### *Supplementary Figure 2*

Figure shows temporal trend of tricuspid valve annuloplasty during study period (n=272), with a mean ( $\pm$ SD) of  $16.0 \pm 7.3$  cases per annum. Tricuspid valve annuloplasty caseload increased significantly over the course of the study period by an average of 0.46 cases per year (95% CI 0.21-0.72,  $p = 0.002$ ).

### *Supplementary Figure 3*

Figure shows temporal trend of tricuspid valve replacement during study period (n=245), with a mean ( $\pm$ SD) of  $14.4 \pm 8.1$  cases per annum. Tricuspid valve replacement caseload increased significantly over the study period by an average of 0.53 cases per year (95% CI 0.40-0.65,  $p < 0.001$ ).

### *Supplementary Figure 4*

Figure shows temporal trend of open tricuspid valvotomy during study period (n=5), with a mean ( $\pm$ SD) of  $0.3 \pm 0.6$  cases per annum. There was no significant change in annual caseload valvotomies over the course of the study period ( $p = 0.64$ ).

1  
2  
3 *Supplementary Figure 5*  
4

5 Figure shows temporal trend of tricuspid valve repair during study period (n=85), with a  
6 mean ( $\pm$ SD) of  $5.0 \pm 2.5$  cases per annum. Tricuspid valve repairs increased significantly  
7 over the study period by an average of 1.13 cases per year (95% CI 0.24-2.02, p=0.02).  
8  
9  
10  
11  
12  
13  
14  
15  
16  
17  
18  
19  
20  
21  
22  
23  
24  
25  
26  
27  
28  
29  
30  
31  
32  
33  
34  
35  
36  
37  
38  
39  
40  
41  
42  
43  
44  
45  
46  
47  
48  
49  
50  
51  
52  
53  
54  
55  
56  
57  
58  
59  
60

For peer review only

**Figure 1. Temporal trend of annual isolated tricuspid valve surgical volume during study period.**

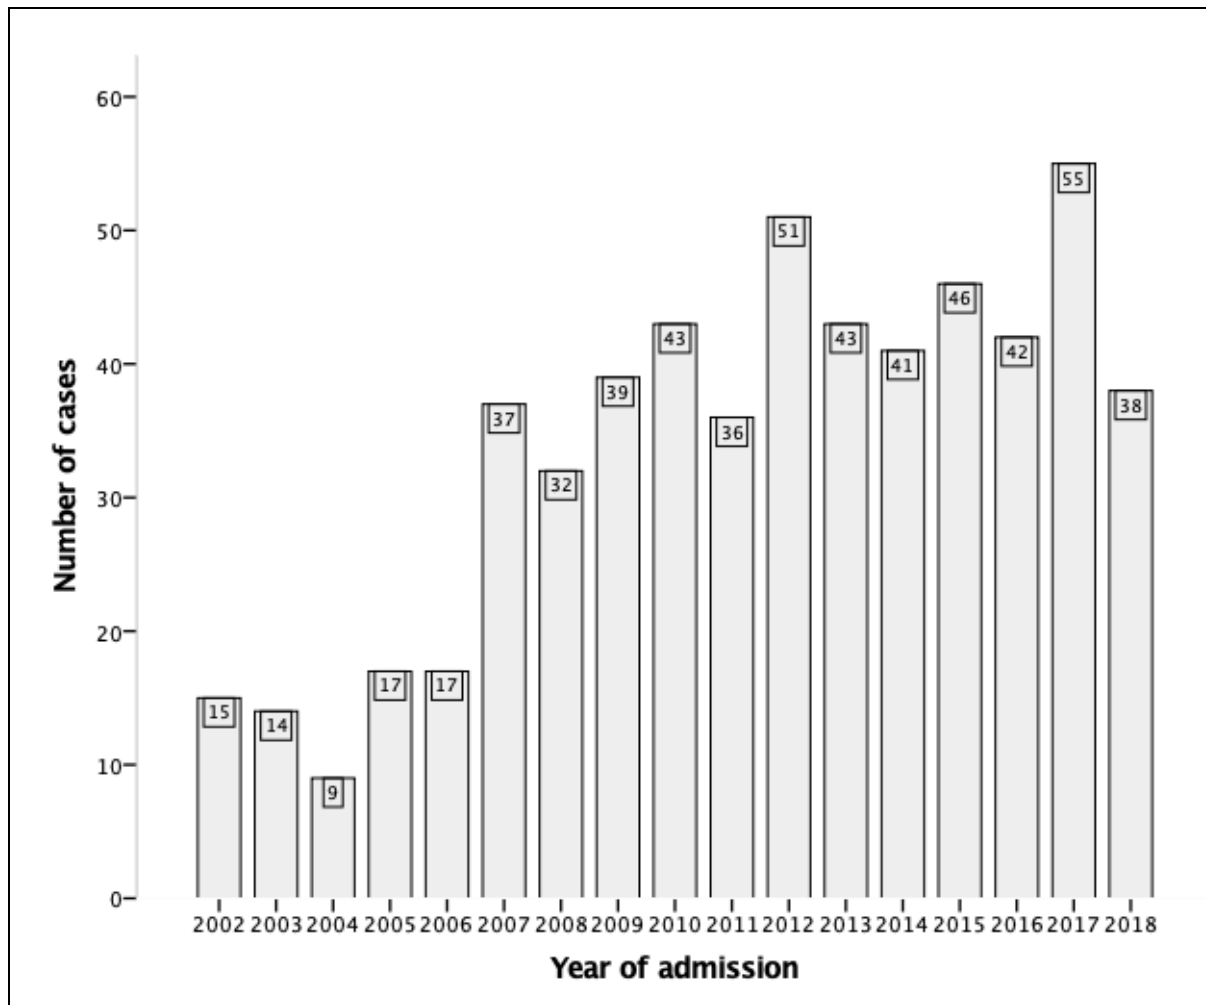

**Figure Legend**

Figure shows temporal trend of annual volume of isolated tricuspid valve surgery during study period (n=575), with a mean ( $\pm$ SD) of  $34 \pm 14$  cases per-annum. Annual case volumes significantly increased over the study period with an average rise of 2.73 cases per year (95% CI 1.95-3.50,  $p < 0.001$ ).

**Figure 1. Temporal trend of annual isolated tricuspid valve surgical volume during study period.**



**Figure Legend**

Figure shows temporal trend of annual volume of isolated tricuspid valve surgery during study period (n=575), with a mean ( $\pm$ SD) of  $34 \pm 14$  cases per-annum. Annual case volumes significantly increased over the study period with an average rise of 2.73 cases per year (95% CI 1.95-3.50,  $p < 0.001$ ).

# Reporting checklist for cohort study.

Based on the STROBE cohort guidelines.

## Instructions to authors

Complete this checklist by entering the page numbers from your manuscript where readers will find each of the items listed below.

Your article may not currently address all the items on the checklist. Please modify your text to include the missing information. If you are certain that an item does not apply, please write "n/a" and provide a short explanation.

Upload your completed checklist as an extra file when you submit to a journal.

In your methods section, say that you used the STROBE cohort reporting guidelines, and cite them as:

von Elm E, Altman DG, Egger M, Pocock SJ, Gøtzsche PC, Vandenbroucke JP. The Strengthening of Reporting of Observational Studies in Epidemiology (STROBE) Statement: guidelines for reporting observational studies.

|                           |                                                                                                        |  | Page   |
|---------------------------|--------------------------------------------------------------------------------------------------------|--|--------|
|                           | Reporting Item                                                                                         |  | Number |
| <b>Title and abstract</b> |                                                                                                        |  |        |
| Title                     | <a href="#">#1a</a> Indicate the study's design with a commonly used term in the title or the abstract |  | 1      |



|    |                      |                     |                                                     |            |
|----|----------------------|---------------------|-----------------------------------------------------|------------|
| 1  | Abstract             | <a href="#">#1b</a> | Provide in the abstract an informative and          | 3-4        |
| 2  |                      |                     |                                                     |            |
| 3  |                      |                     |                                                     |            |
| 4  |                      |                     | balanced summary of what was done and what          |            |
| 5  |                      |                     |                                                     |            |
| 6  |                      |                     | was found                                           |            |
| 7  |                      |                     |                                                     |            |
| 8  |                      |                     |                                                     |            |
| 9  | <b>Introduction</b>  |                     |                                                     |            |
| 10 |                      |                     |                                                     |            |
| 11 |                      |                     |                                                     |            |
| 12 | Background /         | <a href="#">#2</a>  | Explain the scientific background and rationale for | 6-7        |
| 13 |                      |                     |                                                     |            |
| 14 | rationale            |                     | the investigation being reported                    |            |
| 15 |                      |                     |                                                     |            |
| 16 |                      |                     |                                                     |            |
| 17 | Objectives           | <a href="#">#3</a>  | State specific objectives, including any            | 7          |
| 18 |                      |                     |                                                     |            |
| 19 |                      |                     | prespecified hypotheses                             |            |
| 20 |                      |                     |                                                     |            |
| 21 |                      |                     |                                                     |            |
| 22 |                      |                     |                                                     |            |
| 23 | <b>Methods</b>       |                     |                                                     |            |
| 24 |                      |                     |                                                     |            |
| 25 |                      |                     |                                                     |            |
| 26 | Study design         | <a href="#">#4</a>  | Present key elements of study design early in the   | 8          |
| 27 |                      |                     |                                                     |            |
| 28 |                      |                     | paper                                               |            |
| 29 |                      |                     |                                                     |            |
| 30 |                      |                     |                                                     |            |
| 31 | Setting              | <a href="#">#5</a>  | Describe the setting, locations, and relevant       | 8          |
| 32 |                      |                     |                                                     |            |
| 33 |                      |                     | dates, including periods of recruitment, exposure,  |            |
| 34 |                      |                     |                                                     |            |
| 35 |                      |                     | follow-up, and data collection                      |            |
| 36 |                      |                     |                                                     |            |
| 37 |                      |                     |                                                     |            |
| 38 |                      |                     |                                                     |            |
| 39 | Eligibility criteria | <a href="#">#6a</a> | Give the eligibility criteria, and the sources and  | 8          |
| 40 |                      |                     |                                                     |            |
| 41 |                      |                     | methods of selection of participants. Describe      |            |
| 42 |                      |                     |                                                     |            |
| 43 |                      |                     | methods of follow-up.                               |            |
| 44 |                      |                     |                                                     |            |
| 45 |                      |                     |                                                     |            |
| 46 | Eligibility criteria | <a href="#">#6b</a> | For matched studies, give matching criteria and     | n/a (not a |
| 47 |                      |                     |                                                     | matched    |
| 48 |                      |                     | number of exposed and unexposed                     | study)     |
| 49 |                      |                     |                                                     |            |
| 50 |                      |                     |                                                     |            |
| 51 |                      |                     |                                                     |            |
| 52 |                      |                     |                                                     |            |
| 53 |                      |                     |                                                     |            |
| 54 | Variables            | <a href="#">#7</a>  | Clearly define all outcomes, exposures,             | 8-9        |
| 55 |                      |                     |                                                     |            |
| 56 |                      |                     | predictors, potential confounders, and effect       |            |
| 57 |                      |                     |                                                     |            |
| 58 |                      |                     |                                                     |            |
| 59 |                      |                     |                                                     |            |
| 60 |                      |                     |                                                     |            |

|    |                |                                                                        |       |
|----|----------------|------------------------------------------------------------------------|-------|
| 1  |                | modifiers. Give diagnostic criteria, if applicable                     |       |
| 2  |                |                                                                        |       |
| 3  |                |                                                                        |       |
| 4  | Data sources / | <a href="#">#8</a> For each variable of interest give sources of data  | 8-9   |
| 5  |                |                                                                        |       |
| 6  | measurement    | and details of methods of assessment                                   |       |
| 7  |                |                                                                        |       |
| 8  |                | (measurement). Describe comparability of                               |       |
| 9  |                |                                                                        |       |
| 10 |                | assessment methods if there is more than one                           |       |
| 11 |                |                                                                        |       |
| 12 |                | group. Give information separately for for                             |       |
| 13 |                |                                                                        |       |
| 14 |                | exposed and unexposed groups if applicable.                            |       |
| 15 |                |                                                                        |       |
| 16 |                |                                                                        |       |
| 17 |                |                                                                        |       |
| 18 | Bias           | <a href="#">#9</a> Describe any efforts to address potential sources   | 9-10  |
| 19 |                |                                                                        |       |
| 20 |                | of bias                                                                |       |
| 21 |                |                                                                        |       |
| 22 |                |                                                                        |       |
| 23 | Study size     | <a href="#">#10</a> Explain how the study size was arrived at          | 8     |
| 24 |                |                                                                        |       |
| 25 |                |                                                                        |       |
| 26 | Quantitative   | <a href="#">#11</a> Explain how quantitative variables were handled    | 11-12 |
| 27 |                |                                                                        |       |
| 28 | variables      | in the analyses. If applicable, describe which                         |       |
| 29 |                |                                                                        |       |
| 30 |                | groupings were chosen, and why                                         |       |
| 31 |                |                                                                        |       |
| 32 |                |                                                                        |       |
| 33 |                |                                                                        |       |
| 34 | Statistical    | <a href="#">#12a</a> Describe all statistical methods, including those |       |
| 35 |                |                                                                        |       |
| 36 | methods        | used to control for confounding                                        |       |
| 37 |                |                                                                        |       |
| 38 |                |                                                                        |       |
| 39 |                |                                                                        |       |
| 40 |                |                                                                        |       |
| 41 |                |                                                                        |       |
| 42 |                |                                                                        |       |
| 43 |                |                                                                        |       |
| 44 | Statistical    | <a href="#">#12b</a> Describe any methods used to examine              | 11-12 |
| 45 |                |                                                                        |       |
| 46 | methods        | subgroups and interactions                                             |       |
| 47 |                |                                                                        |       |
| 48 |                |                                                                        |       |
| 49 | Statistical    | <a href="#">#12c</a> Explain how missing data were addressed           | 8     |
| 50 |                |                                                                        |       |
| 51 | methods        |                                                                        |       |
| 52 |                |                                                                        |       |
| 53 |                |                                                                        |       |
| 54 | Statistical    | <a href="#">#12d</a> If applicable, explain how loss to follow-up was  | n/a   |
| 55 |                |                                                                        |       |
| 56 | methods        | addressed                                                              |       |
| 57 |                |                                                                        |       |
| 58 |                |                                                                        |       |
| 59 |                |                                                                        |       |
| 60 |                |                                                                        |       |

11-12

|    |                  |                      |                                                      |         |
|----|------------------|----------------------|------------------------------------------------------|---------|
| 1  | Statistical      | <a href="#">#12e</a> | Describe any sensitivity analyses                    | n/a     |
| 2  |                  |                      |                                                      |         |
| 3  | methods          |                      |                                                      |         |
| 4  |                  |                      |                                                      |         |
| 5  |                  |                      |                                                      |         |
| 6  |                  |                      |                                                      |         |
| 7  |                  |                      |                                                      |         |
| 8  |                  |                      |                                                      |         |
| 9  | <b>Results</b>   |                      |                                                      |         |
| 10 |                  |                      |                                                      |         |
| 11 |                  |                      |                                                      |         |
| 12 | Participants     | <a href="#">#13a</a> | Report numbers of individuals at each stage of       | 13      |
| 13 |                  |                      | study—eg numbers potentially eligible, examined      |         |
| 14 |                  |                      | for eligibility, confirmed eligible, included in the |         |
| 15 |                  |                      | study, completing follow-up, and analysed. Give      |         |
| 16 |                  |                      | information separately for for exposed and           |         |
| 17 |                  |                      | unexposed groups if applicable.                      |         |
| 18 |                  |                      |                                                      |         |
| 19 |                  |                      |                                                      |         |
| 20 |                  |                      |                                                      |         |
| 21 |                  |                      |                                                      |         |
| 22 |                  |                      |                                                      |         |
| 23 |                  |                      |                                                      |         |
| 24 |                  |                      |                                                      |         |
| 25 |                  |                      |                                                      |         |
| 26 |                  |                      |                                                      |         |
| 27 | Participants     | <a href="#">#13b</a> | Give reasons for non-participation at each stage     | 13      |
| 28 |                  |                      |                                                      |         |
| 29 |                  |                      |                                                      |         |
| 30 | Participants     | <a href="#">#13c</a> | Consider use of a flow diagram                       | 13      |
| 31 |                  |                      |                                                      |         |
| 32 |                  |                      |                                                      |         |
| 33 |                  |                      |                                                      | (Figure |
| 34 |                  |                      |                                                      | 1)      |
| 35 |                  |                      |                                                      |         |
| 36 |                  |                      |                                                      |         |
| 37 |                  |                      |                                                      |         |
| 38 |                  |                      |                                                      |         |
| 39 |                  |                      |                                                      |         |
| 40 |                  |                      |                                                      |         |
| 41 | Descriptive data | <a href="#">#14a</a> | Give characteristics of study participants (eg       | 13-15,  |
| 42 |                  |                      | demographic, clinical, social) and information on    | Table 1 |
| 43 |                  |                      | exposures and potential confounders. Give            |         |
| 44 |                  |                      | information separately for exposed and               |         |
| 45 |                  |                      | unexposed groups if applicable.                      |         |
| 46 |                  |                      |                                                      |         |
| 47 |                  |                      |                                                      |         |
| 48 |                  |                      |                                                      |         |
| 49 |                  |                      |                                                      |         |
| 50 |                  |                      |                                                      |         |
| 51 |                  |                      |                                                      |         |
| 52 |                  |                      |                                                      |         |
| 53 | Descriptive data | <a href="#">#14b</a> | Indicate number of participants with missing data    | n/a     |
| 54 |                  |                      | for each variable of interest                        |         |
| 55 |                  |                      |                                                      |         |
| 56 |                  |                      |                                                      |         |
| 57 |                  |                      |                                                      |         |
| 58 |                  |                      |                                                      |         |
| 59 |                  |                      |                                                      |         |
| 60 |                  |                      |                                                      |         |

|    |                  |                      |                                                   |
|----|------------------|----------------------|---------------------------------------------------|
| 1  |                  |                      |                                                   |
| 2  |                  |                      |                                                   |
| 3  |                  |                      |                                                   |
| 4  | Descriptive data | <a href="#">#14c</a> | Summarise follow-up time (eg, average and total   |
| 5  |                  |                      | amount)                                           |
| 6  |                  |                      |                                                   |
| 7  |                  |                      |                                                   |
| 8  |                  |                      |                                                   |
| 9  |                  |                      |                                                   |
| 10 |                  |                      |                                                   |
| 11 |                  |                      |                                                   |
| 12 |                  |                      |                                                   |
| 13 | Outcome data     | <a href="#">#15</a>  | Report numbers of outcome events or summary       |
| 14 |                  |                      | measures over time. Give information separately   |
| 15 |                  |                      | for exposed and unexposed groups if applicable.   |
| 16 |                  |                      |                                                   |
| 17 |                  |                      |                                                   |
| 18 |                  |                      |                                                   |
| 19 |                  |                      |                                                   |
| 20 |                  |                      |                                                   |
| 21 |                  |                      |                                                   |
| 22 |                  |                      |                                                   |
| 23 | Main results     | <a href="#">#16a</a> | Give unadjusted estimates and, if applicable,     |
| 24 |                  |                      | confounder-adjusted estimates and their precision |
| 25 |                  |                      | (eg, 95% confidence interval). Make clear which   |
| 26 |                  |                      | confounders were adjusted for and why they were   |
| 27 |                  |                      | included                                          |
| 28 |                  |                      |                                                   |
| 29 |                  |                      |                                                   |
| 30 |                  |                      |                                                   |
| 31 |                  |                      |                                                   |
| 32 |                  |                      |                                                   |
| 33 |                  |                      |                                                   |
| 34 |                  |                      |                                                   |
| 35 |                  |                      |                                                   |
| 36 | Main results     | <a href="#">#16b</a> | Report category boundaries when continuous        |
| 37 |                  |                      | variables were categorized                        |
| 38 |                  |                      |                                                   |
| 39 |                  |                      |                                                   |
| 40 |                  |                      |                                                   |
| 41 | Main results     | <a href="#">#16c</a> | If relevant, consider translating estimates of    |
| 42 |                  |                      | relative risk into absolute risk for a meaningful |
| 43 |                  |                      | time period                                       |
| 44 |                  |                      |                                                   |
| 45 |                  |                      |                                                   |
| 46 |                  |                      |                                                   |
| 47 |                  |                      |                                                   |
| 48 |                  |                      |                                                   |
| 49 |                  |                      |                                                   |
| 50 |                  |                      |                                                   |
| 51 |                  |                      |                                                   |
| 52 | Other analyses   | <a href="#">#17</a>  | Report other analyses done—eg analyses of         |
| 53 |                  |                      | subgroups and interactions, and sensitivity       |
| 54 |                  |                      | analyses                                          |
| 55 |                  |                      |                                                   |
| 56 |                  |                      |                                                   |
| 57 |                  |                      |                                                   |
| 58 |                  |                      |                                                   |
| 59 |                  |                      |                                                   |
| 60 |                  |                      |                                                   |

1 **Discussion**

2

3

4 **Key results** [#18](#) Summarise key results with reference to study 19  
 5 objectives  
 6  
 7

8  
 9 **Limitations** [#19](#) Discuss limitations of the study, taking into 23-24  
 10 account sources of potential bias or imprecision.  
 11  
 12 Discuss both direction and magnitude of any  
 13  
 14 potential bias.  
 15  
 16

17  
 18  
 19 **Interpretation** [#20](#) Give a cautious overall interpretation considering 19-23  
 20 objectives, limitations, multiplicity of analyses,  
 21  
 22 results from similar studies, and other relevant  
 23  
 24 evidence.  
 25  
 26

27  
 28  
 29 **Generalisability** [#21](#) Discuss the generalisability (external validity) of 22-23  
 30 the study results  
 31  
 32

33  
 34 **Other**

35  
 36 **Information**

37  
 38  
 39  
 40 **Funding** [#22](#) Give the source of funding and the role of the 1  
 41 funders for the present study and, if applicable,  
 42  
 43 for the original study on which the present article  
 44  
 45 is based  
 46  
 47  
 48  
 49  
 50  
 51

52 None The STROBE checklist is distributed under the terms of the Creative Commons Attribution  
 53 License CC-BY. This checklist can be completed online using <https://www.goodreports.org/>, a tool  
 54  
 55 made by the [EQUATOR Network](#) in collaboration with [Penelope.ai](#)  
 56  
 57  
 58
