# Supplementary material for: Morbidity and mortality outcomes of patients requiring isolated tricuspid valve surgery: a retrospective cohort study of 537 patients in New South Wales between 2002 and 2018
Source: PubMed Central journal article supplement — BMJ Open. 2024 May 7;14(5):e080804. doi: 10.1136/bmjopen-2023-080804 (PMC11086187; doi:10.1136/bmjopen-2023-080804), 2024-05-07
Supplement: bmjopen-2023-080804supp001.pdf [file bmjopen-2023-080804supp001.pdf]

# Reporting checklist for cohort study.

Based on the STROBE cohort guidelines.

## Instructions to authors

Complete this checklist by entering the page numbers from your manuscript where readers will find each of the items listed below.

Your article may not currently address all the items on the checklist. Please modify your text to include the missing information. If you are certain that an item does not apply, please write "n/a" and provide a short explanation.

Upload your completed checklist as an extra file when you submit to a journal.

In your methods section, say that you used the STROBE cohort reporting guidelines, and cite them as:

von Elm E, Altman DG, Egger M, Pocock SJ, Gøtzsche PC, Vandenbroucke JP. The Strengthening the Reporting of Observational Studies in Epidemiology (STROBE) Statement: guidelines for reporting observational studies.

|                           |                                                                                                        |  | Page   |
|---------------------------|--------------------------------------------------------------------------------------------------------|--|--------|
|                           | Reporting Item                                                                                         |  | Number |
| <b>Title and abstract</b> |                                                                                                        |  |        |
| Title                     | <a href="#">#1a</a> Indicate the study's design with a commonly used term in the title or the abstract |  | 1      |

For peer review only - <http://bmjopen.bmj.com/site/about/guidelines.xhtml>

|    |                      |                     |                                                     |            |
|----|----------------------|---------------------|-----------------------------------------------------|------------|
| 1  | Abstract             | <a href="#">#1b</a> | Provide in the abstract an informative and          | 3-4        |
| 2  |                      |                     |                                                     |            |
| 3  |                      |                     |                                                     |            |
| 4  |                      |                     | balanced summary of what was done and what          |            |
| 5  |                      |                     |                                                     |            |
| 6  |                      |                     | was found                                           |            |
| 7  |                      |                     |                                                     |            |
| 8  |                      |                     |                                                     |            |
| 9  | <b>Introduction</b>  |                     |                                                     |            |
| 10 |                      |                     |                                                     |            |
| 11 |                      |                     |                                                     |            |
| 12 | Background /         | <a href="#">#2</a>  | Explain the scientific background and rationale for | 6-7        |
| 13 |                      |                     |                                                     |            |
| 14 | rationale            |                     | the investigation being reported                    |            |
| 15 |                      |                     |                                                     |            |
| 16 |                      |                     |                                                     |            |
| 17 | Objectives           | <a href="#">#3</a>  | State specific objectives, including any            | 7          |
| 18 |                      |                     |                                                     |            |
| 19 |                      |                     | prespecified hypotheses                             |            |
| 20 |                      |                     |                                                     |            |
| 21 |                      |                     |                                                     |            |
| 22 | <b>Methods</b>       |                     |                                                     |            |
| 23 |                      |                     |                                                     |            |
| 24 |                      |                     |                                                     |            |
| 25 |                      |                     |                                                     |            |
| 26 | Study design         | <a href="#">#4</a>  | Present key elements of study design early in the   | 8          |
| 27 |                      |                     |                                                     |            |
| 28 |                      |                     | paper                                               |            |
| 29 |                      |                     |                                                     |            |
| 30 |                      |                     |                                                     |            |
| 31 | Setting              | <a href="#">#5</a>  | Describe the setting, locations, and relevant       | 8          |
| 32 |                      |                     |                                                     |            |
| 33 |                      |                     | dates, including periods of recruitment, exposure,  |            |
| 34 |                      |                     |                                                     |            |
| 35 |                      |                     | follow-up, and data collection                      |            |
| 36 |                      |                     |                                                     |            |
| 37 |                      |                     |                                                     |            |
| 38 |                      |                     |                                                     |            |
| 39 | Eligibility criteria | <a href="#">#6a</a> | Give the eligibility criteria, and the sources and  | 8          |
| 40 |                      |                     |                                                     |            |
| 41 |                      |                     | methods of selection of participants. Describe      |            |
| 42 |                      |                     |                                                     |            |
| 43 |                      |                     | methods of follow-up.                               |            |
| 44 |                      |                     |                                                     |            |
| 45 |                      |                     |                                                     |            |
| 46 | Eligibility criteria | <a href="#">#6b</a> | For matched studies, give matching criteria and     | n/a (not a |
| 47 |                      |                     |                                                     | matched    |
| 48 |                      |                     | number of exposed and unexposed                     | study)     |
| 49 |                      |                     |                                                     |            |
| 50 |                      |                     |                                                     |            |
| 51 |                      |                     |                                                     |            |
| 52 |                      |                     |                                                     |            |
| 53 |                      |                     |                                                     |            |
| 54 | Variables            | <a href="#">#7</a>  | Clearly define all outcomes, exposures,             | 8-9        |
| 55 |                      |                     |                                                     |            |
| 56 |                      |                     | predictors, potential confounders, and effect       |            |
| 57 |                      |                     |                                                     |            |
| 58 |                      |                     |                                                     |            |
| 59 |                      |                     |                                                     |            |
| 60 |                      |                     |                                                     |            |

|    |                |                      |                                                    |       |
|----|----------------|----------------------|----------------------------------------------------|-------|
| 1  |                |                      | modifiers. Give diagnostic criteria, if applicable |       |
| 2  |                |                      |                                                    |       |
| 3  |                |                      |                                                    |       |
| 4  | Data sources / | <a href="#">#8</a>   | For each variable of interest give sources of data | 8-9   |
| 5  |                |                      |                                                    |       |
| 6  | measurement    |                      | and details of methods of assessment               |       |
| 7  |                |                      |                                                    |       |
| 8  |                |                      | (measurement). Describe comparability of           |       |
| 9  |                |                      |                                                    |       |
| 10 |                |                      | assessment methods if there is more than one       |       |
| 11 |                |                      |                                                    |       |
| 12 |                |                      | group. Give information separately for for         |       |
| 13 |                |                      |                                                    |       |
| 14 |                |                      | exposed and unexposed groups if applicable.        |       |
| 15 |                |                      |                                                    |       |
| 16 |                |                      |                                                    |       |
| 17 |                |                      |                                                    |       |
| 18 | Bias           | <a href="#">#9</a>   | Describe any efforts to address potential sources  | 9-10  |
| 19 |                |                      |                                                    |       |
| 20 |                |                      | of bias                                            |       |
| 21 |                |                      |                                                    |       |
| 22 |                |                      |                                                    |       |
| 23 | Study size     | <a href="#">#10</a>  | Explain how the study size was arrived at          | 8     |
| 24 |                |                      |                                                    |       |
| 25 |                |                      |                                                    |       |
| 26 | Quantitative   | <a href="#">#11</a>  | Explain how quantitative variables were handled    | 11-12 |
| 27 |                |                      |                                                    |       |
| 28 | variables      |                      | in the analyses. If applicable, describe which     |       |
| 29 |                |                      |                                                    |       |
| 30 |                |                      | groupings were chosen, and why                     |       |
| 31 |                |                      |                                                    |       |
| 32 |                |                      |                                                    |       |
| 33 |                |                      |                                                    |       |
| 34 | Statistical    | <a href="#">#12a</a> | Describe all statistical methods, including those  |       |
| 35 |                |                      |                                                    |       |
| 36 | methods        |                      | used to control for confounding                    |       |
| 37 |                |                      |                                                    |       |
| 38 |                |                      |                                                    |       |
| 39 |                |                      |                                                    |       |
| 40 |                |                      |                                                    |       |
| 41 |                |                      |                                                    |       |
| 42 |                |                      |                                                    |       |
| 43 |                |                      |                                                    |       |
| 44 | Statistical    | <a href="#">#12b</a> | Describe any methods used to examine               | 11-12 |
| 45 |                |                      |                                                    |       |
| 46 | methods        |                      | subgroups and interactions                         |       |
| 47 |                |                      |                                                    |       |
| 48 |                |                      |                                                    |       |
| 49 | Statistical    | <a href="#">#12c</a> | Explain how missing data were addressed            | 8     |
| 50 |                |                      |                                                    |       |
| 51 | methods        |                      |                                                    |       |
| 52 |                |                      |                                                    |       |
| 53 |                |                      |                                                    |       |
| 54 |                |                      |                                                    |       |
| 55 | Statistical    | <a href="#">#12d</a> | If applicable, explain how loss to follow-up was   | n/a   |
| 56 |                |                      |                                                    |       |
| 57 | methods        |                      | addressed                                          |       |
| 58 |                |                      |                                                    |       |
| 59 |                |                      |                                                    |       |
| 60 |                |                      |                                                    |       |

11-12

|    |                  |                      |                                                      |         |
|----|------------------|----------------------|------------------------------------------------------|---------|
| 1  | Statistical      | <a href="#">#12e</a> | Describe any sensitivity analyses                    | n/a     |
| 2  |                  |                      |                                                      |         |
| 3  | methods          |                      |                                                      |         |
| 4  |                  |                      |                                                      |         |
| 5  |                  |                      |                                                      |         |
| 6  |                  |                      |                                                      |         |
| 7  |                  |                      |                                                      |         |
| 8  |                  |                      |                                                      |         |
| 9  |                  |                      |                                                      |         |
| 10 | <b>Results</b>   |                      |                                                      |         |
| 11 |                  |                      |                                                      |         |
| 12 |                  |                      |                                                      |         |
| 13 | Participants     | <a href="#">#13a</a> | Report numbers of individuals at each stage of       | 13      |
| 14 |                  |                      | study—eg numbers potentially eligible, examined      |         |
| 15 |                  |                      | for eligibility, confirmed eligible, included in the |         |
| 16 |                  |                      | study, completing follow-up, and analysed. Give      |         |
| 17 |                  |                      | information separately for for exposed and           |         |
| 18 |                  |                      | unexposed groups if applicable.                      |         |
| 19 |                  |                      |                                                      |         |
| 20 |                  |                      |                                                      |         |
| 21 |                  |                      |                                                      |         |
| 22 |                  |                      |                                                      |         |
| 23 |                  |                      |                                                      |         |
| 24 |                  |                      |                                                      |         |
| 25 |                  |                      |                                                      |         |
| 26 |                  |                      |                                                      |         |
| 27 | Participants     | <a href="#">#13b</a> | Give reasons for non-participation at each stage     | 13      |
| 28 |                  |                      |                                                      |         |
| 29 |                  |                      |                                                      |         |
| 30 | Participants     | <a href="#">#13c</a> | Consider use of a flow diagram                       | 13      |
| 31 |                  |                      |                                                      |         |
| 32 |                  |                      |                                                      |         |
| 33 |                  |                      |                                                      | (Figure |
| 34 |                  |                      |                                                      | 1)      |
| 35 |                  |                      |                                                      |         |
| 36 |                  |                      |                                                      |         |
| 37 |                  |                      |                                                      |         |
| 38 |                  |                      |                                                      |         |
| 39 |                  |                      |                                                      |         |
| 40 |                  |                      |                                                      |         |
| 41 | Descriptive data | <a href="#">#14a</a> | Give characteristics of study participants (eg       | 13-15,  |
| 42 |                  |                      | demographic, clinical, social) and information on    | Table 1 |
| 43 |                  |                      | exposures and potential confounders. Give            |         |
| 44 |                  |                      | information separately for exposed and               |         |
| 45 |                  |                      | unexposed groups if applicable.                      |         |
| 46 |                  |                      |                                                      |         |
| 47 |                  |                      |                                                      |         |
| 48 |                  |                      |                                                      |         |
| 49 |                  |                      |                                                      |         |
| 50 |                  |                      |                                                      |         |
| 51 |                  |                      |                                                      |         |
| 52 |                  |                      |                                                      |         |
| 53 | Descriptive data | <a href="#">#14b</a> | Indicate number of participants with missing data    | n/a     |
| 54 |                  |                      | for each variable of interest                        |         |
| 55 |                  |                      |                                                      |         |
| 56 |                  |                      |                                                      |         |
| 57 |                  |                      |                                                      |         |
| 58 |                  |                      |                                                      |         |
| 59 |                  |                      |                                                      |         |
| 60 |                  |                      |                                                      |         |

|    |                  |                      |                                                                                                                                                                                                          |       |
|----|------------------|----------------------|----------------------------------------------------------------------------------------------------------------------------------------------------------------------------------------------------------|-------|
| 1  |                  |                      |                                                                                                                                                                                                          |       |
| 2  |                  |                      |                                                                                                                                                                                                          |       |
| 3  |                  |                      |                                                                                                                                                                                                          |       |
| 4  | Descriptive data | <a href="#">#14c</a> | Summarise follow-up time (eg, average and total amount)                                                                                                                                                  | 15    |
| 5  |                  |                      |                                                                                                                                                                                                          |       |
| 6  |                  |                      |                                                                                                                                                                                                          |       |
| 7  |                  |                      |                                                                                                                                                                                                          |       |
| 8  |                  |                      |                                                                                                                                                                                                          |       |
| 9  |                  |                      |                                                                                                                                                                                                          |       |
| 10 |                  |                      |                                                                                                                                                                                                          |       |
| 11 |                  |                      |                                                                                                                                                                                                          |       |
| 12 |                  |                      |                                                                                                                                                                                                          |       |
| 13 | Outcome data     | <a href="#">#15</a>  | Report numbers of outcome events or summary measures over time. Give information separately for exposed and unexposed groups if applicable.                                                              | 13-17 |
| 14 |                  |                      |                                                                                                                                                                                                          |       |
| 15 |                  |                      |                                                                                                                                                                                                          |       |
| 16 |                  |                      |                                                                                                                                                                                                          |       |
| 17 |                  |                      |                                                                                                                                                                                                          |       |
| 18 |                  |                      |                                                                                                                                                                                                          |       |
| 19 |                  |                      |                                                                                                                                                                                                          |       |
| 20 |                  |                      |                                                                                                                                                                                                          |       |
| 21 |                  |                      |                                                                                                                                                                                                          |       |
| 22 |                  |                      |                                                                                                                                                                                                          |       |
| 23 | Main results     | <a href="#">#16a</a> | Give unadjusted estimates and, if applicable, confounder-adjusted estimates and their precision (eg, 95% confidence interval). Make clear which confounders were adjusted for and why they were included | 17-18 |
| 24 |                  |                      |                                                                                                                                                                                                          |       |
| 25 |                  |                      |                                                                                                                                                                                                          |       |
| 26 |                  |                      |                                                                                                                                                                                                          |       |
| 27 |                  |                      |                                                                                                                                                                                                          |       |
| 28 |                  |                      |                                                                                                                                                                                                          |       |
| 29 |                  |                      |                                                                                                                                                                                                          |       |
| 30 |                  |                      |                                                                                                                                                                                                          |       |
| 31 |                  |                      |                                                                                                                                                                                                          |       |
| 32 |                  |                      |                                                                                                                                                                                                          |       |
| 33 |                  |                      |                                                                                                                                                                                                          |       |
| 34 |                  |                      |                                                                                                                                                                                                          |       |
| 35 |                  |                      |                                                                                                                                                                                                          |       |
| 36 | Main results     | <a href="#">#16b</a> | Report category boundaries when continuous variables were categorized                                                                                                                                    | 17-18 |
| 37 |                  |                      |                                                                                                                                                                                                          |       |
| 38 |                  |                      |                                                                                                                                                                                                          |       |
| 39 |                  |                      |                                                                                                                                                                                                          |       |
| 40 |                  |                      |                                                                                                                                                                                                          |       |
| 41 | Main results     | <a href="#">#16c</a> | If relevant, consider translating estimates of relative risk into absolute risk for a meaningful time period                                                                                             | N/a   |
| 42 |                  |                      |                                                                                                                                                                                                          |       |
| 43 |                  |                      |                                                                                                                                                                                                          |       |
| 44 |                  |                      |                                                                                                                                                                                                          |       |
| 45 |                  |                      |                                                                                                                                                                                                          |       |
| 46 |                  |                      |                                                                                                                                                                                                          |       |
| 47 |                  |                      |                                                                                                                                                                                                          |       |
| 48 |                  |                      |                                                                                                                                                                                                          |       |
| 49 |                  |                      |                                                                                                                                                                                                          |       |
| 50 |                  |                      |                                                                                                                                                                                                          |       |
| 51 |                  |                      |                                                                                                                                                                                                          |       |
| 52 | Other analyses   | <a href="#">#17</a>  | Report other analyses done—eg analyses of subgroups and interactions, and sensitivity analyses                                                                                                           | 17-18 |
| 53 |                  |                      |                                                                                                                                                                                                          |       |
| 54 |                  |                      |                                                                                                                                                                                                          |       |
| 55 |                  |                      |                                                                                                                                                                                                          |       |
| 56 |                  |                      |                                                                                                                                                                                                          |       |
| 57 |                  |                      |                                                                                                                                                                                                          |       |
| 58 |                  |                      |                                                                                                                                                                                                          |       |
| 59 |                  |                      |                                                                                                                                                                                                          |       |
| 60 |                  |                      |                                                                                                                                                                                                          |       |

|    |                                                                                                                                                                                                                                                                                                                                    |                     |                                                                                                                                                                  |       |
|----|------------------------------------------------------------------------------------------------------------------------------------------------------------------------------------------------------------------------------------------------------------------------------------------------------------------------------------|---------------------|------------------------------------------------------------------------------------------------------------------------------------------------------------------|-------|
| 1  | <b>Discussion</b>                                                                                                                                                                                                                                                                                                                  |                     |                                                                                                                                                                  |       |
| 2  |                                                                                                                                                                                                                                                                                                                                    |                     |                                                                                                                                                                  |       |
| 3  |                                                                                                                                                                                                                                                                                                                                    |                     |                                                                                                                                                                  |       |
| 4  | Key results                                                                                                                                                                                                                                                                                                                        | <a href="#">#18</a> | Summarise key results with reference to study objectives                                                                                                         | 19    |
| 5  |                                                                                                                                                                                                                                                                                                                                    |                     |                                                                                                                                                                  |       |
| 6  |                                                                                                                                                                                                                                                                                                                                    |                     |                                                                                                                                                                  |       |
| 7  |                                                                                                                                                                                                                                                                                                                                    |                     |                                                                                                                                                                  |       |
| 8  |                                                                                                                                                                                                                                                                                                                                    |                     |                                                                                                                                                                  |       |
| 9  |                                                                                                                                                                                                                                                                                                                                    |                     |                                                                                                                                                                  |       |
| 10 | Limitations                                                                                                                                                                                                                                                                                                                        | <a href="#">#19</a> | Discuss limitations of the study, taking into account sources of potential bias or imprecision. Discuss both direction and magnitude of any potential bias.      | 23-24 |
| 11 |                                                                                                                                                                                                                                                                                                                                    |                     |                                                                                                                                                                  |       |
| 12 |                                                                                                                                                                                                                                                                                                                                    |                     |                                                                                                                                                                  |       |
| 13 |                                                                                                                                                                                                                                                                                                                                    |                     |                                                                                                                                                                  |       |
| 14 |                                                                                                                                                                                                                                                                                                                                    |                     |                                                                                                                                                                  |       |
| 15 |                                                                                                                                                                                                                                                                                                                                    |                     |                                                                                                                                                                  |       |
| 16 |                                                                                                                                                                                                                                                                                                                                    |                     |                                                                                                                                                                  |       |
| 17 |                                                                                                                                                                                                                                                                                                                                    |                     |                                                                                                                                                                  |       |
| 18 |                                                                                                                                                                                                                                                                                                                                    |                     |                                                                                                                                                                  |       |
| 19 |                                                                                                                                                                                                                                                                                                                                    |                     |                                                                                                                                                                  |       |
| 20 | Interpretation                                                                                                                                                                                                                                                                                                                     | <a href="#">#20</a> | Give a cautious overall interpretation considering objectives, limitations, multiplicity of analyses, results from similar studies, and other relevant evidence. | 19-23 |
| 21 |                                                                                                                                                                                                                                                                                                                                    |                     |                                                                                                                                                                  |       |
| 22 |                                                                                                                                                                                                                                                                                                                                    |                     |                                                                                                                                                                  |       |
| 23 |                                                                                                                                                                                                                                                                                                                                    |                     |                                                                                                                                                                  |       |
| 24 |                                                                                                                                                                                                                                                                                                                                    |                     |                                                                                                                                                                  |       |
| 25 |                                                                                                                                                                                                                                                                                                                                    |                     |                                                                                                                                                                  |       |
| 26 |                                                                                                                                                                                                                                                                                                                                    |                     |                                                                                                                                                                  |       |
| 27 |                                                                                                                                                                                                                                                                                                                                    |                     |                                                                                                                                                                  |       |
| 28 |                                                                                                                                                                                                                                                                                                                                    |                     |                                                                                                                                                                  |       |
| 29 | Generalisability                                                                                                                                                                                                                                                                                                                   | <a href="#">#21</a> | Discuss the generalisability (external validity) of the study results                                                                                            | 22-23 |
| 30 |                                                                                                                                                                                                                                                                                                                                    |                     |                                                                                                                                                                  |       |
| 31 |                                                                                                                                                                                                                                                                                                                                    |                     |                                                                                                                                                                  |       |
| 32 |                                                                                                                                                                                                                                                                                                                                    |                     |                                                                                                                                                                  |       |
| 33 |                                                                                                                                                                                                                                                                                                                                    |                     |                                                                                                                                                                  |       |
| 34 |                                                                                                                                                                                                                                                                                                                                    |                     |                                                                                                                                                                  |       |
| 35 | <b>Other</b>                                                                                                                                                                                                                                                                                                                       |                     |                                                                                                                                                                  |       |
| 36 |                                                                                                                                                                                                                                                                                                                                    |                     |                                                                                                                                                                  |       |
| 37 | <b>Information</b>                                                                                                                                                                                                                                                                                                                 |                     |                                                                                                                                                                  |       |
| 38 |                                                                                                                                                                                                                                                                                                                                    |                     |                                                                                                                                                                  |       |
| 39 |                                                                                                                                                                                                                                                                                                                                    |                     |                                                                                                                                                                  |       |
| 40 | Funding                                                                                                                                                                                                                                                                                                                            | <a href="#">#22</a> | Give the source of funding and the role of the funders for the present study and, if applicable, for the original study on which the present article is based    | 1     |
| 41 |                                                                                                                                                                                                                                                                                                                                    |                     |                                                                                                                                                                  |       |
| 42 |                                                                                                                                                                                                                                                                                                                                    |                     |                                                                                                                                                                  |       |
| 43 |                                                                                                                                                                                                                                                                                                                                    |                     |                                                                                                                                                                  |       |
| 44 |                                                                                                                                                                                                                                                                                                                                    |                     |                                                                                                                                                                  |       |
| 45 |                                                                                                                                                                                                                                                                                                                                    |                     |                                                                                                                                                                  |       |
| 46 |                                                                                                                                                                                                                                                                                                                                    |                     |                                                                                                                                                                  |       |
| 47 |                                                                                                                                                                                                                                                                                                                                    |                     |                                                                                                                                                                  |       |
| 48 |                                                                                                                                                                                                                                                                                                                                    |                     |                                                                                                                                                                  |       |
| 49 |                                                                                                                                                                                                                                                                                                                                    |                     |                                                                                                                                                                  |       |
| 50 |                                                                                                                                                                                                                                                                                                                                    |                     |                                                                                                                                                                  |       |
| 51 |                                                                                                                                                                                                                                                                                                                                    |                     |                                                                                                                                                                  |       |
| 52 |                                                                                                                                                                                                                                                                                                                                    |                     |                                                                                                                                                                  |       |
| 53 | None                                                                                                                                                                                                                                                                                                                               |                     |                                                                                                                                                                  |       |
| 54 | The STROBE checklist is distributed under the terms of the Creative Commons Attribution License CC-BY. This checklist can be completed online using <a href="https://www.goodreports.org/">https://www.goodreports.org/</a> , a tool made by the <a href="#">EQUATOR Network</a> in collaboration with <a href="#">Penelope.ai</a> |                     |                                                                                                                                                                  |       |
| 55 |                                                                                                                                                                                                                                                                                                                                    |                     |                                                                                                                                                                  |       |
| 56 |                                                                                                                                                                                                                                                                                                                                    |                     |                                                                                                                                                                  |       |
| 57 |                                                                                                                                                                                                                                                                                                                                    |                     |                                                                                                                                                                  |       |
| 58 |                                                                                                                                                                                                                                                                                                                                    |                     |                                                                                                                                                                  |       |
| 59 |                                                                                                                                                                                                                                                                                                                                    |                     |                                                                                                                                                                  |       |
| 60 |                                                                                                                                                                                                                                                                                                                                    |                     |                                                                                                                                                                  |       |
