# Supplementary material for: Morbidity and mortality outcomes of patients requiring isolated tricuspid valve surgery: a retrospective cohort study of 537 patients in New South Wales between 2002 and 2018
Source: PubMed Central journal article supplement — BMJ Open. 2024 May 7;14(5):e080804. doi: 10.1136/bmjopen-2023-080804 (PMC11086187; doi:10.1136/bmjopen-2023-080804), 2024-05-07
Supplement: bmjopen-2023-080804supp002.pdf [file bmjopen-2023-080804supp002.pdf]

**SUPPLEMENTARY MATERIAL**

**Morbidity and Mortality Outcomes of Patients requiring Isolated Tricuspid Valve Surgery**

**Harvey et al.**

## Table of Contents

**Supplementary Table 1.** Study comorbidities International Classification of Diseases Tenth Revision Australian Modification (ICD-10AM) codes and Australian Classification of Health Interventions (ACHI) procedural codes

**Supplementary Table 2.** Univariable associations with all-cause mortality during study period

**Supplementary Table 3.** Independent predictors for all-cause mortality during study period

**Supplementary Figure 1.** Study flow chart

**Supplementary Figure 2.** Temporal trend of tricuspid valve annuloplasty during study period

**Supplementary Figure 3.** Temporal trend of tricuspid valve replacement during study period

**Supplementary Figure 4.** Temporal trend of open tricuspid valvotomy during study period

**Supplementary Figure 5.** Temporal trend of tricuspid valve repair during study period

**Supplementary Table 1. Study comorbidities International Classification of Diseases Tenth Revision Australian Modification (ICD-10AM) codes and Australian Classification of Health Interventions (ACHI) procedural codes**

| No. | Comorbidity *                                                                                                                                                                          | ICD-10AM codes                                                                                                                                                                                                                                                                                |
|-----|----------------------------------------------------------------------------------------------------------------------------------------------------------------------------------------|-----------------------------------------------------------------------------------------------------------------------------------------------------------------------------------------------------------------------------------------------------------------------------------------------|
| 1   | Endocarditis<br>(indication for cardiac valve surgery)                                                                                                                                 | I33, I38, I39                                                                                                                                                                                                                                                                                 |
| 2   | Atrial fibrillation/flutter                                                                                                                                                            | I48                                                                                                                                                                                                                                                                                           |
| 3   | Acute myocardial infarction                                                                                                                                                            | I21, I22, I23                                                                                                                                                                                                                                                                                 |
| 4   | Ischemic heart disease                                                                                                                                                                 | I20, I21, I22, I23, I24, I25                                                                                                                                                                                                                                                                  |
| 5   | Prior PCI / CABG                                                                                                                                                                       | Z95.1, Z95.5                                                                                                                                                                                                                                                                                  |
| 6   | Congestive cardiac failure                                                                                                                                                             | I42, I43, I50, I11.0, I13.0, I13.2                                                                                                                                                                                                                                                            |
| 7   | Peripheral vascular disease                                                                                                                                                            | E09.5, E10.51, E10.52, E11.51, E11.52, E13.51, E13.52, E14.51, E14.52, I70, I71, I72, I73, I74, I77, I78, I79                                                                                                                                                                                 |
| 8   | Stroke                                                                                                                                                                                 | G45-45.9, G46-G46.8, I60, I61, I62, I63, I64                                                                                                                                                                                                                                                  |
| 9   | Prosthetic heart valve                                                                                                                                                                 | Z95.2, Z95.3, Z95.4                                                                                                                                                                                                                                                                           |
| 10  | Cardiovascular disease<br>(defined as morbidities item nos. 2, 4-9)                                                                                                                    | I48, I20-I25, Z95.1, Z95.5, I42, I43, I50, I11.0, I13.0, I13.2, I70, I71, I72, I73, I74, I77, I78, I79, E09.5, E10.51, E10.52, E11.51, E11.52, E13.51, E13.52, E14.51, E14.52, G45-45.9, G46-G46.8, I60-I62, I63-I64, Z95.2, Z95.3, Z95.4                                                     |
| 11  | Hypertension                                                                                                                                                                           | I10, I11, I12, I13, I15                                                                                                                                                                                                                                                                       |
| 12  | Hyperlipidaemia                                                                                                                                                                        | E78                                                                                                                                                                                                                                                                                           |
| 13  | Diabetes                                                                                                                                                                               | E09, E10, E11, E13, E14, Z92.22                                                                                                                                                                                                                                                               |
| 14  | Current/ex-smoker                                                                                                                                                                      | F17, Z72.0, Z86.43                                                                                                                                                                                                                                                                            |
| 15  | Cardiac risk factors<br>(defined as morbidities item nos. 11-14)                                                                                                                       | I10, I11, I12, I13, I15, E78, E09, E10, E11, E13, E14, Z92.22, Z72.0, F17, Z86.43                                                                                                                                                                                                             |
| 16  | Systemic connective tissue disease                                                                                                                                                     | M30, M31, M32, M33, M34, M35, M36                                                                                                                                                                                                                                                             |
| 17  | Chronic pulmonary disease<br>(include asthma, chronic airways limitation, interstitial lung disease, cystic fibrosis with pulmonary manifestation)                                     | E84.0, J40, J41, J42, J43, J44, J45, J46, J47, J60, J61, J62, J63, J64, J65, J66, J67, J68, J70, J82, J84, J99                                                                                                                                                                                |
| 18  | Malignancy                                                                                                                                                                             | C00-C96, D00-D09                                                                                                                                                                                                                                                                              |
| 19  | Chronic kidney disease                                                                                                                                                                 | N18, N19                                                                                                                                                                                                                                                                                      |
| 20  | Dementia                                                                                                                                                                               | F00, F01, F02, F03                                                                                                                                                                                                                                                                            |
| 21  | Neurodegenerative diseases<br>(defined as dementia, central nervous systemic atrophies, Parkinson's disease, basal ganglia degeneration and/or nervous systemic degenerative diseases) | F00, F01, F02, F03, G10-G14, G20, G23, G30, G31                                                                                                                                                                                                                                               |
| 22  | Peptic ulcer disease                                                                                                                                                                   | K25, K26, K27, K28                                                                                                                                                                                                                                                                            |
| 23  | Liver disease – mild                                                                                                                                                                   | K70.0, K70.1, K70.2, K70.9, K71.0, K71.1, K71.2, K71.3, K71.4, K71.5, K71.6, K71.8, K71.9, K73, K75, K76, K77                                                                                                                                                                                 |
| 24  | Liver disease – moderate-severe                                                                                                                                                        | I82.0, K70.3, K70.4, K71.7, K72, K74                                                                                                                                                                                                                                                          |
| 25  | Chronic kidney disease – moderate-severe                                                                                                                                               | N18.3, N18.4, N18.5                                                                                                                                                                                                                                                                           |
| 26  | Diabetes with organ damage                                                                                                                                                             | E09.21, E09.29, E09.31, E09.32, E09.40, E09.42, E09.51, E09.52, E09.71, E09.72, E09.8, E10.21, E10.22, E10.29, E10.31, E10.32, E10.33, E10.34, E10.35, E10.36, E10.39, E10.40, E10.41, E10.42, E10.43, E10.49, E10.51, E10.52, E10.53, E10.61, E10.62, E10.63, E10.69, E10.71, E10.73, E10.8, |

|    |                                                         |                                                                                                                                                                                                                                                                                                                                                                                                                                                                                                                                                                                                                                             |
|----|---------------------------------------------------------|---------------------------------------------------------------------------------------------------------------------------------------------------------------------------------------------------------------------------------------------------------------------------------------------------------------------------------------------------------------------------------------------------------------------------------------------------------------------------------------------------------------------------------------------------------------------------------------------------------------------------------------------|
|    |                                                         | E11.21, E11.22, E11.29, E11.31, E11.32, E11.33, E11.34, E11.35, E11.36, E11.39, E11.40, E11.41, E11.42, E11.43, E11.49, E11.51, E11.52, E11.53, E11.61, E11.62, E11.63, E11.69, E11.71, E11.72, E11.73, E11.8, E13.21, E13.22, E13.29, E13.31, E13.32, E13.33, E13.34, E13.35, E13.36, E13.39, E13.40, E13.41, E13.42, E13.43, E13.49, E13.51, E13.52, E13.53, E13.61, E13.62, E13.63, E13.69, E13.71, E13.72, E13.73, E13.8, E14.21, E14.22, E14.29, E14.31, E14.32, E14.33, E14.34, E14.35, E14.36, E14.39, E14.40, E14.41, E14.42, E14.43, E14.49, E14.51, E14.52, E14.53, E14.61, E14.62, E14.63, E14.69, E14.71, E14.72, E14.73, E14.8 |
| 27 | Lymphoma                                                | C81, C82, C83, C84, C85, C86, C88                                                                                                                                                                                                                                                                                                                                                                                                                                                                                                                                                                                                           |
| 28 | Leukemia                                                | C90, C91, C92, C93, C94, C95, C96                                                                                                                                                                                                                                                                                                                                                                                                                                                                                                                                                                                                           |
| 29 | Metastatic solid tumour                                 | C76, C77, C78, C79, C80                                                                                                                                                                                                                                                                                                                                                                                                                                                                                                                                                                                                                     |
| 30 | Hemiplegia                                              | G81, G82                                                                                                                                                                                                                                                                                                                                                                                                                                                                                                                                                                                                                                    |
| 31 | Acquired Immune Deficiency Syndrome (AIDS)              | B20, B21, B22, B23, B24                                                                                                                                                                                                                                                                                                                                                                                                                                                                                                                                                                                                                     |
| 32 | Any tumor/malignancy excluding lymphoma and/or leukemia | C00-C80, D00-D09                                                                                                                                                                                                                                                                                                                                                                                                                                                                                                                                                                                                                            |
| 33 | Primary pulmonary hypertension                          | I27.0                                                                                                                                                                                                                                                                                                                                                                                                                                                                                                                                                                                                                                       |
| 34 | Secondary pulmonary hypertension                        | I27.2                                                                                                                                                                                                                                                                                                                                                                                                                                                                                                                                                                                                                                       |
| 35 | Intravenous drug use (IVDU) history                     | F11, F11.0, F11.1, F11.2, F11.3, F11.4, F11.5, F11.6, F11.7, F11.8, F11.9, F15.0, F15.00, F15.01, F15.02, F15.09, F15.1, F15.10, F15.11, F15.12, F15.19, F15.2, F15.20, F15.21, F15.22, F15.29, F15.3, F15.30, F15.31, F15.32, F15.39, F15.4, F15.40, F15.41, F15.42, F15.49, F15.5, F15.50, F15.51, F15.52, F15.59, F15.6, F15.60, F15.61, F15.62, F15.69, F15.7, F15.70, F15.71, F15.72, F15.79, F15.8, F15.80, F15.81, F15.82, F15.89, F15.9, F15.90, F15.91, F15.92, F15.99, T40.0, T40.1, T40.2, T40.3, T40.4, T40.6, T43.61                                                                                                           |
| 36 | Rheumatic disease involving the tricuspid valve         | I07, I07.0, I07.1, I07.2, I07.8, I07.9, I08.1, I08.2, I08.3                                                                                                                                                                                                                                                                                                                                                                                                                                                                                                                                                                                 |

\* To calculate the Charlson Comorbidity Index (CCI) score, without age adjustment, for individual patient during a particular admission of interest, use the following morbidity item numbers with their corresponding ICD-10AM codes to derive the patient's CCI score:

- 1 score for each morbidity item – 3, 6, 7, 8, 13, 16, 17, 20, 22, 23
- 2 score for each morbidity item – 25, 26, 27, 28, 30, 32
- 3 score for morbidity item – 24
- 6 score for morbidity item – 29, 31

| No. | ACHI procedures                                                                        | ACHI procedural codes                                                                                                                                           |
|-----|----------------------------------------------------------------------------------------|-----------------------------------------------------------------------------------------------------------------------------------------------------------------|
| 1   | Coronary angiography (cardiac catheterization with or without angioplasty or stenting) | 38200-00, 38203-00, 38206-00, 38215-00, 38218-00, 38218-01, 38218-02, 38300-00, 38303-00, 38306-00, 38306-01, 38306-02                                          |
| 2   | Transoesophageal echocardiogram                                                        | 55118-00                                                                                                                                                        |
| 3   | CABG (Coronary artery bypass graft)                                                    | 38456-19, 38497-00, 38497-01, 38497-02, 38497-03, 38497-04, 39497-05, 38497-06, 38497-07, 38500-00, 38500-01, 38500-02, 38500-03, 38500-04, 38500-05, 38503-00, |

|    |                                                                                                                                                     |                                                                                                                                                                                                                                                                                                                                                                                                                          |
|----|-----------------------------------------------------------------------------------------------------------------------------------------------------|--------------------------------------------------------------------------------------------------------------------------------------------------------------------------------------------------------------------------------------------------------------------------------------------------------------------------------------------------------------------------------------------------------------------------|
|    |                                                                                                                                                     | 38503-01, 38503-02, 38503-03, 38503-04, 38503-05, 38637-00, 38653-08, 90201-00, 90201-01, 90201-02, 90201-03                                                                                                                                                                                                                                                                                                             |
| 4  | Lone tricuspid valve surgery<br>(Only single valve surgery in single admission)<br>(exclude percutaneous approach)                                  | 38456-11, 38456-17, 38475-01, 38477-01, 38480-02, 38481-02, 38488-04, 38488-05, 38489-03, 38653-06                                                                                                                                                                                                                                                                                                                       |
| 5  | Combined aortic, mitral, tricuspid and pulmonary valves surgery<br>(All four valves surgery in single admission)<br>(exclude percutaneous approach) | 38456-01, 38456-10, 38456-11, 38456-15, 38456-16, 38456-17, 38456-18, 38475-00, 38475-01, 38475-02, 38477-00, 38477-01, 38477-02, 38480-00, 38480-01, 38480-02, 38481-00, 38481-01, 38481-02, 38483-00, 38485-00, 38485-01, 38487-00, 38488-00, 38488-01, 38488-02, 38488-03, 38488-04, 38488-05, 38488-06, 38488-07, 38489-00, 38489-01, 38489-02, 38489-03, 38489-04, 38489-05, 38653-04, 38653-05, 38653-06, 38653-07 |
| 6  | Combined aortic, mitral and tricuspid valves only surgery<br>(All three valves surgery in single admission)<br>(exclude percutaneous approach)      | 38456-10, 38456-11, 38456-15, 38456-16, 38456-17, 38475-00, 38475-01, 38475-02, 38477-00, 38477-01, 38477-02, 38480-00, 38480-01, 38480-02, 38481-00, 38481-01, 38481-02, 38483-00, 38485-00, 38485-01, 38487-00, 38488-00, 38488-01, 38488-02, 38488-03, 38488-04, 38488-05, 38489-00, 38489-01, 38489-02, 38489-03, 38653-04, 38653-05, 38653-06                                                                       |
| 7  | Combined aortic, tricuspid and pulmonary valves only surgery<br>(All three valves surgery in single admission)<br>(exclude percutaneous approach)   | 38456-01, 38456-10, 38456-11, 38456-15, 38456-17, 38456-18, 38475-01, 38475-02, 38477-01, 38477-02, 38480-00, 38480-02, 38481-00, 38481-02, 38483-00, 38488-00, 38488-01, 38488-04, 38488-05, 38488-06, 38488-07, 38489-00, 38489-01, 38489-03, 38489-04, 38489-05, 38653-04, 38653-06, 38653-07                                                                                                                         |
| 8  | Combined mitral, tricuspid and pulmonary valves only surgery<br>(All three valves surgery in single admission)<br>(exclude percutaneous approach)   | 38456-01, 38456-11, 38456-16, 38456-17, 38456-18, 38475-00, 38475-01, 38477-00, 38477-01, 38480-01, 38480-02, 38481-01, 38481-02, 38485-00, 38485-01, 38487-00, 38488-02, 38488-03, 38488-04, 38488-05, 38488-06, 38488-07, 38489-02, 38489-03, 38489-04, 38489-05, 38653-05, 38653-06, 38653-07                                                                                                                         |
| 9  | Combined aortic and tricuspid valves only surgery<br>(All two valves surgery in single admission)<br>(exclude percutaneous approach)                | 38456-10, 38456-11, 38456-15, 38456-17, 38475-01, 38475-02, 38477-01, 38477-02, 38480-00, 38480-02, 38481-00, 38481-02, 38483-00, 38488-00, 38488-01, 38488-04, 38488-05, 38489-00, 38489-01, 38489-03, 38653-04, 38653-06                                                                                                                                                                                               |
| 10 | Combined mitral and tricuspid valves only surgery<br>(All two valves surgery in single admission)<br>(exclude percutaneous approach)                | 38456-11, 38456-16, 38456-17, 38475-00, 38475-01, 38477-00, 38477-01, 38480-01, 38480-02, 38481-01, 38481-02, 38485-00, 38485-01, 38487-00, 38488-02, 38488-03, 38488-04, 38488-05, 38489-02, 38489-03, 38653-05, 38653-06                                                                                                                                                                                               |

|    |                                                                                                                                         |                                                                                                                                                                          |
|----|-----------------------------------------------------------------------------------------------------------------------------------------|--------------------------------------------------------------------------------------------------------------------------------------------------------------------------|
| 11 | Combined tricuspid and pulmonary valves only surgery<br>(All two valves surgery in single admission)<br>(exclude percutaneous approach) | 38456-01, 38456-11, 38456-17, 38456-18, 38475-01, 38477-01, 38480-02, 38481-02, 38488-04, 38488-05, 38488-06, 38488-07, 38489-03, 38489-04, 38489-05, 38653-06, 38653-07 |
| 12 | Tricuspid valve surgery sub-category:<br>• Tricuspid valve open valvotomy                                                               | 38456-11                                                                                                                                                                 |
| 13 | Tricuspid valve surgery sub-category:<br>• Tricuspid valve repair                                                                       | 38480-02, 38481-02                                                                                                                                                       |
| 14 | Tricuspid valve surgery sub-category:<br>• Tricuspid valve annuloplasty                                                                 | 38475-01, 38477-01                                                                                                                                                       |
| 15 | Tricuspid valve surgery sub-category:<br>• Tricuspid valve replacement<br>(exclude percutaneous approach)                               | 38488-04, 38488-05, 38489-03                                                                                                                                             |
| 16 | Tricuspid valve surgery sub-category:<br>• Other intrathoracic procedures on tricuspid valve                                            | 38456-17, 38653-06                                                                                                                                                       |

**Supplementary Table 2. Univariable associations with all-cause mortality during study period**

| Univariable analysis                                              | Parameters                     | HR (95% CI)      | P value |
|-------------------------------------------------------------------|--------------------------------|------------------|---------|
| <b>All-cause death during study follow-up (4.82 ± 3.94 years)</b> | Age ≥59 years *                | 2.16 (1.60-2.89) | <0.001  |
|                                                                   | Male                           | 1.02 (0.78-1.34) | 0.87    |
|                                                                   | Referral source                | -                | 0.27    |
|                                                                   | Emergency Department           | 1.00 (reference) | -       |
|                                                                   | Physician-referred             | 0.70 (0.48-1.02) | 0.06    |
|                                                                   | External hospital-referred     | 0.84 (0.54-1.32) | 0.45    |
|                                                                   | Others                         | 1.33 (0.41-4.34) | 0.63    |
|                                                                   | Unknown                        | 0.52 (0.12-2.16) | 0.37    |
|                                                                   | Indication for valve surgery † | -                | -       |
|                                                                   | Endocarditis                   | 0.57 (0.33-0.96) | 0.03    |
|                                                                   | Rheumatic tricuspid valve      | 1.32 (0.98-1.77) | 0.07    |
|                                                                   | Types of TV surgery ‡          |                  |         |
|                                                                   | Annuloplasty                   | 0.92 (0.70-1.21) | 0.56    |
|                                                                   | Replacement                    | 1.35 (1.03-1.77) | 0.03    |
|                                                                   | Repair                         | 0.50 (0.32-0.79) | 0.003   |
|                                                                   | Open valvotomy                 | 0.39 (0.06-2.80) | 0.35    |
|                                                                   | Others                         | 0.57 (0.24-1.39) | 0.22    |
|                                                                   | Concomitant CABG §             | 1.63 (1.16-2.29) | 0.005   |
|                                                                   | Ischemic heart disease         | 1.55 (1.14-2.12) | 0.006   |
|                                                                   | Prior PCI / CABG               | 1.30 (0.77-2.20) | 0.33    |
|                                                                   | Congestive cardiac failure     | 1.94 (1.48-2.54) | <0.001  |
|                                                                   | Stroke                         | 2.79 (1.23-6.31) | 0.01    |
|                                                                   | Peripheral vascular disease    | 1.67 (0.95-2.93) | 0.07    |
|                                                                   | Prosthetic heart valve         | 1.11 (0.74-1.65) | 0.61    |
|                                                                   | Atrial fibrillation/flutter    | 1.28 (0.98-1.69) | 0.07    |
|                                                                   | Hypertension                   | 1.15 (0.86-1.55) | 0.35    |
|                                                                   | Hyperlipidaemia                | 1.29 (0.68-2.44) | 0.43    |
|                                                                   | Diabetes                       | 1.54 (1.08-2.19) | 0.02    |
|                                                                   | Current/ex-smoker              | 0.96 (0.73-1.28) | 0.80    |
|                                                                   | Primary PHT                    | 1.03 (0.43-2.51) | 0.94    |
|                                                                   | Secondary PHT                  | 2.05 (1.45-2.88) | <0.001  |
|                                                                   | Malignancy                     | 3.54 (1.81-6.91) | <0.001  |
|                                                                   | Chronic pulmonary disease      | 2.62 (1.64-4.18) | <0.001  |
|                                                                   | Neurodegenerative disease ¶    | 1.73 (0.43-6.97) | 0.44    |
|                                                                   | Chronic kidney disease         | 1.78 (1.24-2.57) | 0.002   |
|                                                                   | IVDU history                   | 0.64 (0.39-1.07) | 0.09    |
|                                                                   | CCI score – per 1-score #      | 1.25 (1.18-1.33) | <0.001  |
|                                                                   | CCI score ≥1                   | 2.39 (1.79-3.20) | <0.001  |
|                                                                   | Year of surgery                | -                | 0.87    |
|                                                                   | 2002-2005                      | 1.00 (reference) | -       |
|                                                                   | 2006-2009                      | 0.86 (0.56-1.31) | 0.48    |
| 2010-2013                                                         | 0.90 (0.59-1.38)               | 0.63             |         |
| 2014-2018                                                         | 0.82 (0.51-1.35)               | 0.44             |         |

---

Plus-minus value represents mean  $\pm$  standard deviation (SD).

**CABG, coronary artery bypass graft; CCI, Charlson comorbidity index; CI, confidence interval; HR, hazards ratio; IVDU, intravenous drug use; NA, not applicable due to small sample size; PCI, percutaneous coronary interventions; PHT, pulmonary hypertension; TV, tricuspid valve.**

\* Age was dichotomized based on mean age of study cohort.

† Indication for cardiac valve surgery was either for endocarditis or for non-endocarditis cardiac valvular pathology.

‡ More than one type of TV surgery might be performed on a patient during the same admission.

§ Concomitant CABG performed during same admission for cardiac valve surgery.

|| Neurodegenerative disease includes dementia, central nervous systemic atrophies, Parkinson's disease, basal ganglia degeneration, and/or nervous systemic degenerative diseases.

# Conditions included in the Charlson Comorbidity Index include myocardial infarction, congestive cardiac failure, peripheral vascular disease, stroke, dementia, chronic pulmonary disease, connective tissue disease, peptic ulcer disease, liver disease (mild vs. moderate to severe), diabetes (with or without organ damage), hemiplegia, moderate to severe renal disease, any tumour (within last 5 years), lymphoma, leukemia, metastatic solid tumour and acquired immunodeficiency syndrome.

---



**Supplementary Table 3. Independent predictors for all-cause mortality during study period**

| Multivariable analysis *                                          | Parameters                     | aHR (95% CI)      | P value |
|-------------------------------------------------------------------|--------------------------------|-------------------|---------|
| <b>All-cause death during study follow-up (4.82 ± 3.94 years)</b> | Age ≥59 years (mean age)       | 1.76 (1.26-2.47)  | 0.001   |
|                                                                   | Male                           | 1.01 (0.76-1.34)  | 0.96    |
|                                                                   | Indication for valve surgery † |                   |         |
|                                                                   | Endocarditis                   | 1.00 (0.56-1.77)  | 0.99    |
|                                                                   | Types of TV surgery ‡          |                   |         |
|                                                                   | Replacement                    | 1.32 (0.98-1.79)  | 0.07    |
|                                                                   | Repair                         | 0.78 (0.047-1.28) | 0.33    |
|                                                                   | Concomitant CABG §             | 1.34 (0.86-2.08)  | 0.20    |
|                                                                   | Ischemic heart disease         | 1.14 (0.77-1.70)  | 0.51    |
|                                                                   | Congestive cardiac failure     | 1.78 (1.33-2.38)  | <0.001  |
|                                                                   | Stroke                         | 2.25 (0.96-5.26)  | 0.06    |
|                                                                   | Diabetes                       | 1.12 (0.77-1.65)  | 0.55    |
|                                                                   | Secondary PHT                  | 1.36 (0.95-1.95)  | 0.10    |
|                                                                   | Malignancy                     | 3.49 (1.73-7.07)  | <0.001  |
|                                                                   | Chronic pulmonary disease      | 2.21 (1.36-3.59)  | <0.001  |
| Chronic kidney disease                                            | 1.26 (0.85-1.87)               | 0.25              |         |

Plus-minus value represents mean ± standard deviation (SD).

CABG, coronary artery bypass graft; CI, confidence interval; aHR, adjusted hazards ratio; PCI, percutaneous coronary interventions; PHT, pulmonary hypertension; TV, tricuspid valve.

\* Multivariable Cox regression method was used to identify independent predictors of all-cause mortality. Only univariables with P<0.05 were included in the multivariable analysis (see Supplementary Table 2 for univariable analysis results).

† Indication for cardiac valve surgery was either for endocarditis or non-endocarditis cardiac valvular pathology

‡ More than one type of TV surgery might be performed on a patient during the same admission.

§ Concomitant CABG performed during same admission for cardiac valve surgery.

**Supplementary Figure 1. Study flow chart.**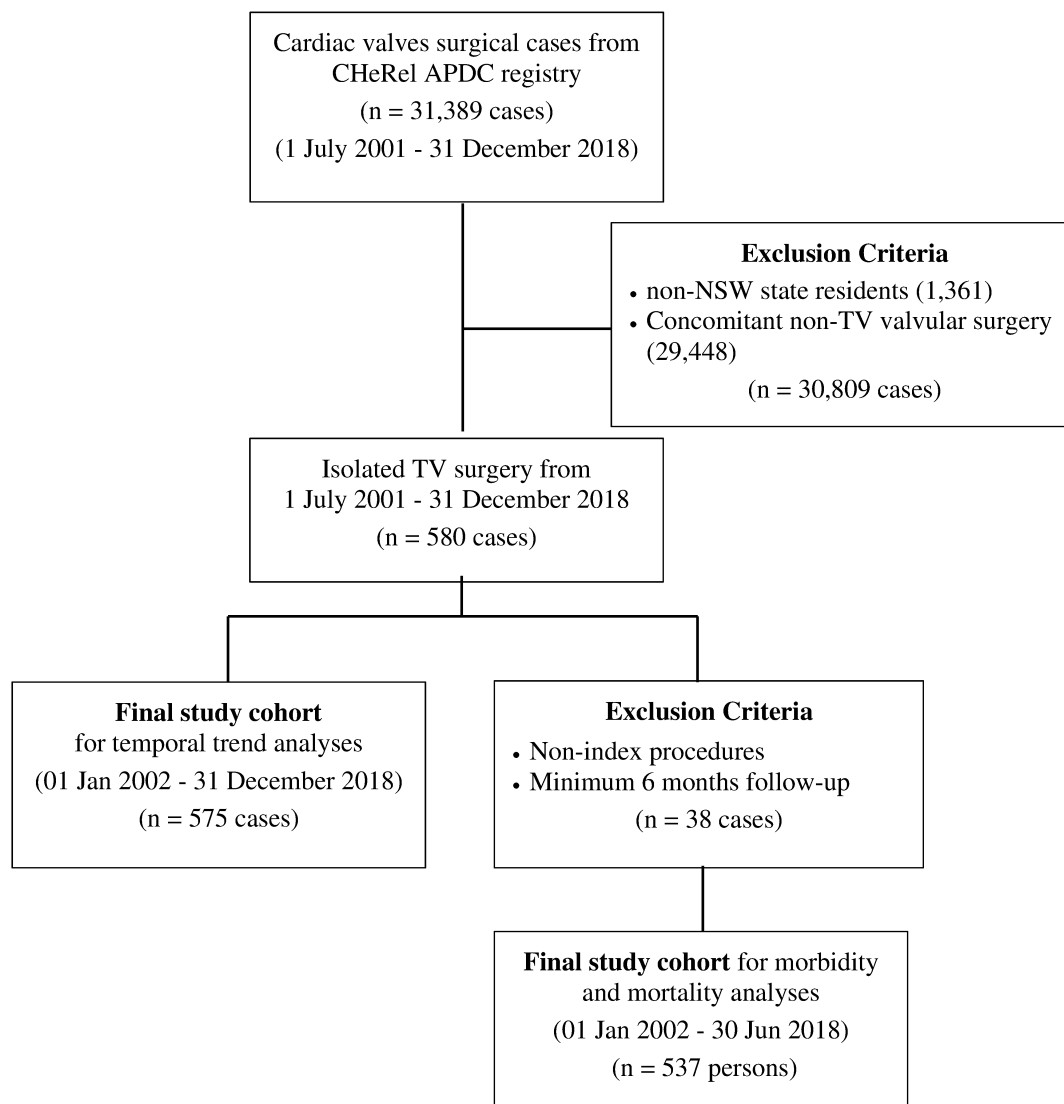**Legend**

Flow chart shows the derivation of the study cohort.

APDC, Admitted Patient Data Collection; CHeRel, Centre for Health Record Linkage; NSW, New South Wales.

\* Dataset containing all statewide admitted patients who underwent a broad range of cardiac procedures including coronary angiography, percutaneous coronary intervention, electrophysiology procedures and transesophageal echocardiography.

**Supplementary Figure 2. Temporal trend of tricuspid valve annuloplasty during study period.**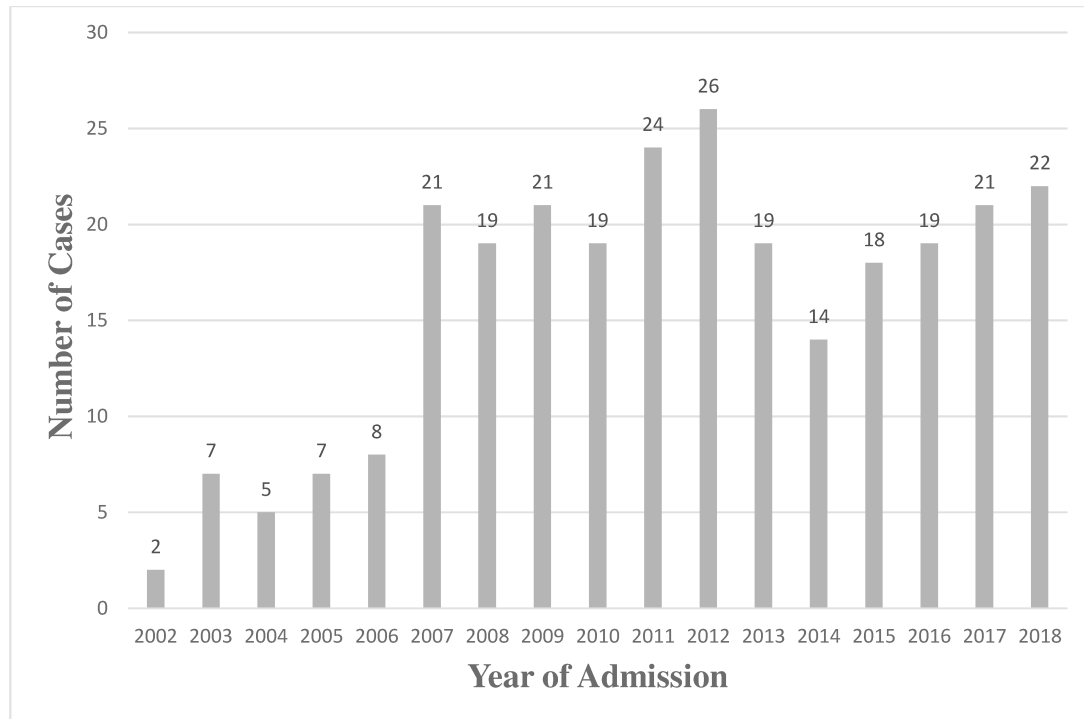**Legend**

Figure shows temporal trend of tricuspid valve annuloplasty during study period (n=272), with a mean ( $\pm$ SD) of  $16.0 \pm 7.3$  cases per annum. Tricuspid valve annuloplasty caseload increased significantly over the course of the study period by an average of 0.46 cases per year (95% CI 0.21-0.72,  $p=0.002$ ).

**Supplementary Figure 3. Temporal trend of tricuspid valve replacement during study period.**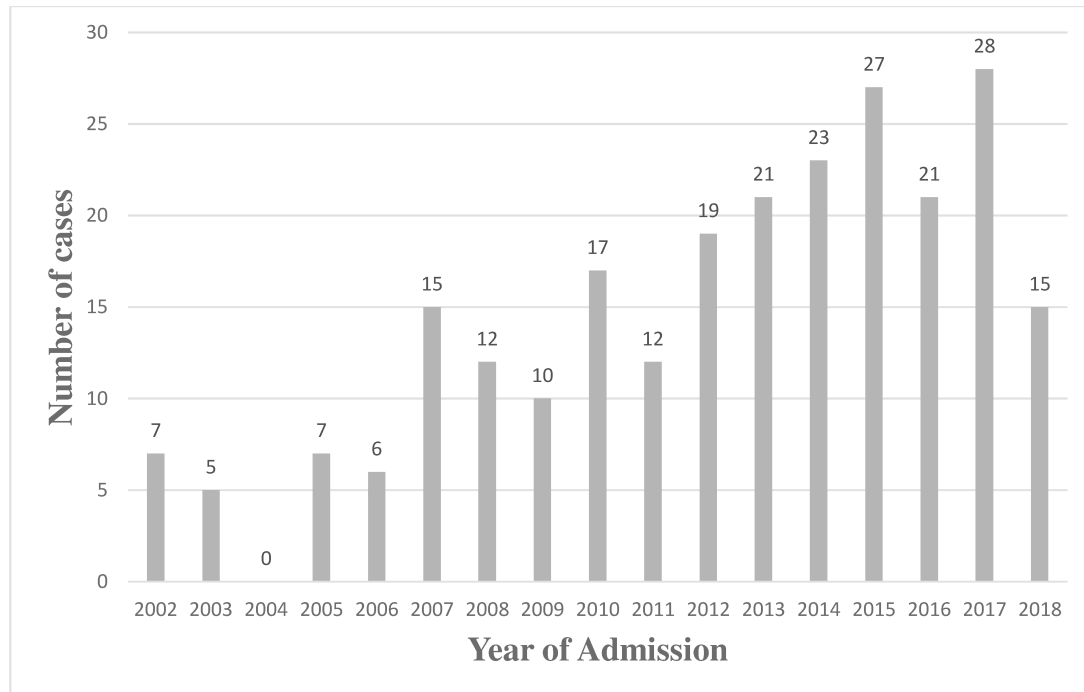**Legend**

Figure shows temporal trend of tricuspid valve replacement during study period (n=245), with a mean ( $\pm$ SD) of  $14.4 \pm 8.1$  cases per annum. Tricuspid valve replacement caseload increased significantly over the study period by an average of 0.53 cases per year (95% CI 0.40-0.65,  $p < 0.001$ ).

**Supplementary Figure 4. Temporal trend of open tricuspid valvotomy during study period.**

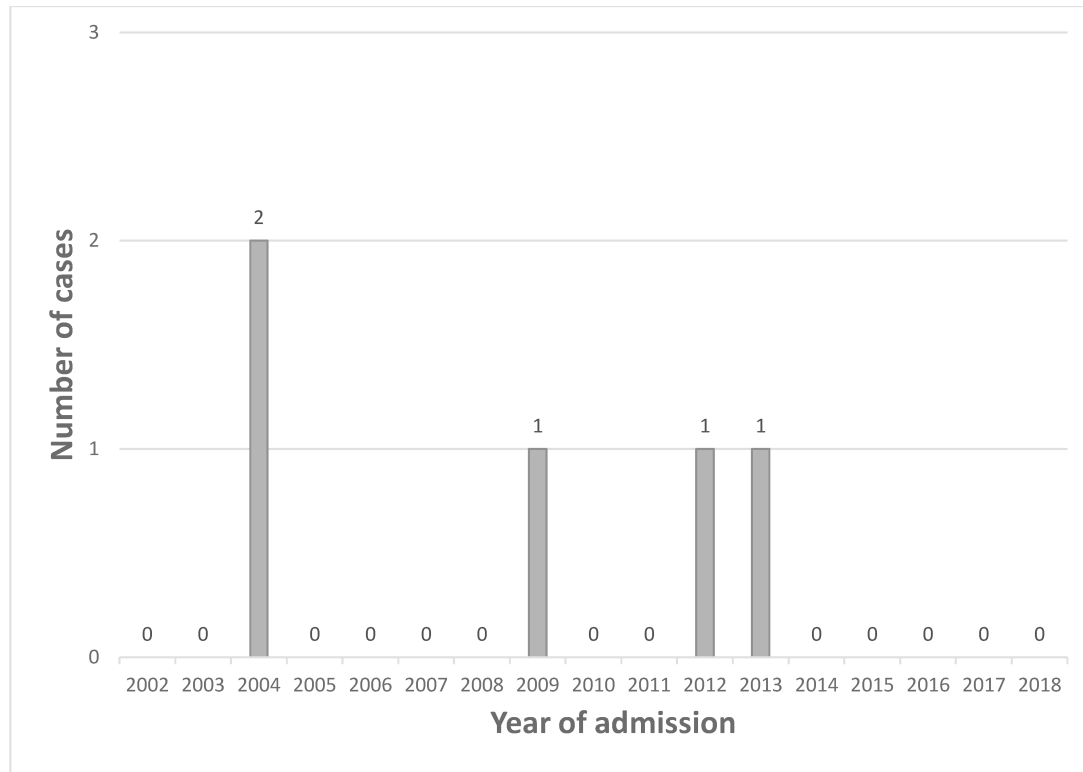

**Legend**

Figure shows temporal trend of open tricuspid valvotomy during study period (n=5), with a mean ( $\pm$ SD) of  $0.3 \pm 0.6$  cases per annum. There was no significant change in annual caseload valvotomies over the course of the study period ( $p=0.64$ ).

**Supplementary Figure 5. Temporal trend of tricuspid valve repair during study period.**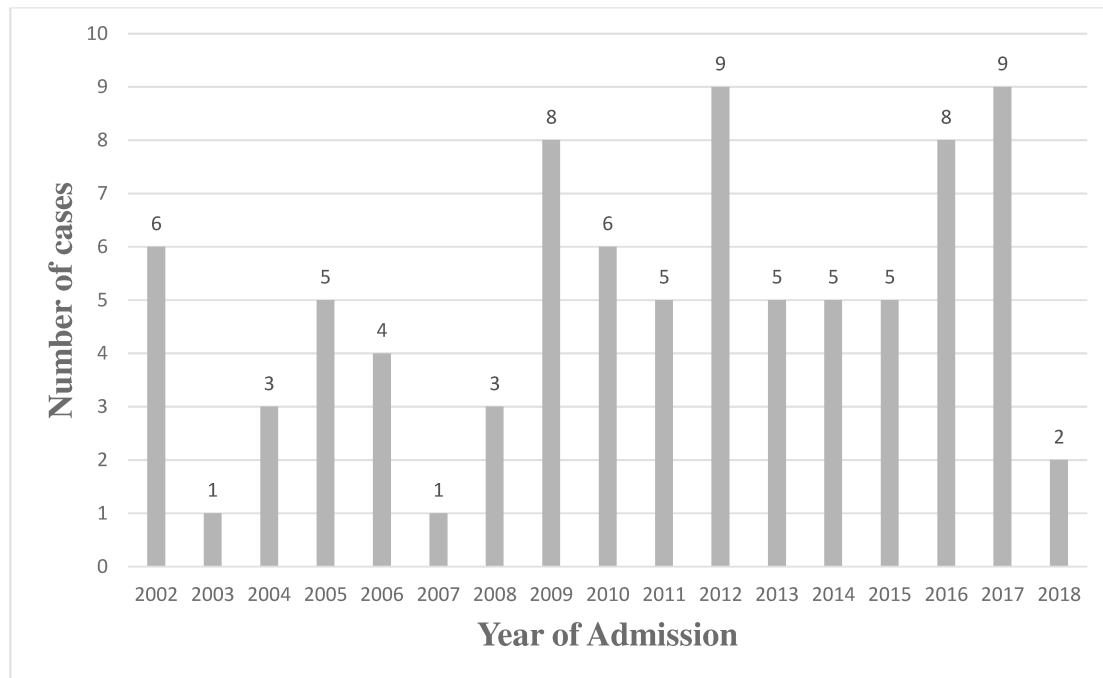**Legend**

Figure shows temporal trend of tricuspid valve repair during study period (n=85), with a mean ( $\pm$ SD) of  $5.0 \pm 2.5$  cases per annum. Tricuspid valve repairs increased significantly over the study period by an average of 1.13 cases per year (95% CI 0.24-2.02,  $p=0.02$ ).
